# Supplementary material
Source: ML conference proceedings conference paper supplement (https://openreview.net/forum?id=TNxKD3z_tPZ)
Supplement: supplementary_material [file attachment]

# PERSISTENT HOMOLOGY CAPTURES THE GENERALIZATION OF NEURAL NETWORKS WITHOUT A VALIDATION SET

## *Supplementary Material*

**Anonymous authors**

Paper under double-blind review

### APPENDIX I

Mathematical definitions are contained in this Appendix.

**Definition 1 (simplex)** A  $k$ -simplex is a  $k$ -dimensional polytope which is the convex hull of its  $k + 1$  vertices. i.e. the set of all convex combinations  $\lambda_0 v_0 + \lambda_1 v_1 + \dots + \lambda_k v_k$  where  $\lambda_0 + \lambda_1 + \dots + \lambda_k = 1$  and  $0 \leq \lambda_j \leq 1 \ \forall j \in \{0, 1, \dots, k\}$ .

Some examples of simplices are points (0-simplex), line segments (1-simplex), triangles (2-simplex) or tetrahedrons (3-simplex).

**Definition 2 (simplicial complex)** We define a simplicial complex  $\mathcal{K}$  is a set of simplices that satisfies the following conditions:

1. Every subset (or face) of a simplex in  $\mathcal{K}$  also belongs to  $\mathcal{K}$ .
2. For any two simplices  $\sigma_1$  and  $\sigma_2$  in  $\mathcal{K}$ , if  $\sigma_1 \cap \sigma_2 \neq \emptyset$ , then  $\sigma_1 \cap \sigma_2$  is a common subset, or face, of both  $\sigma_1$  and  $\sigma_2$ .

**Definition 3 (directed flag complex)** The directed flag complex (for example, on a directed graph  $G = (V, E)$ ),  $FC(G)$ , is defined to be the ordered simplicial complex whose  $k$ -simplices are all ordered  $(k + 1)$ -cliques, i.e.,  $(k + 1)$ -tuples  $\sigma = (v_0, v_1, \dots, v_k)$ , such that  $v_i \in V \ \forall i$ , and  $(v_i, v_j) \in E$  for  $i < j$ .

Boundary function, denoted by  $\partial$  symbol, is a function that maps  $i$ -simplex to the sum of its  $(i-1)$ -dimensional faces. Formally speaking, for an  $i$ -simplex  $\sigma = [v_0, \dots, v_i]$ , its *boundary* ( $\partial$ ) is:

$$\partial_i \sigma = \sum_{j=0}^i [v_0, \dots, \hat{v}_j, \dots, v_i] \quad (1)$$

where the hat indicates the  $v_j$  is omitted.

This definition can be expanded to  $i$ -chains. For an  $i$ -chain  $c = \sum_i c_i \sigma_i$ ,  $\partial_i(c) = \sum_i c_i \partial_i \sigma_i$ .

We can now distinguish two special types of chains using the boundary map that will be useful to define homology:

- The first one is an  $i$ -cycle, which is defined as an  $i$ -chain with empty boundary. In other words, an  $i$ -chain  $c$  is an  $i$ -cycle if and only if  $\partial_i(c) = 0$ , i.e.  $c \in \text{Ker}(\partial_i)$ .
- An  $i$ -chain  $c$  is  $i$ -boundary if there exists an  $(i + 1)$ -chain  $d$  such that  $c = \partial_{i+1}(d)$ , i.e.  $c \in \text{Im}(\partial_{i+1})$ .

**Definition 4 (graph)** A graph  $G$  is a pair  $(V, E)$ , where  $V$  is a finite set referred to as the vertices or nodes of  $G$ , and  $E$  is a subset of the set of unordered pairs  $e = \{u, v\}$  of distinct points in  $V$ , which we call the edges of  $G$ . Geometrically the pair  $\{u, v\}$  indicates that the vertices  $u$  and  $v$  are adjacent in  $G$ . A directed graph, or a digraph, is similarly a pair  $(V, E)$  of vertices  $V$  and edges  $E$ ,

except the edges are ordered pairs of distinct vertices, i.e., the pair  $(u, v)$  indicates that there is an edge from  $u$  to  $v$  in  $G$ . In a digraph, we allow reciprocal edges, i.e., both  $(u, v)$  and  $(v, u)$  may be edges in  $G$ , but we exclude loops, i.e., edges of the form  $(v, v)$ .

**Definition 5 (homology group)** Given these two special subspaces,  $i$ -cycles  $Z_i(K)$  and  $i$ -boundaries  $B_i(K)$  of  $C_i(K)$ , we now take the quotient space of  $B_i(K)$  as a subset of  $Z_i(K)$ . In this quotient space, there are only the  $i$ -cycles that do not bound an  $(i + 1)$ -complex, or  $i$ -voids of  $K$ . This quotient space is called  $i$ -th homology group of the simplicial complex  $K$ :

$$H_i(K) = \frac{Z_i(K)}{B_i(K)} = \frac{Ker(\partial_i)}{Im(\partial_{i+1})} \quad (2)$$

where  $Ker$  and  $Im$  are the function kernel and image respectively.

The dimension of  $i$ -th homology is called the  $i$ -th Betti number of  $K$ ,  $\beta_i(K)$ , where:

$$\beta_i(K) = \dim(Ker(\partial_i)) - \dim(Im(\partial_{i+1})) \quad (3)$$

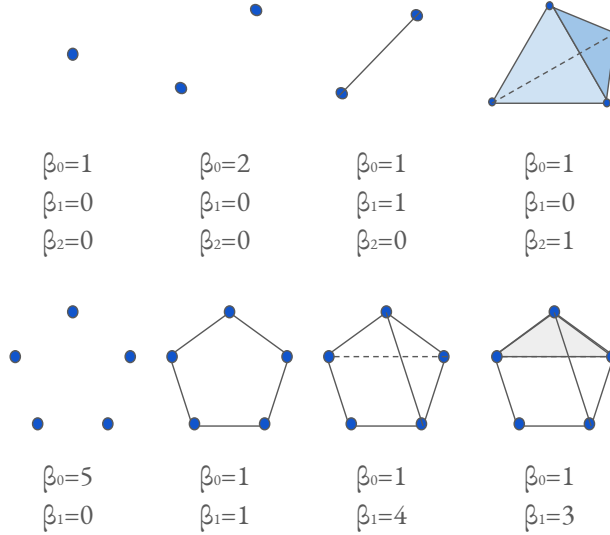

Figure 1: Betti numbers example

**Definition 6 (Wasserstein distance)** The  $p$ -Wasserstein distance between two PDs  $D_1$  and  $D_2$  is the infimum over all bijections:  $\gamma : D_1 \rightarrow D_2$  of:

$$d_W(D_1, D_2) = \left( \sum_{x \in D_1} \|x - \gamma(x)\|_\infty^p \right)^{1/p} \quad (4)$$

where  $\| - \|_\infty$  is defined for  $(x, y) \in \mathbb{R}^2$  by  $\max\{|x|, |y|\}$ . The limit  $p \rightarrow \infty$  defines the Bottleneck distance. More explicitly, it is the infimum over the same set of bijections of the value

$$d_B(D_1, D_2) = \sup_{x \in D_1} \|x - \gamma(x)\|_\infty. \quad (5)$$

**Definition 7 (Persistence landscape)** Given a collection of intervals  $\{(b_i, d_i)\}_{i \in I}$  that compose a PD, its persistence landscape is the set of functions  $\lambda_k : \mathbb{R} \rightarrow \mathbb{R}$  defined by letting  $\lambda_k(t)$  be the  $k$ -th largest value of the set  $\{\Lambda_i(t)\}_{i \in I}$  where:

$$\Lambda_i(t) = [\min\{t - b_i, d_i - t\}]_+ \quad (6)$$

and  $c_+ := \max(c, 0)$ . The function  $\lambda_k$  is referred to as the  $k$ -layer of the persistence landscape.

Now we define a vectorization of the set of real-valued function that compose PDs on  $\mathbb{N} \times \mathbb{R}$ . For any  $p = 1, \dots, \infty$  we can restrict attention to PDs  $D$  whose associated persistence landscape  $\lambda$  is  $p$ -integrable, that is to say,

$$\|\lambda\|_p = \left( \sum_{i \in \mathbb{N}} \|\lambda_i\|_p^p \right)^{1/p} \quad (7)$$

is finite. In this case, we refer to Equation (7) as the  $p$ -landscape norm of  $D$ . For  $p = 2$ , we define the value of the landscape kernel or similarity of two vectorized PDs  $D$  and  $E$  as

$$\langle \lambda, \mu \rangle = \left( \sum_{i \in \mathbb{N}} \int_{\mathbb{R}} |\lambda_i(x) - \mu_i(x)|^2 dx \right)^{1/2} \quad (8)$$

where  $\lambda$  and  $\mu$  are their associated persistence landscapes.

$\lambda_k$  is geometrically described as follows. For each  $i \in I$ , we draw an isosceles triangle with base the interval  $(b_i, d_i)$  on the horizontal  $t$ -axis, and sides with slope 1 and  $-1$ . This subdivides the plane into a number of polygonal regions that we label by the number of triangles contained on it. If  $P_k$  is the union of the polygonal regions with values at least  $k$ , then the graph of  $\lambda_k$  is the upper contour of  $P_k$ , with  $\lambda_k(a) = 0$  if the vertical line  $t = a$  does not intersect  $P_k$ .

**Definition 8 (Weighted Silhouette)** Let  $D = \{(b_i, d_i)\}_{i \in I}$  be a PD and  $w = \{w_i\}_{i \in I}$  a set of positive real numbers. The Silhouette of  $D$  weighted by  $w$  is the function  $\phi : \mathbb{R} \rightarrow \mathbb{R}$  defined by:

$$\phi(t) = \frac{\sum_{i \in I} w_i \Lambda_i(t)}{\sum_{i \in I} w_i}, \quad (9)$$

where

$$\Lambda_i(t) = [\min\{t - b_i, d_i - t\}]_+ \quad (10)$$

and  $c_+ := \max(c, 0)$ . When  $w_i = |d_i - b_i|^p$  for  $0 < p \leq \infty$  we refer to  $\phi$  as the  $p$ -power-weighted Silhouette of  $D$ . It defines a vectorization of the set of PDs on the vector space of continuous real-valued functions on  $\mathbb{R}$ .

**Definition 9 (Heat vectorizations)** Considering PD as the support of Dirac deltas, one can construct, for any  $t > 0$ , two vectorizations of the set of PDs to the set of continuous real-valued function on the first quadrant  $\mathbb{R}_{>0}^2$ . The Heat vectorization is constructed for every PD  $D$  by solving the heat equation:

$$\begin{aligned} \Delta_x(u) &= \partial_t u && \text{on } \Omega \times \mathbb{R}_{>0} \\ u &= 0 && \text{on } \{x_1 = x_2\} \times \mathbb{R}_{\geq 0} \\ u &= \sum_{p \in D} \delta_p && \text{on } \Omega \times 0 \end{aligned} \quad (11)$$

where  $\Omega = \{(x_1, x_2) \in \mathbb{R}^2 \mid x_1 \leq x_2\}$ , then solving the same equation after precomposing the data of Equation (11) with the change of coordinates  $(x_1, x_2) \mapsto (x_2, x_1)$ , and defining the image of  $D$  to be the difference between these two solutions at the chosen time  $t$ .

We recall that the solution to the Heat equation with initial condition given by a Dirac delta supported at  $p \in \mathbb{R}^2$  is:

$$\frac{1}{4\pi t} \exp\left(-\frac{\|p - x\|^2}{4t}\right) \quad (12)$$

To highlight the connection with normally distributed random variables, it is customary to use the change of variable  $\sigma = \sqrt{2t}$ .

For a complete reference on vectorized persistence summaries and PH approximated metrics, see Tauzin et al. (2020); Berry et al. (2020) and Giotto-TDA package documentation appendix<sup>1</sup>.

<sup>1</sup><https://giotto-ai.github.io/gtda-docs/0.3.1/theory/glossary.html#persistence-landscape>

## APPENDIX II

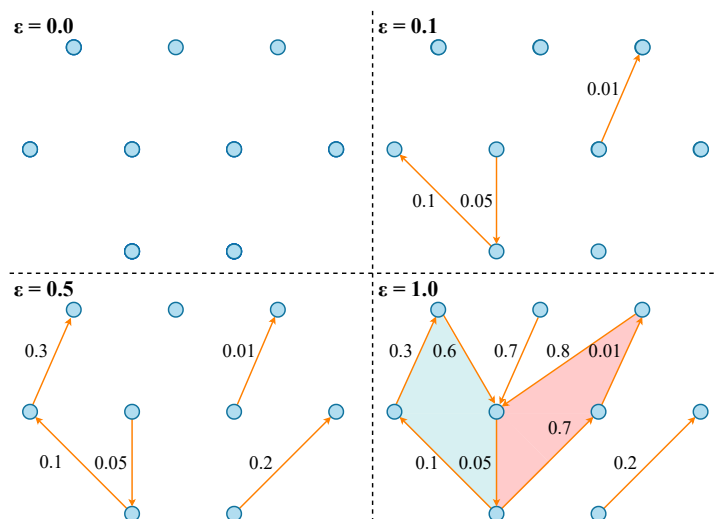

Figure 2: MLP Simplicial complex filtration example.

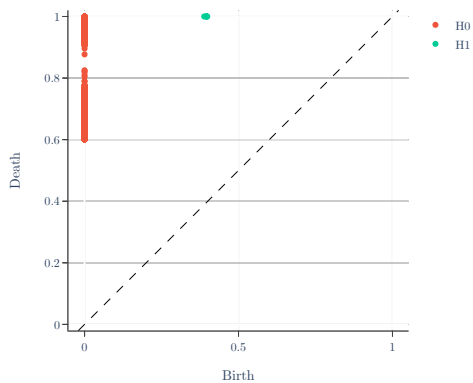

Figure 3: An example of Persistence Homology diagram

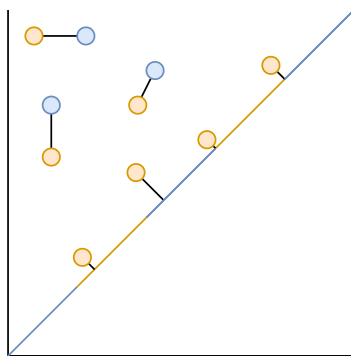

Figure 4: Persistence Homology diagram distance example.



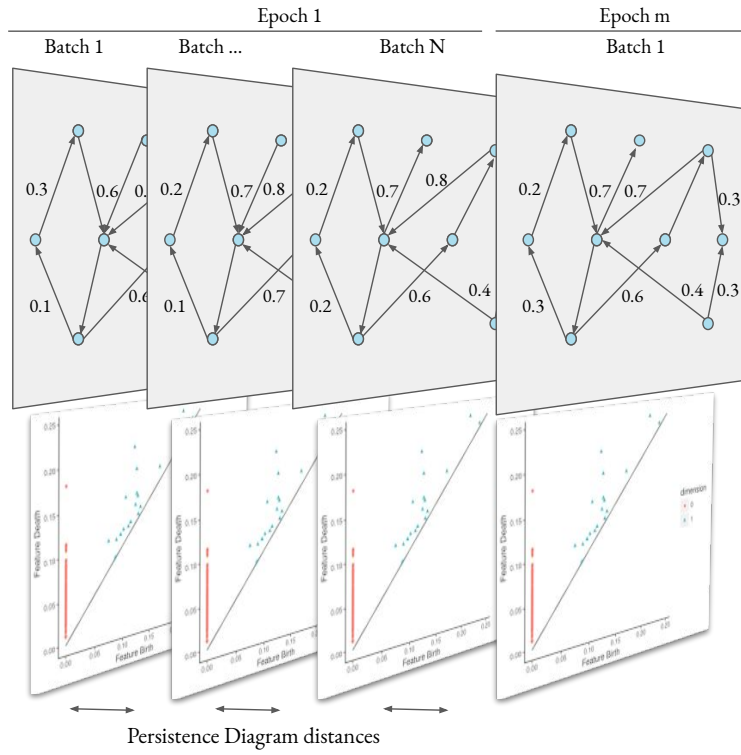

Figure 5: MLP learning evolution PD similarity process.

## APPENDIX III

## CUMULATIVE PLOTS

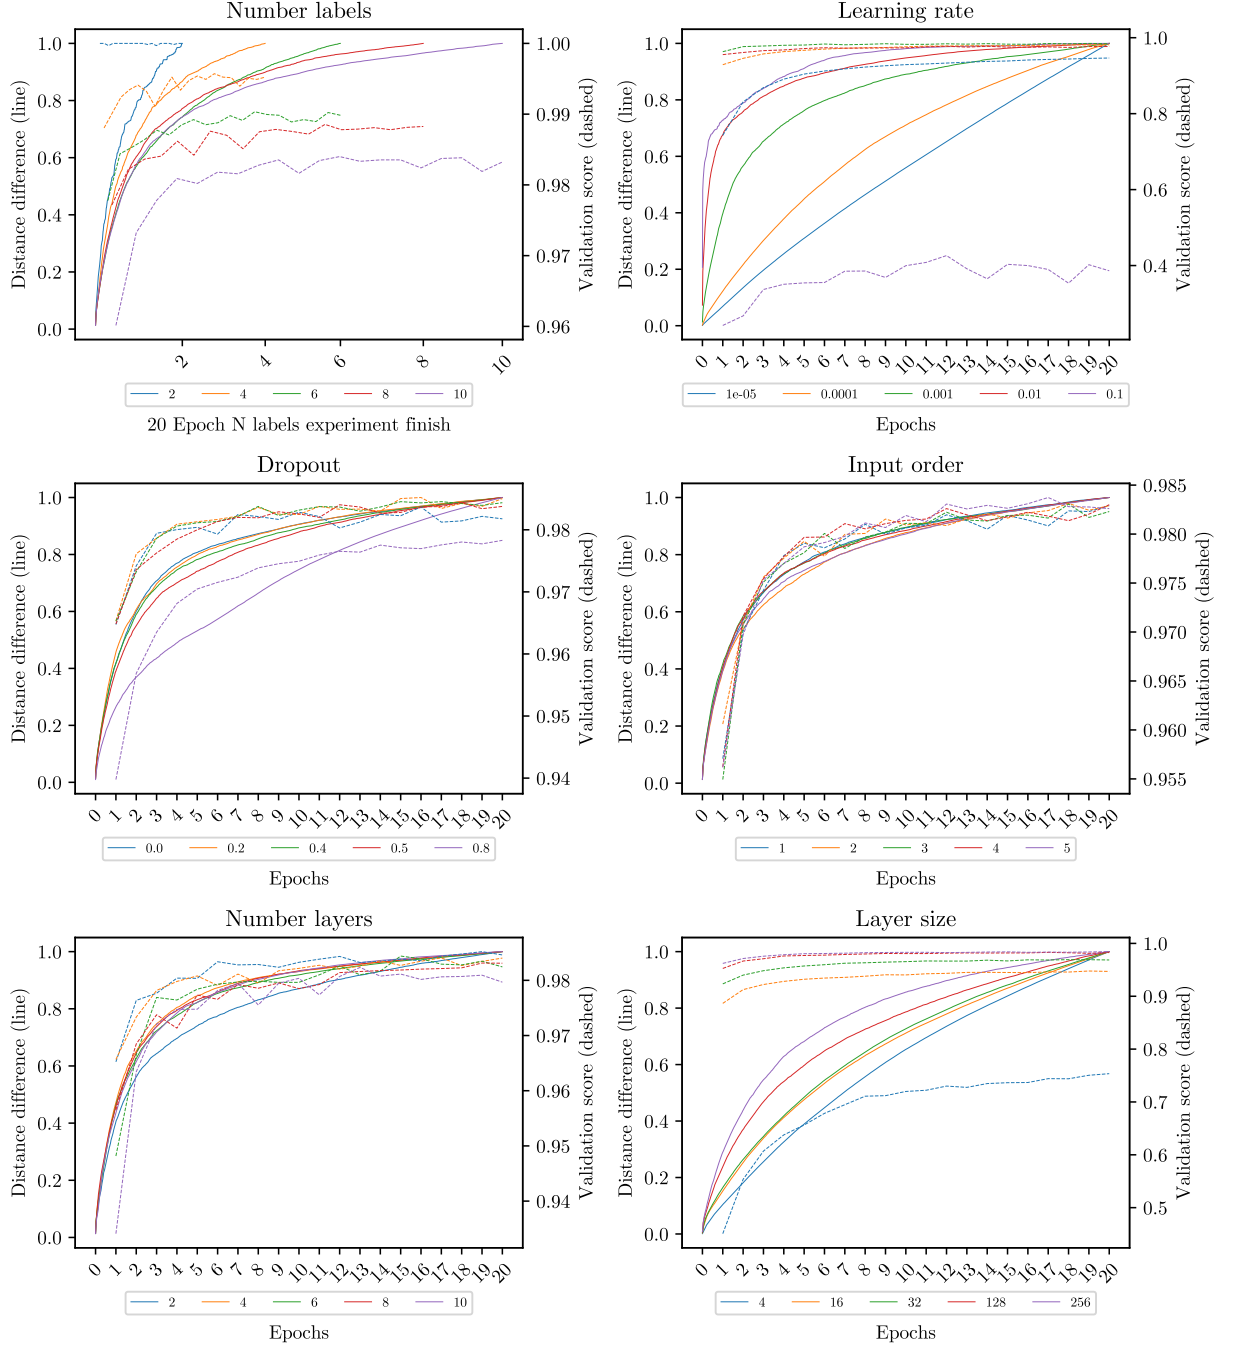

Figure 6: MNIST cumulative using Heat discretization.

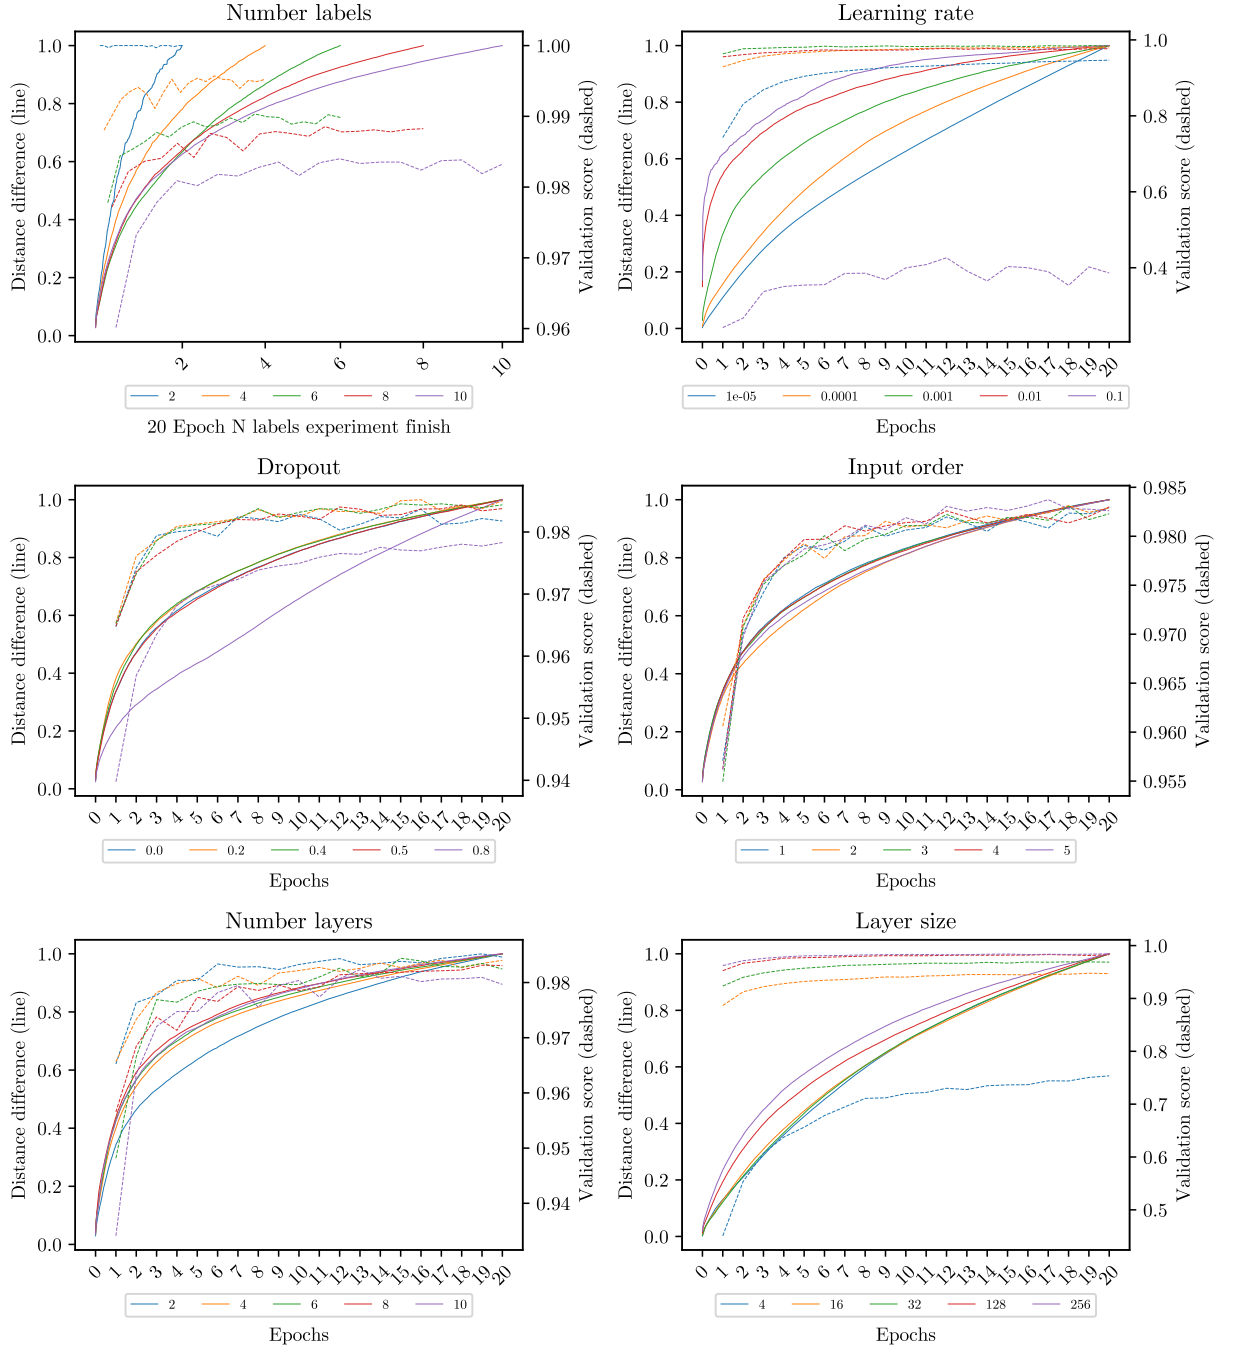

Figure 7: MNIST cumulative using Silhouette discretization.

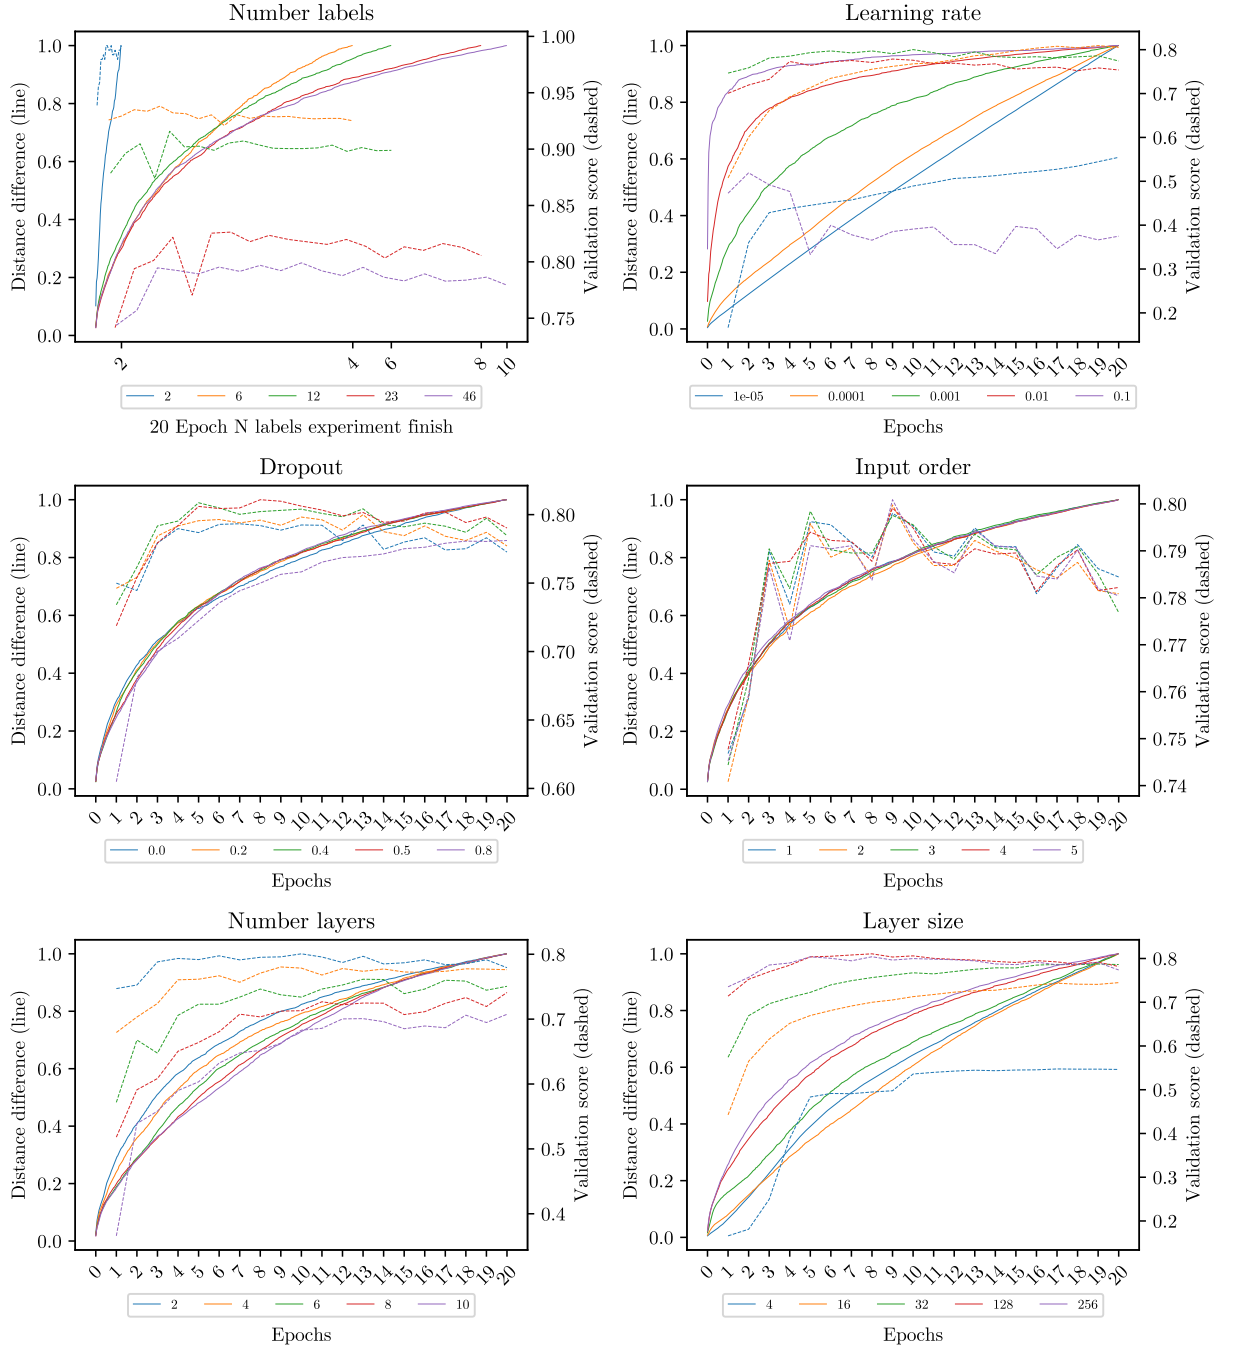

Figure 8: Reuters cumulative using Heat discretization.

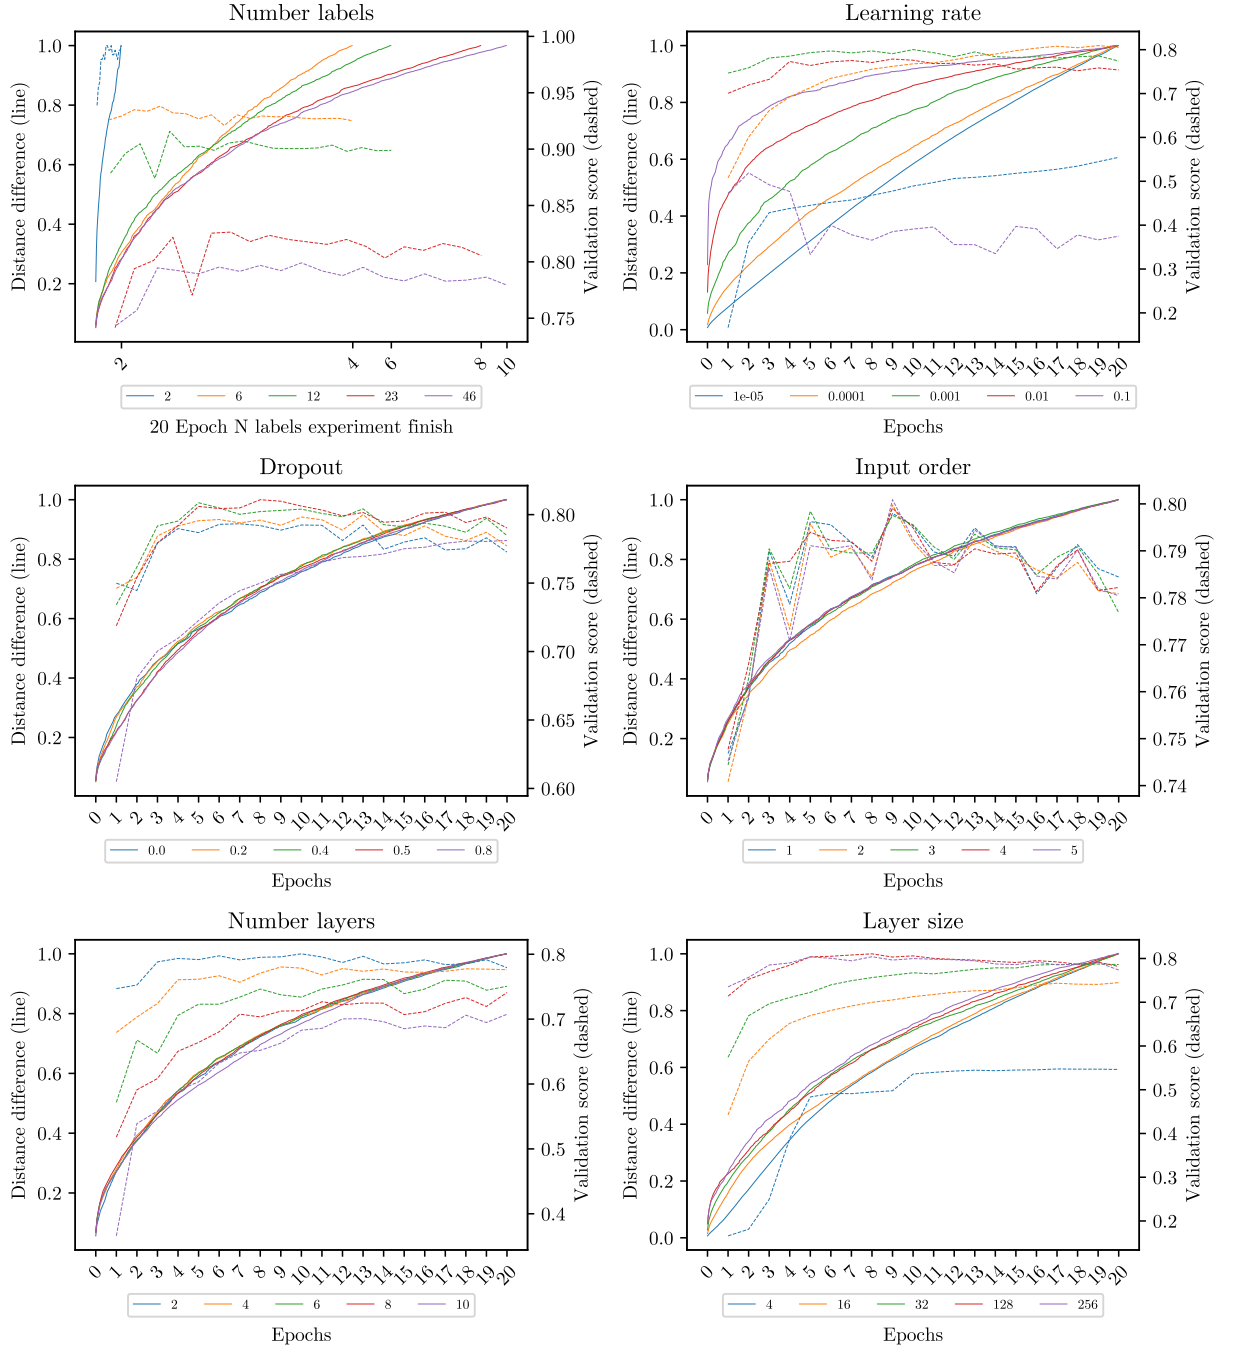

Figure 9: Reuters cumulative using Silhouette discretization.

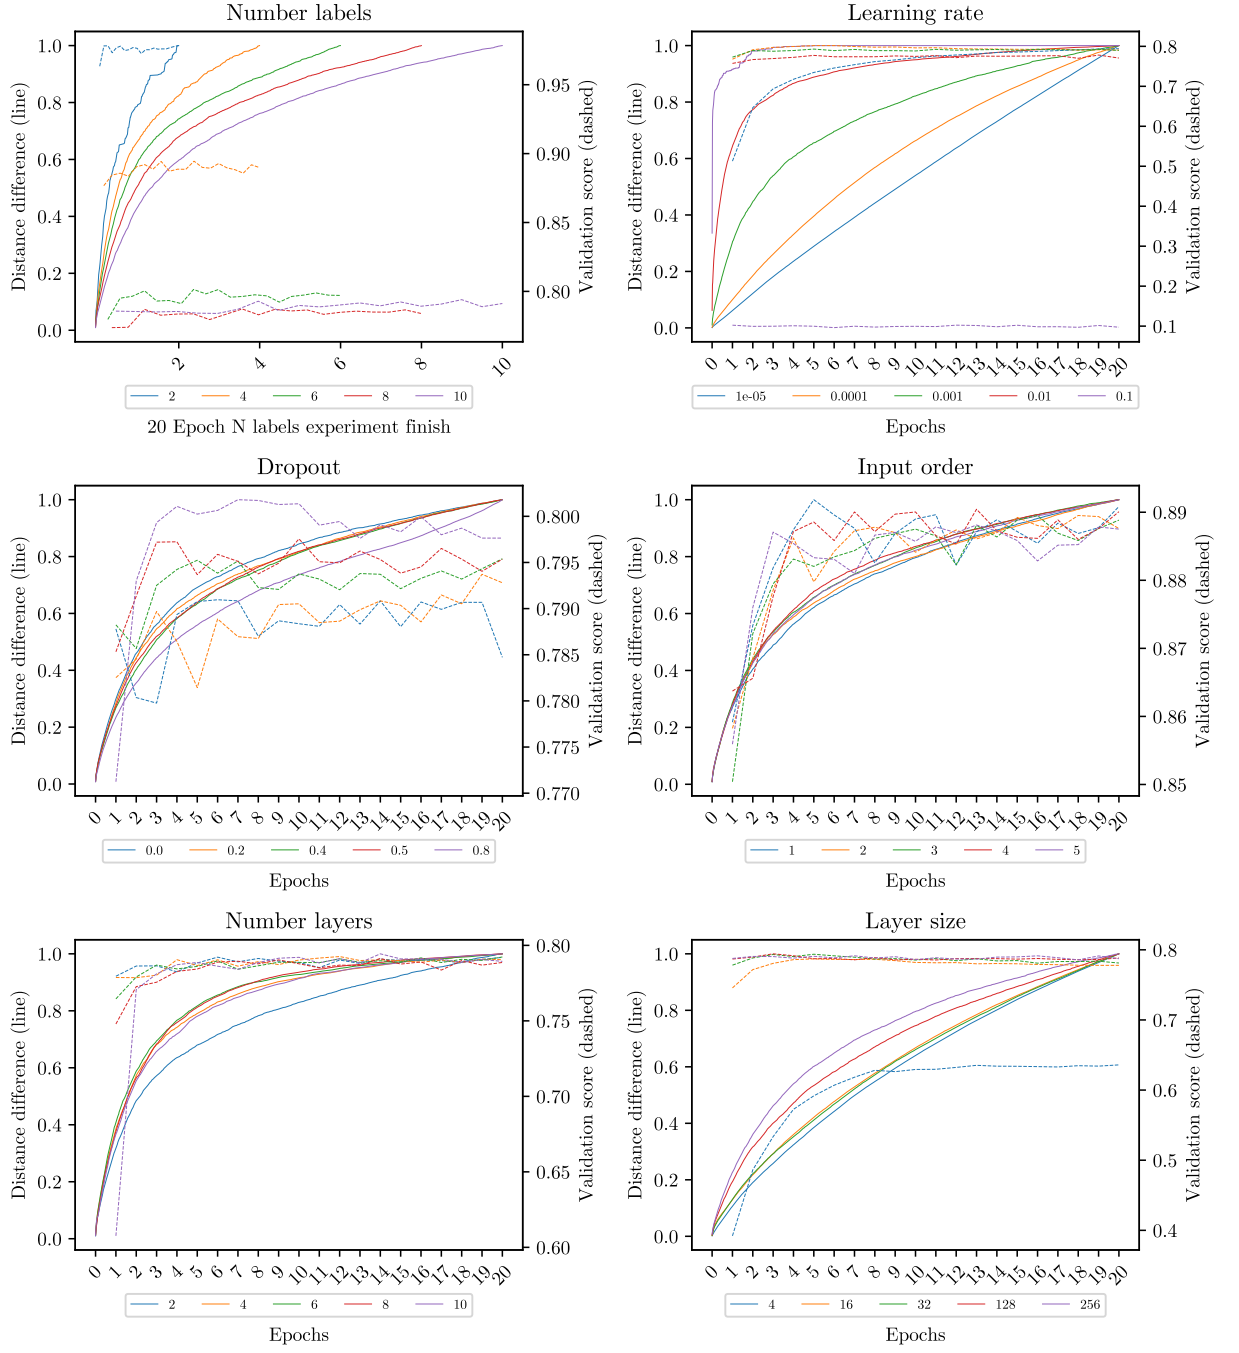

Figure 10: CIFAR-10 CNN cumulative using Heat discretization.

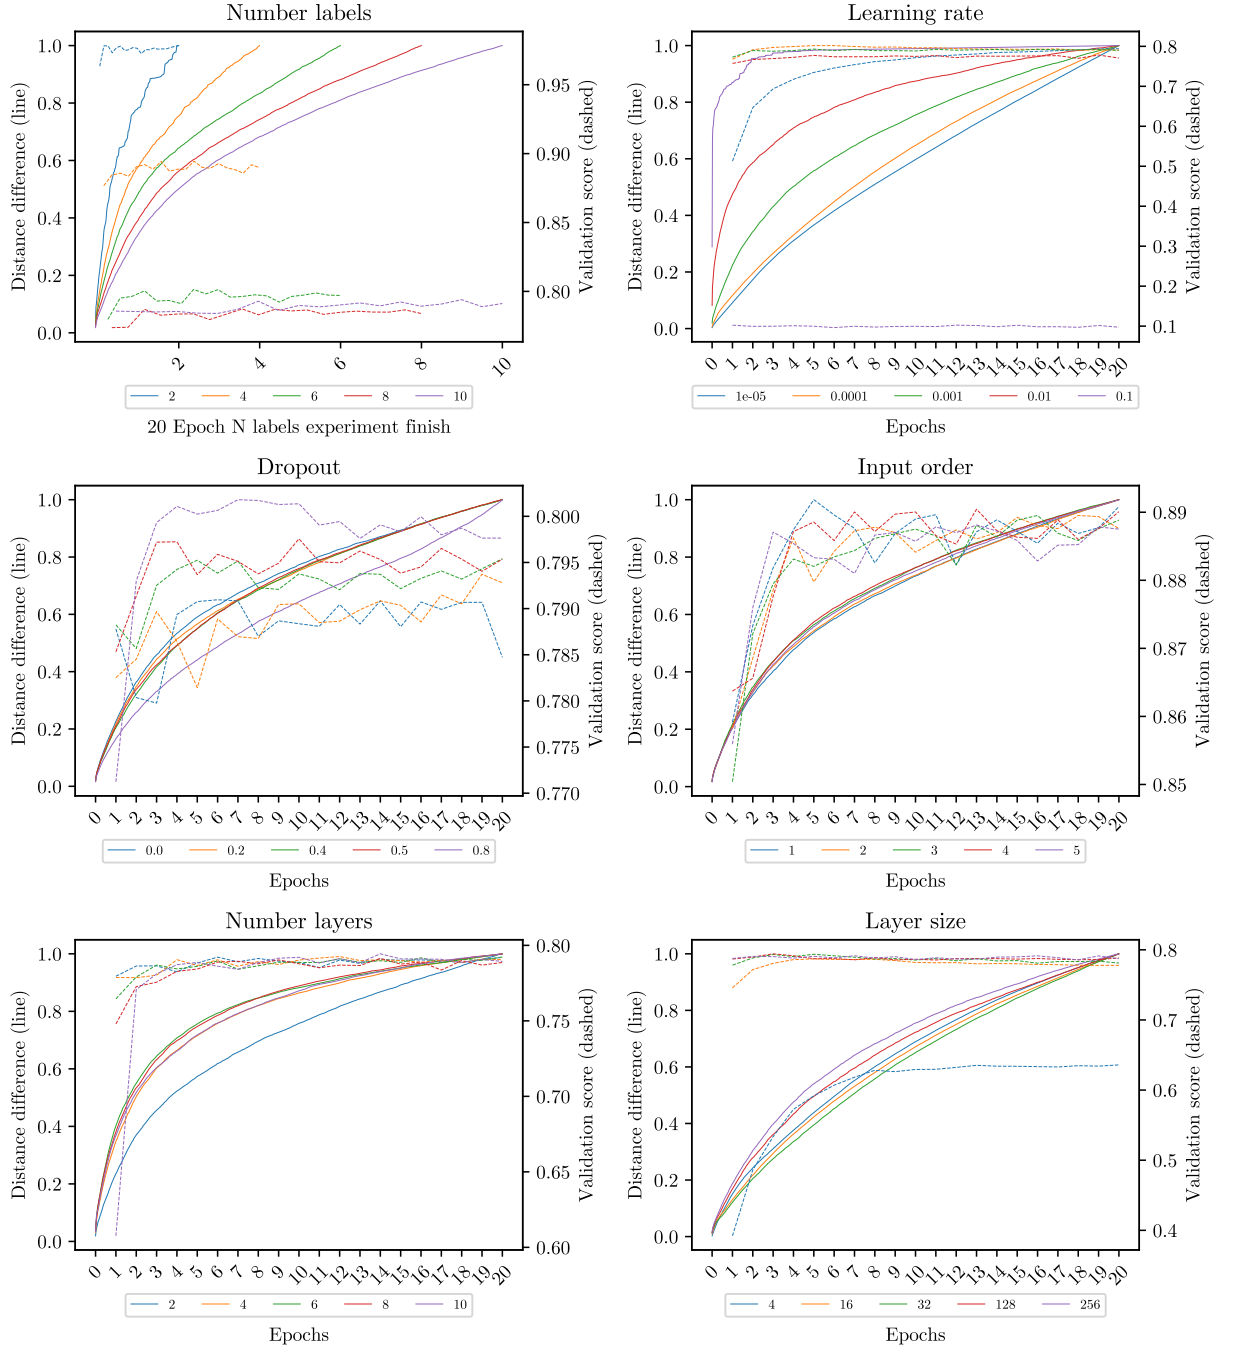

Figure 11: CIFAR-10 CNN cumulative using Silhouette discretization.

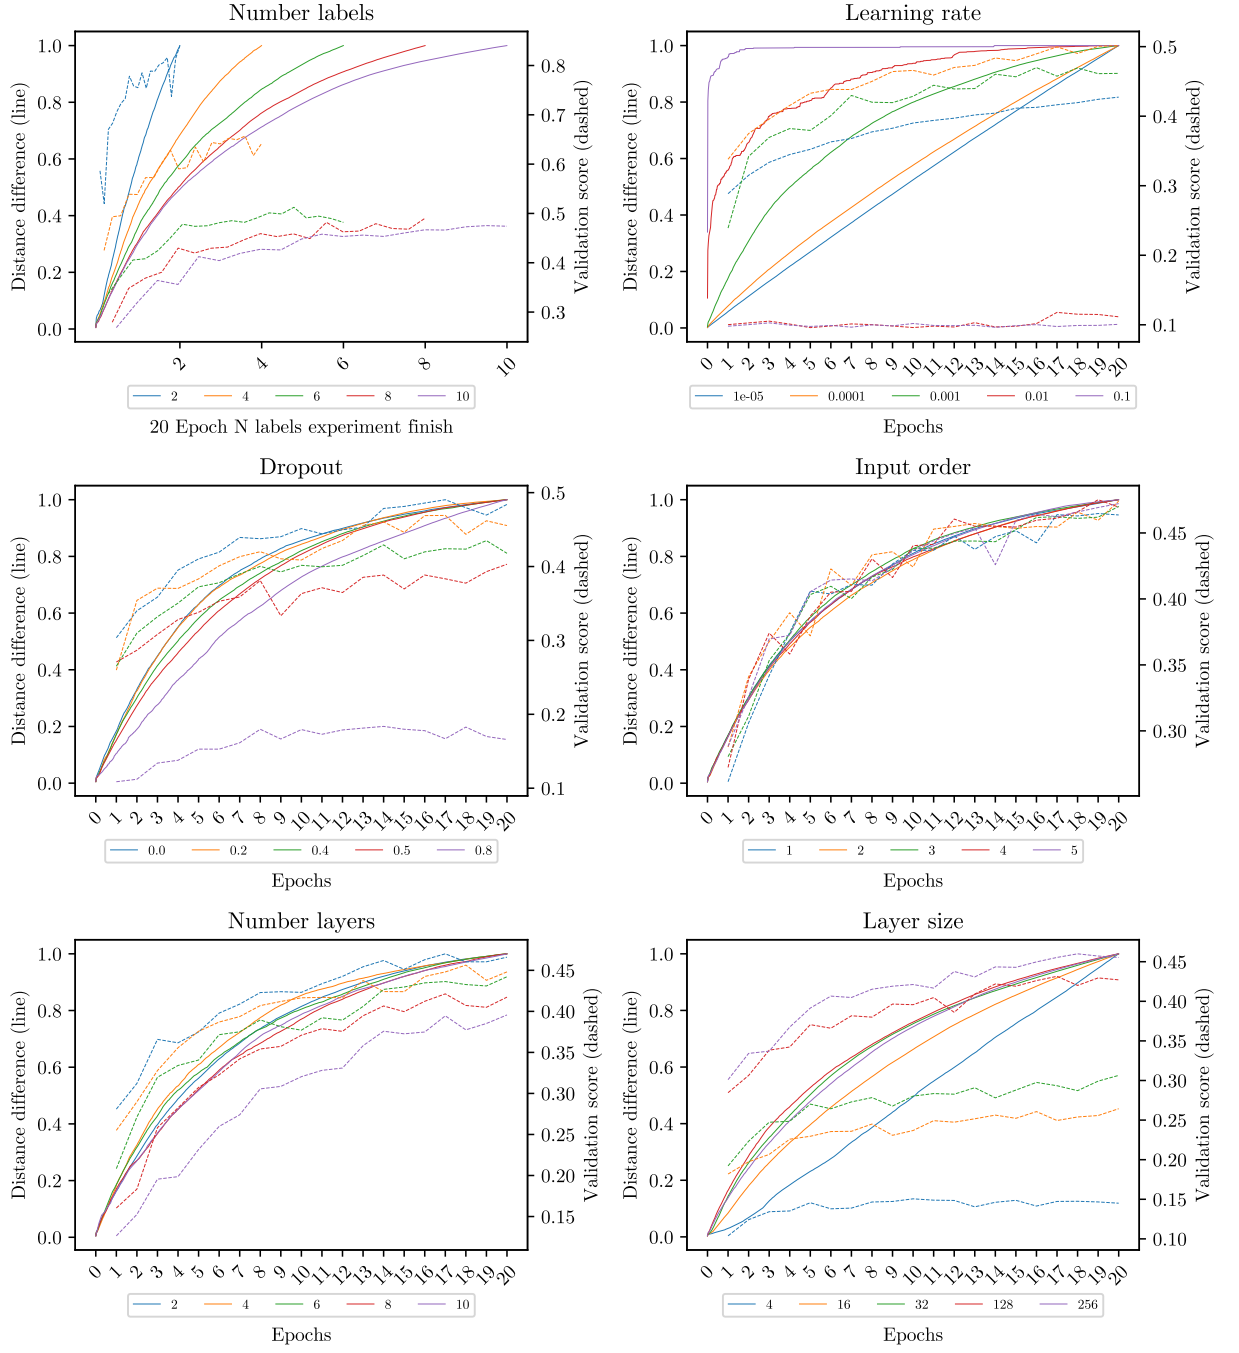

Figure 12: CIFAR-10 MLP cumulative using Heat discretization.



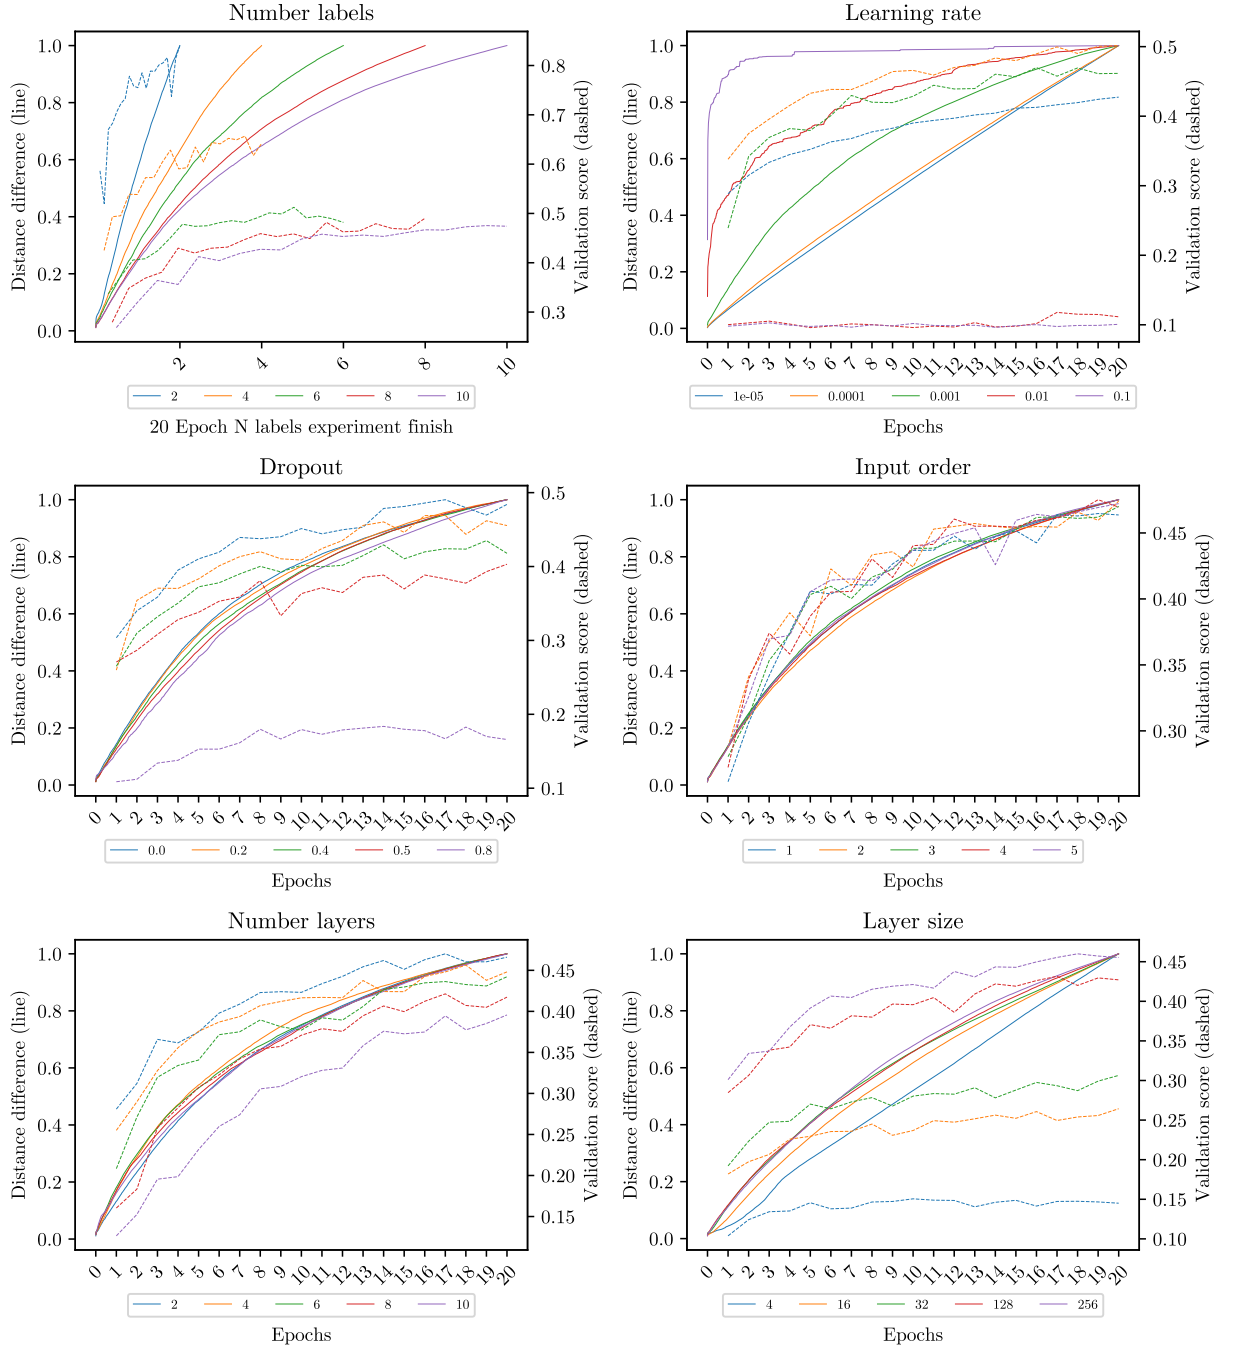

Figure 13: CIFAR-10 MLP cumulative using Silhouette discretization.

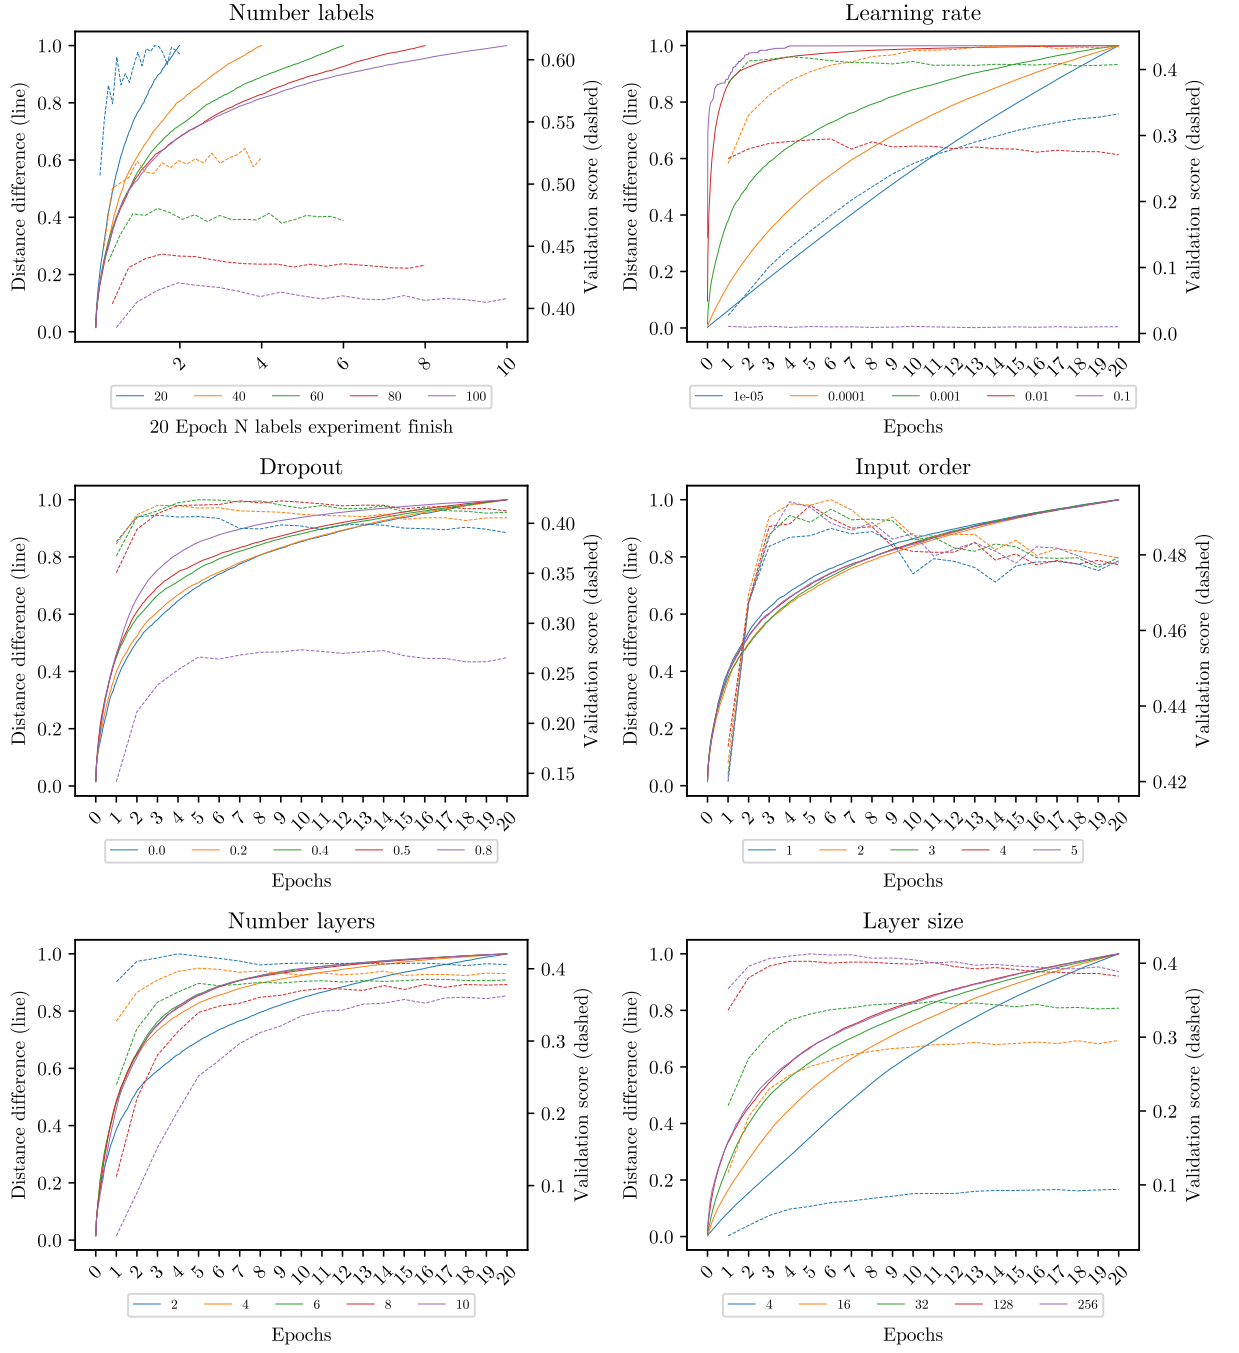

Figure 14: CIFAR-100 CNN cumulative using Heat discretization.

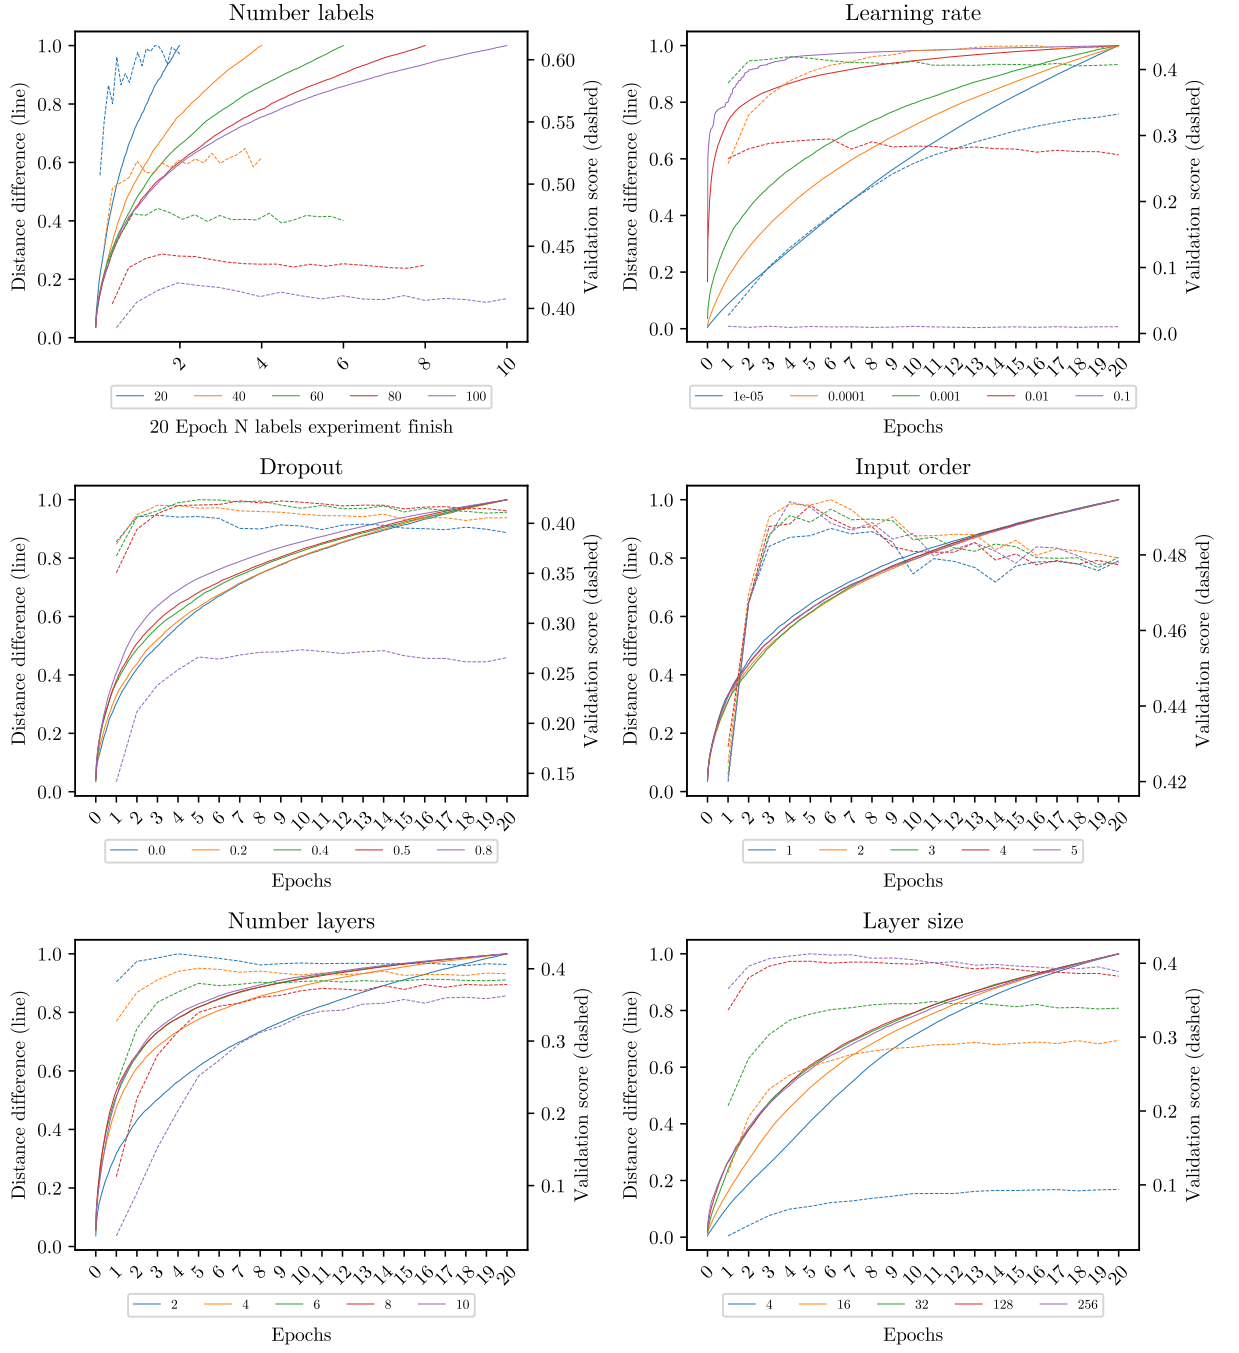

Figure 15: CIFAR-100 CNN cumulative using Silhouette discretization.

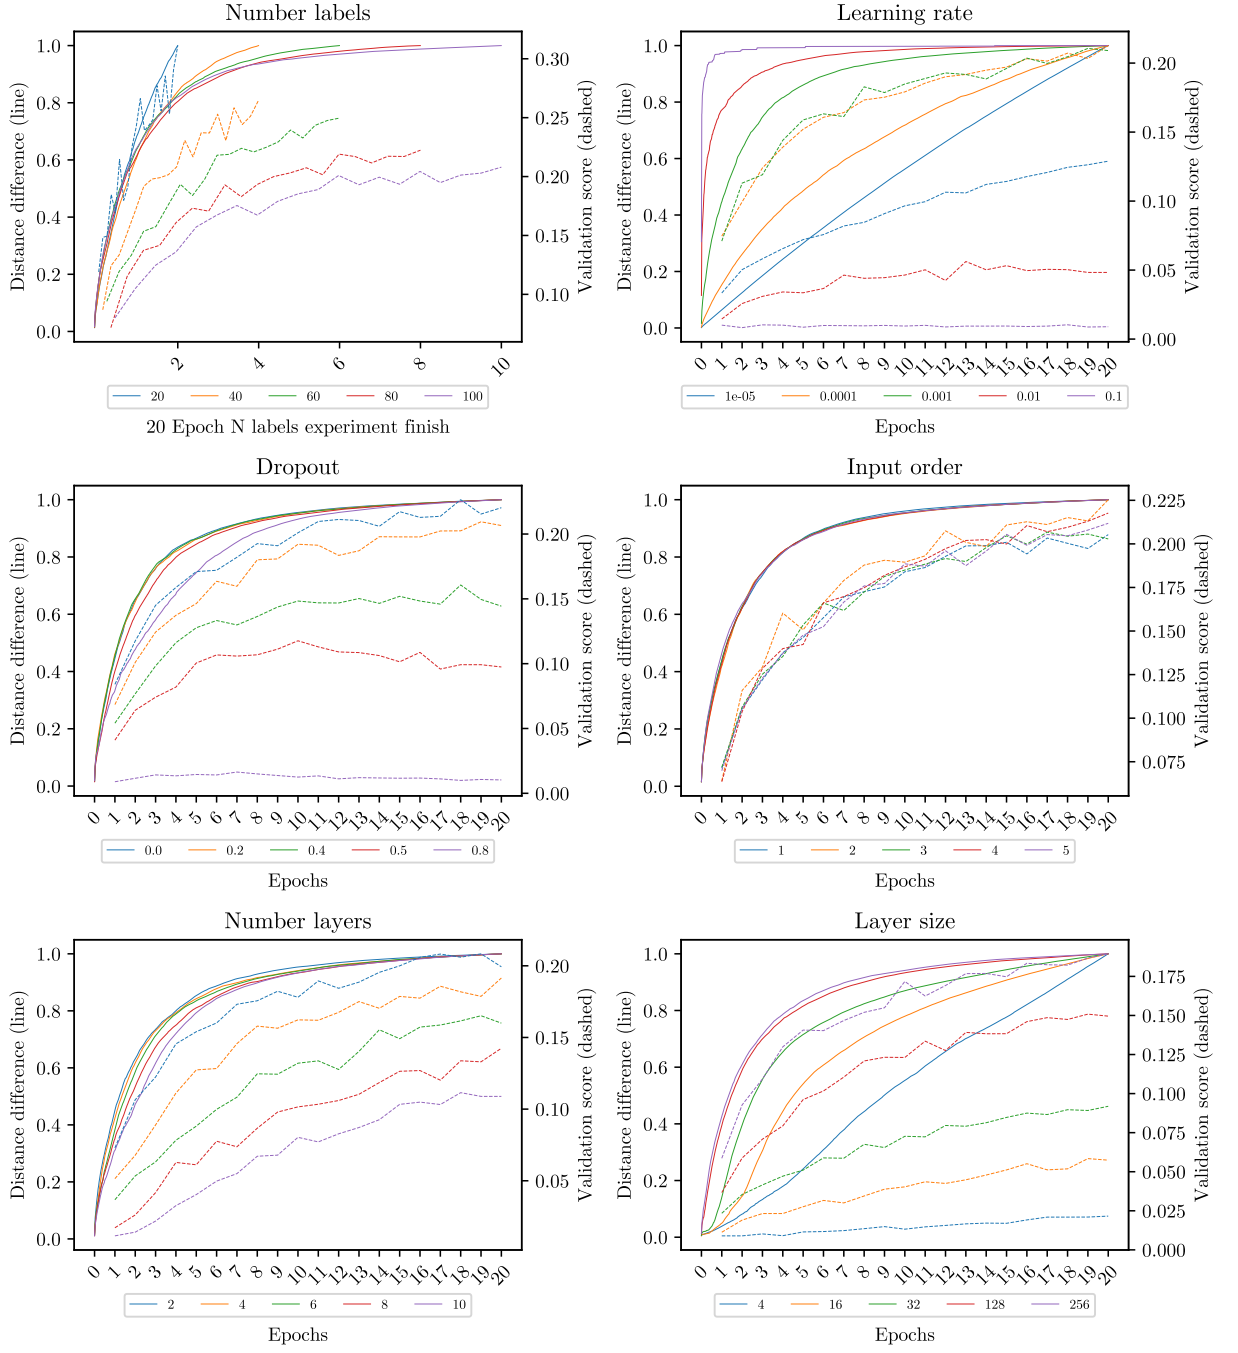

Figure 16: CIFAR-100 MLP cumulative using Heat discretization.

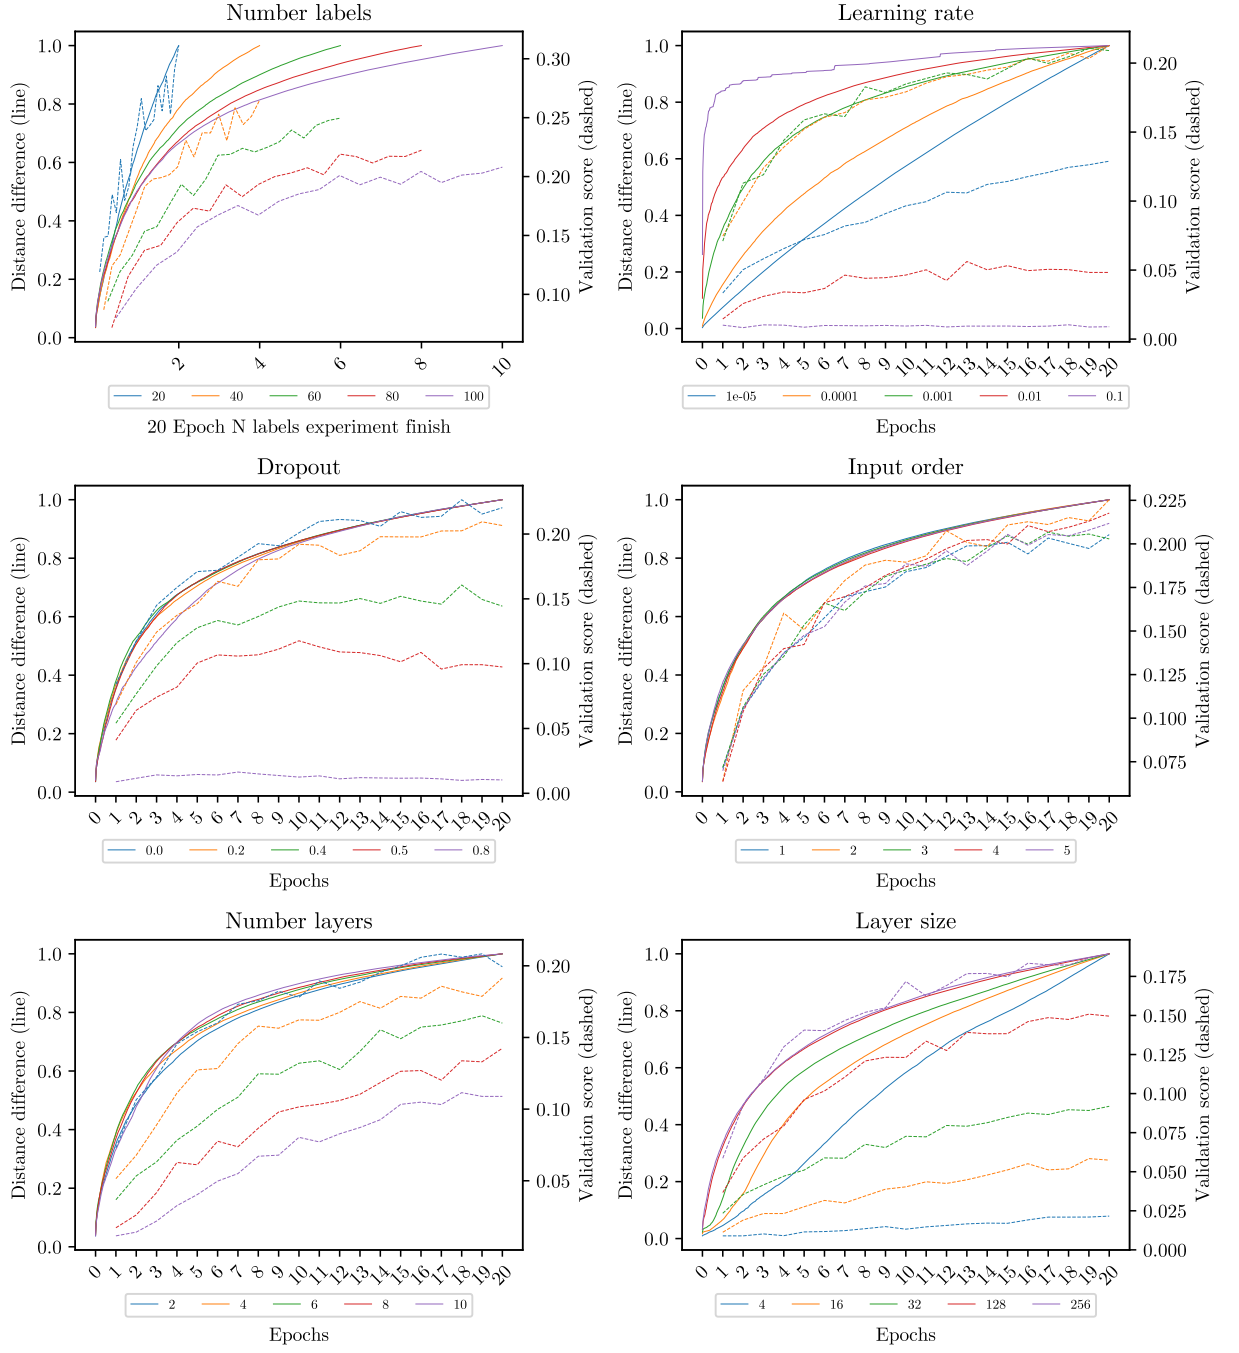

Figure 17: CIFAR-100 MLP cumulative using Silhouette discretization.

## CUMULATIVE PLOTS WITHOUT NORMALIZATION

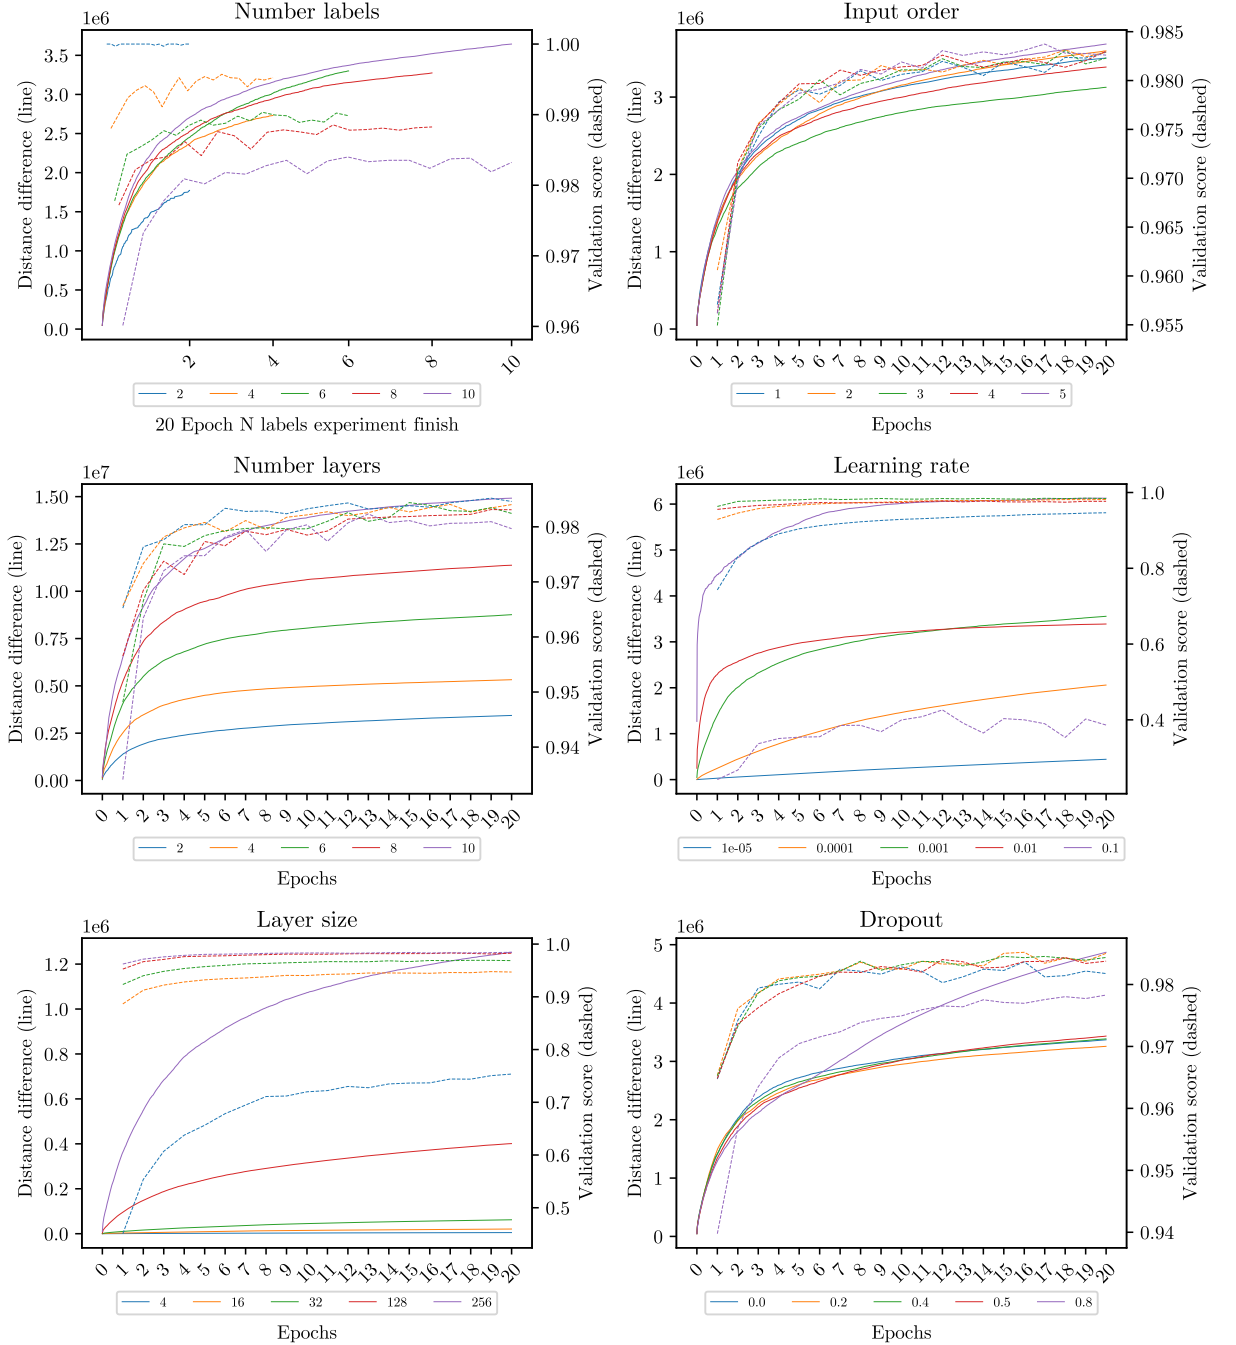

Figure 18: MNIST cumulative using Heat discretization.

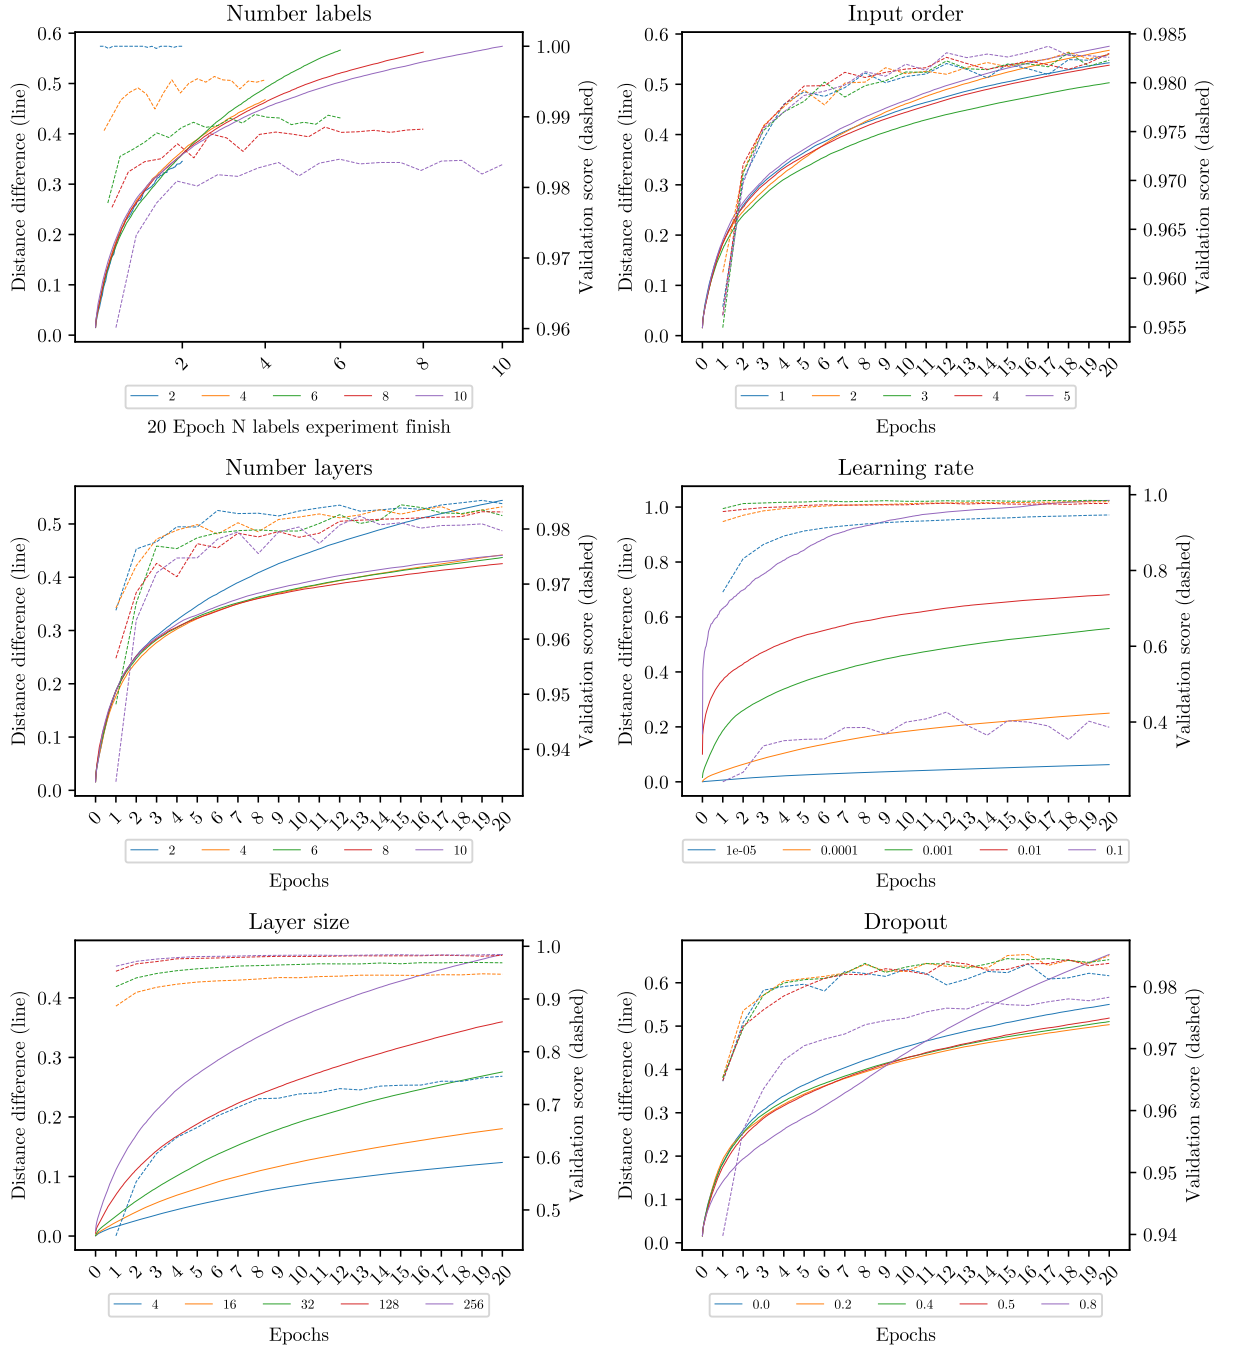

Figure 19: MNIST cumulative using Silhouette discretization.

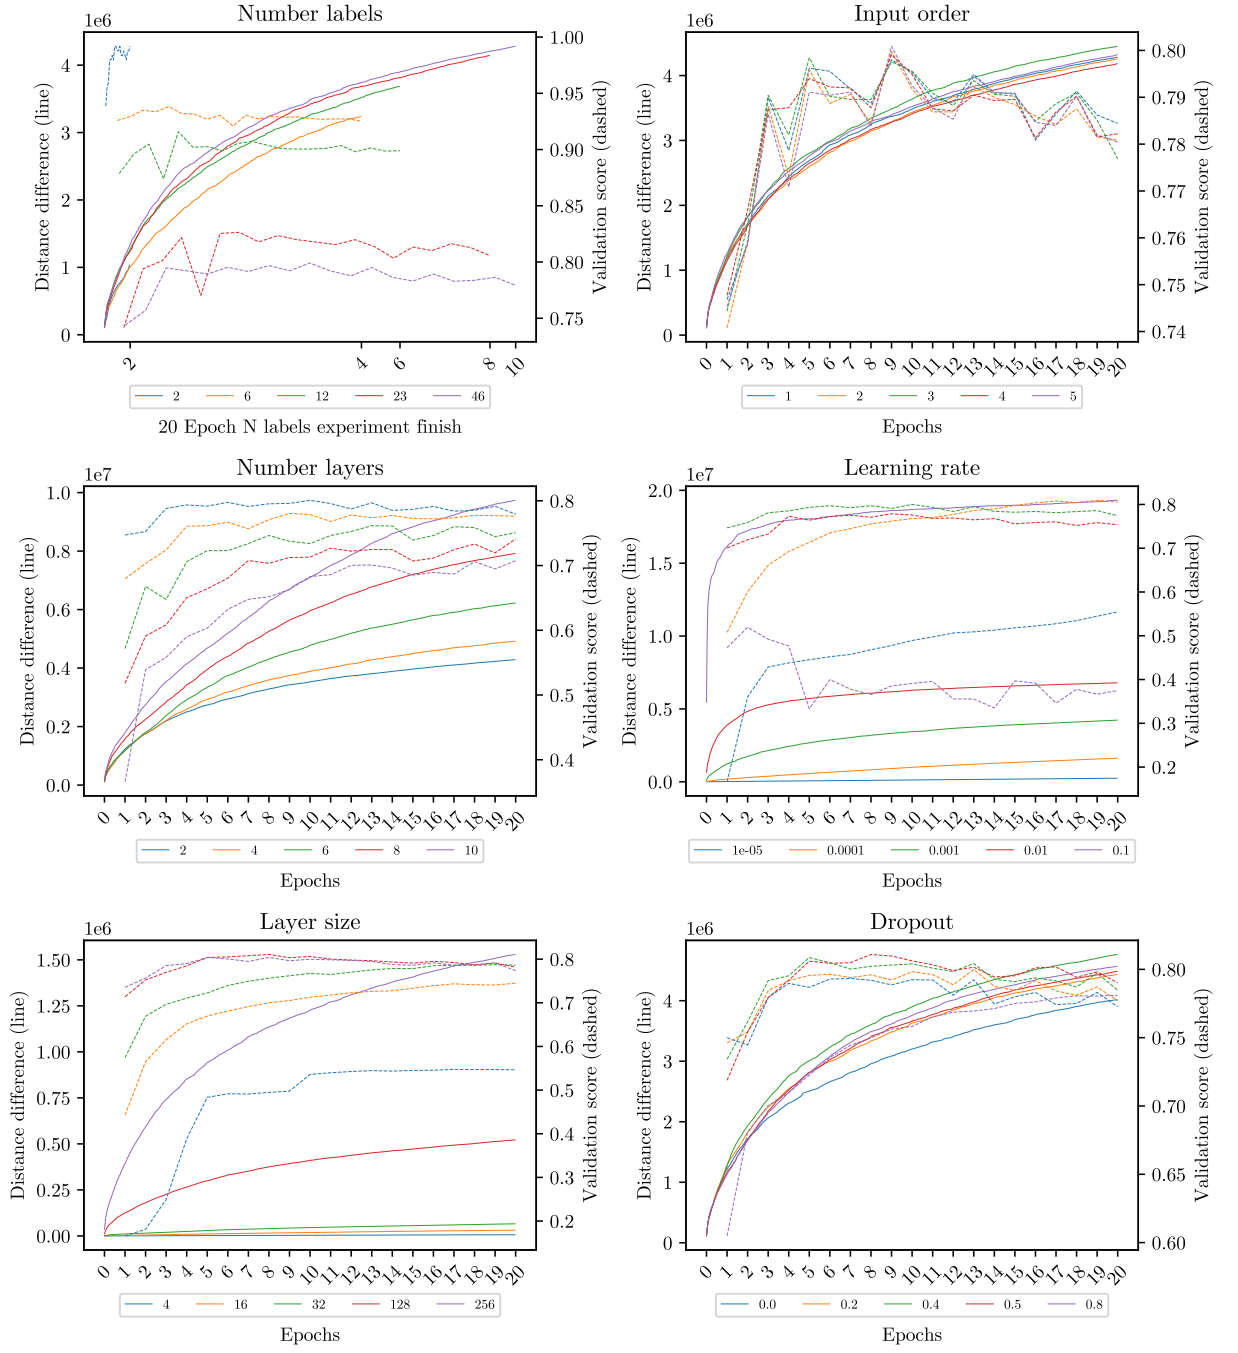

Figure 20: Reuters cumulative using Heat discretization.



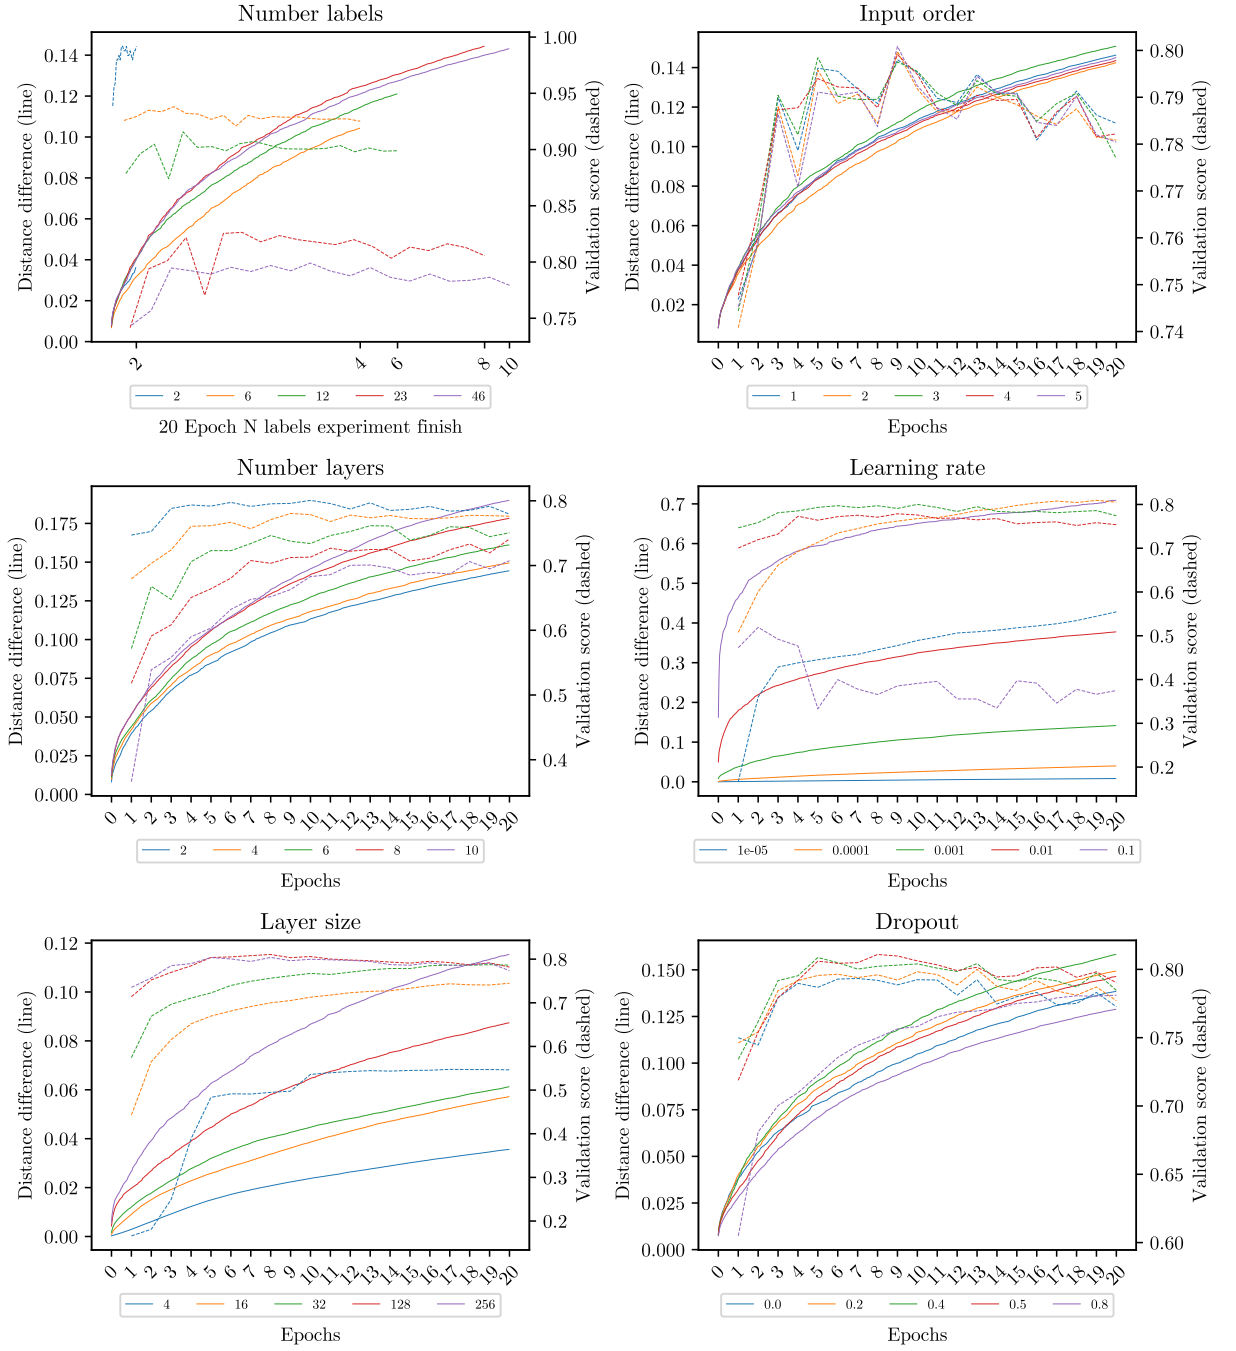

Figure 21: Reuters cumulative using Silhouette discretization.

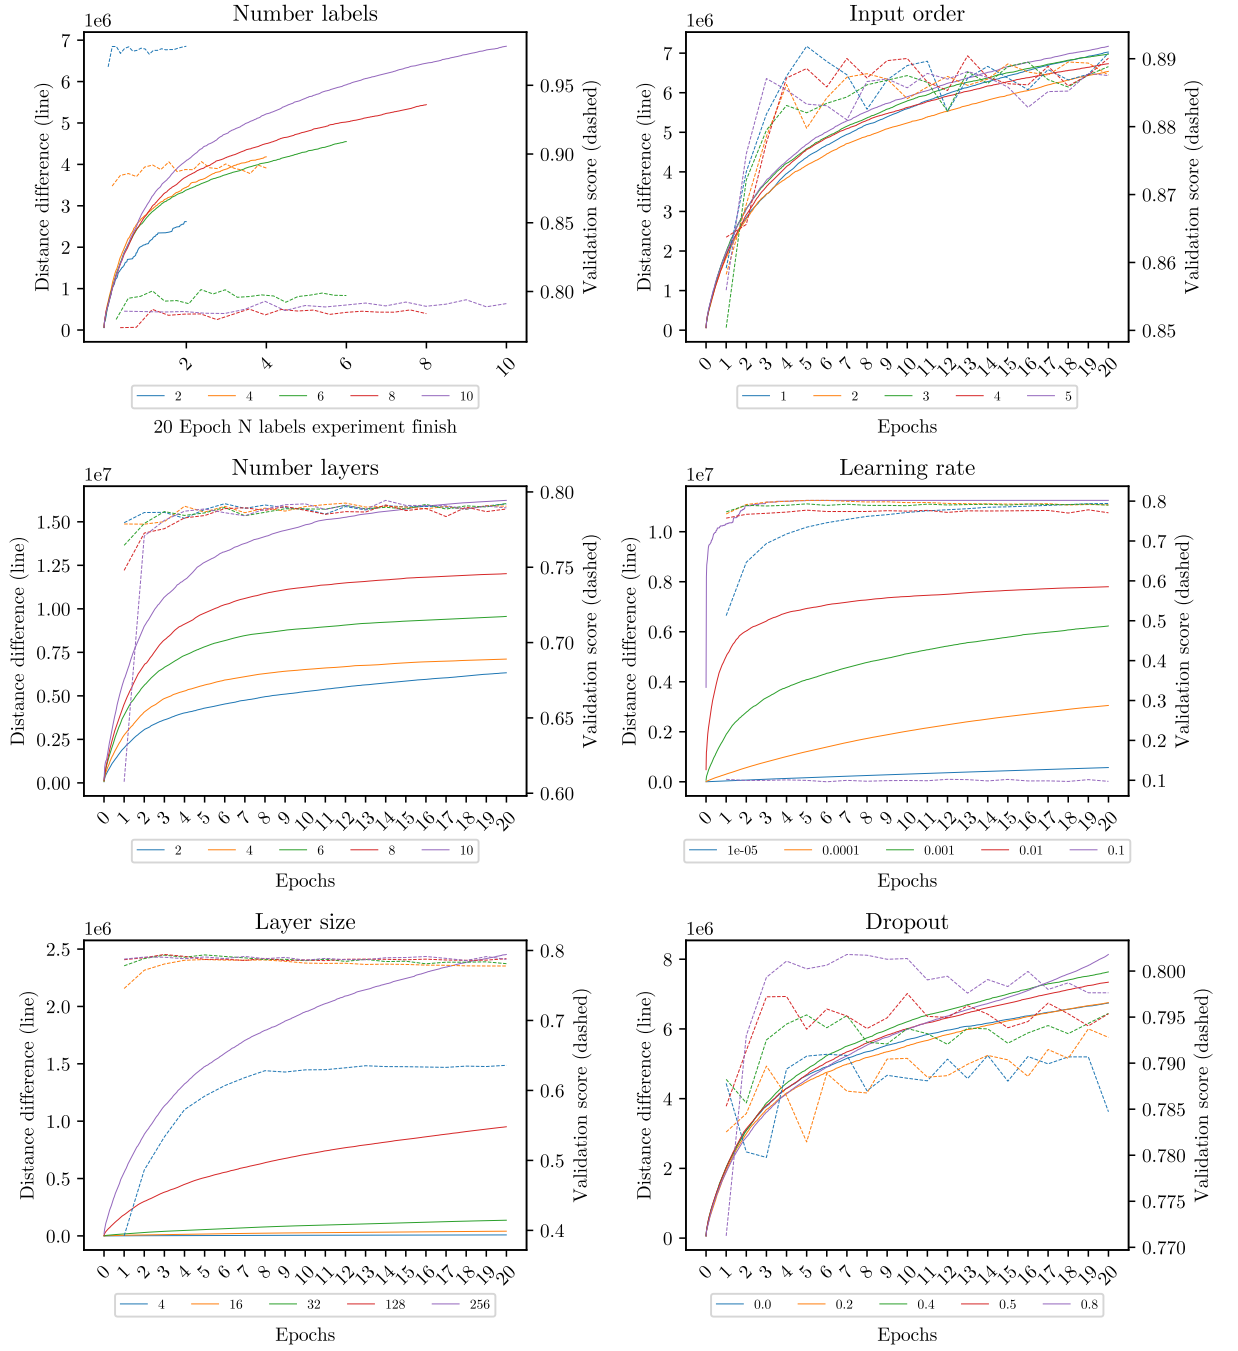

Figure 22: CIFAR-10 CNN cumulative no normalized using Heat discretization.

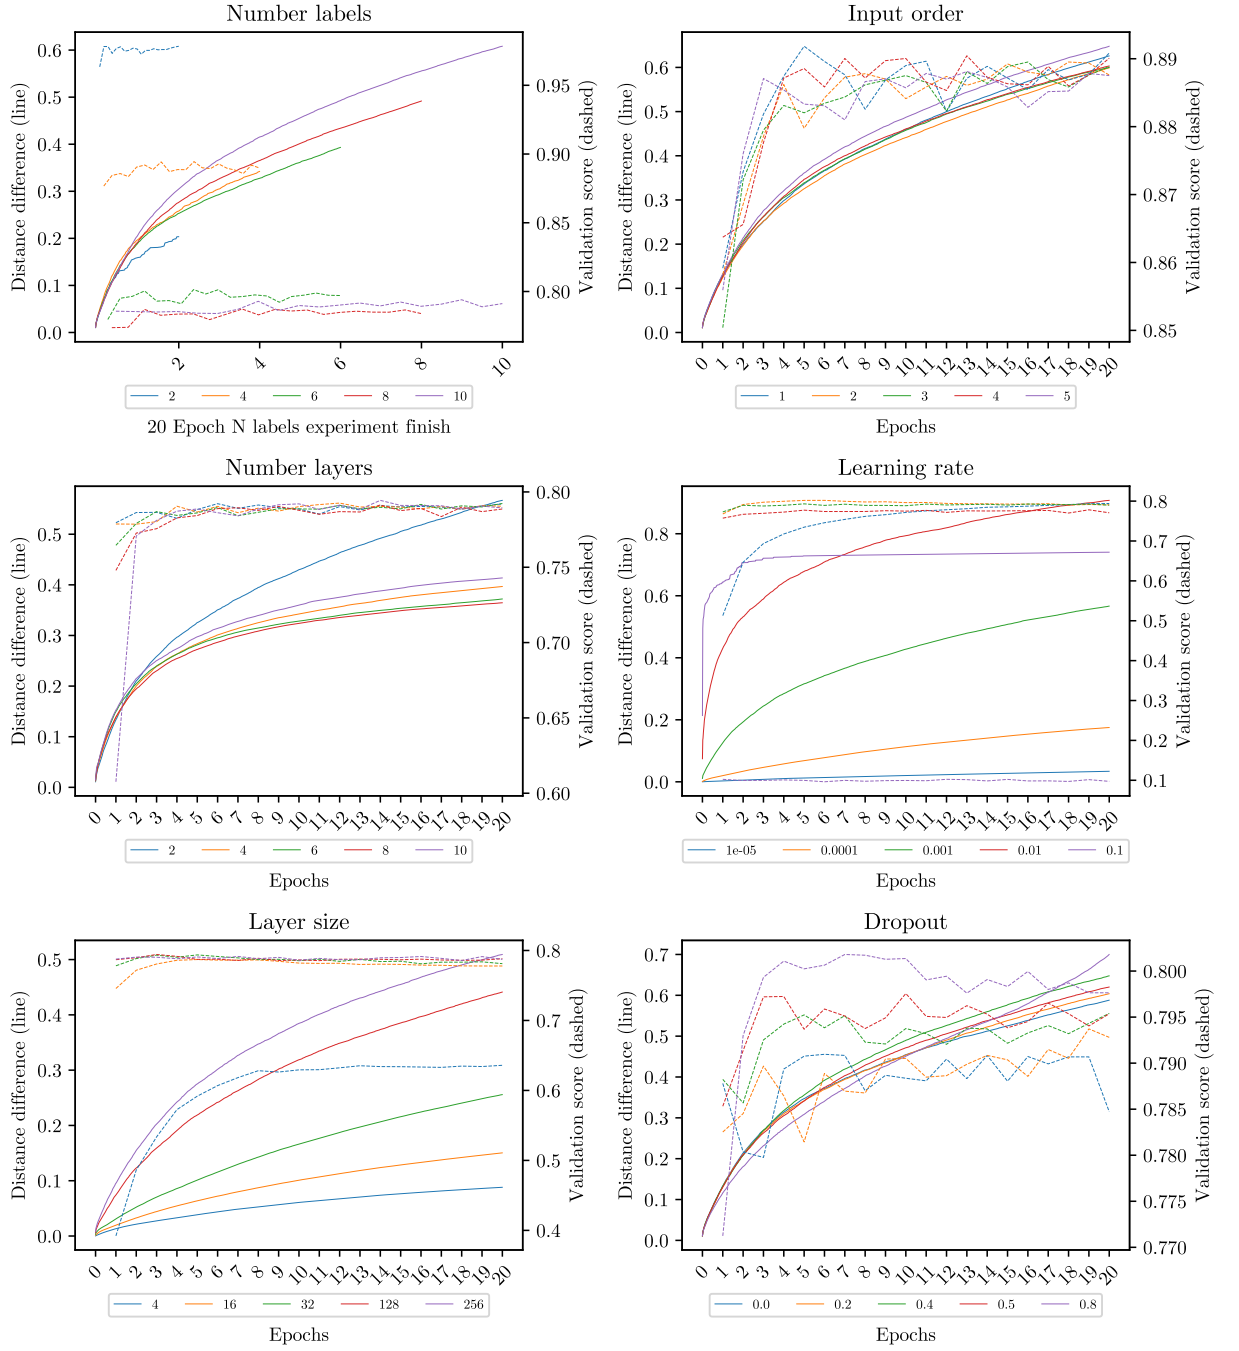

Figure 23: CIFAR-10 CNN cumulative no normalized using Silhouette discretization.

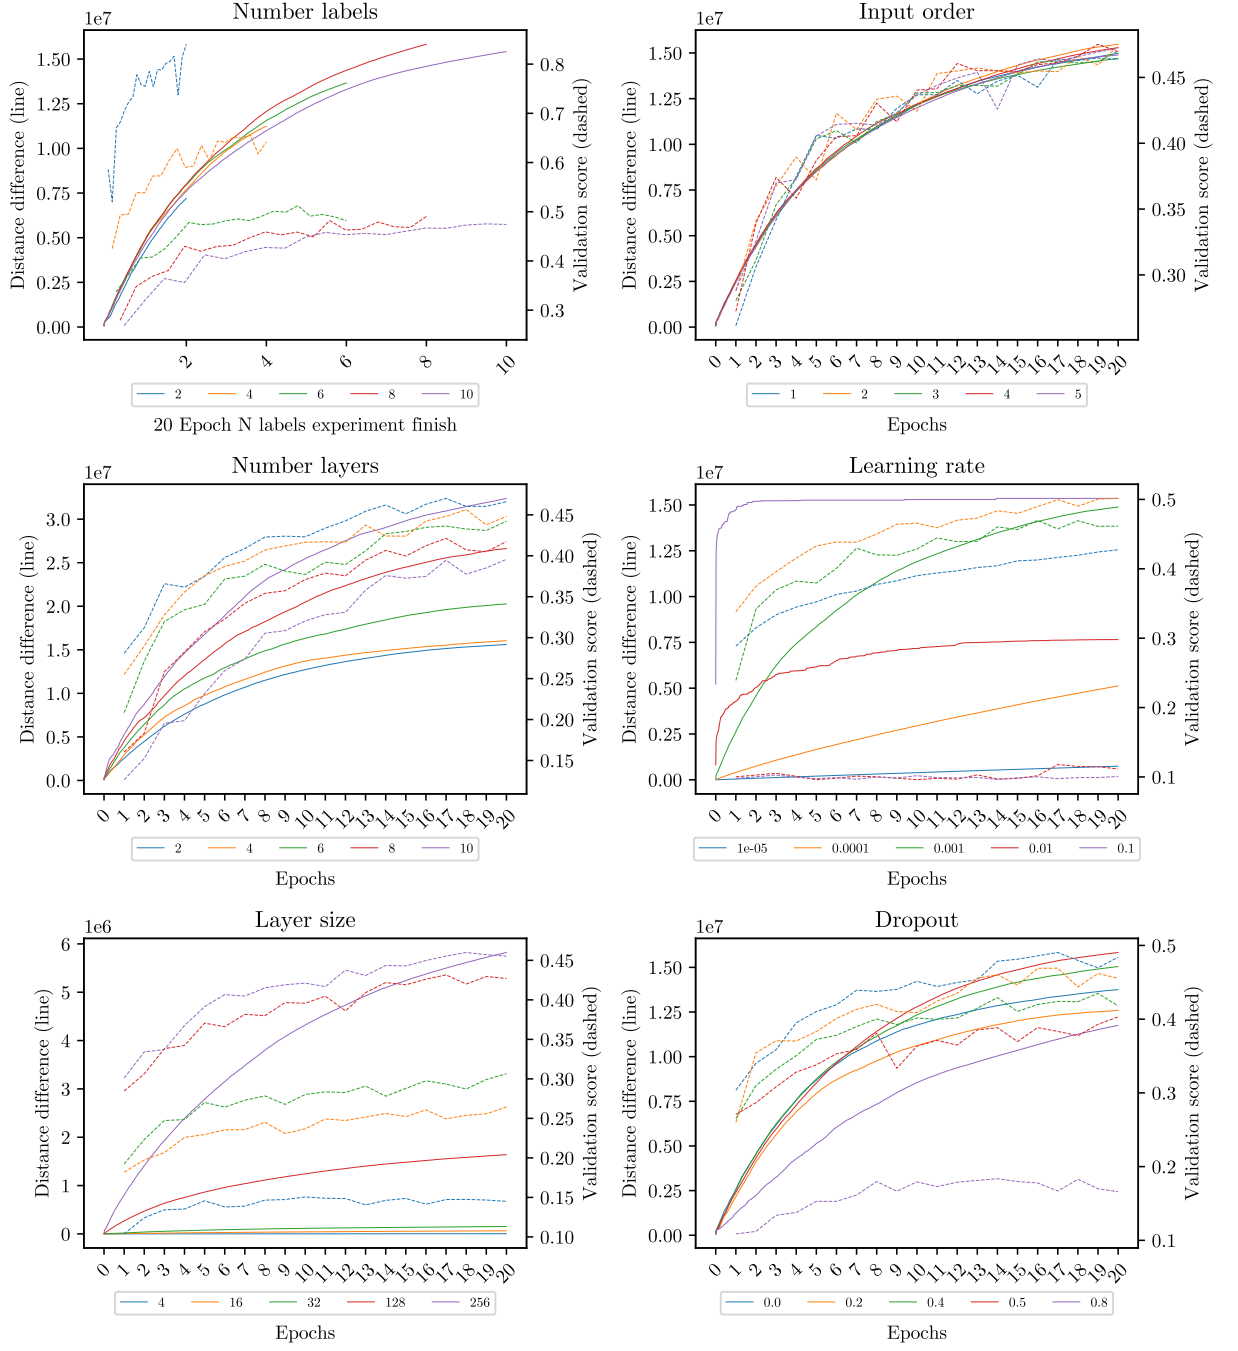

Figure 24: CIFAR-10 MLP cumulative no normalized using Heat discretization.

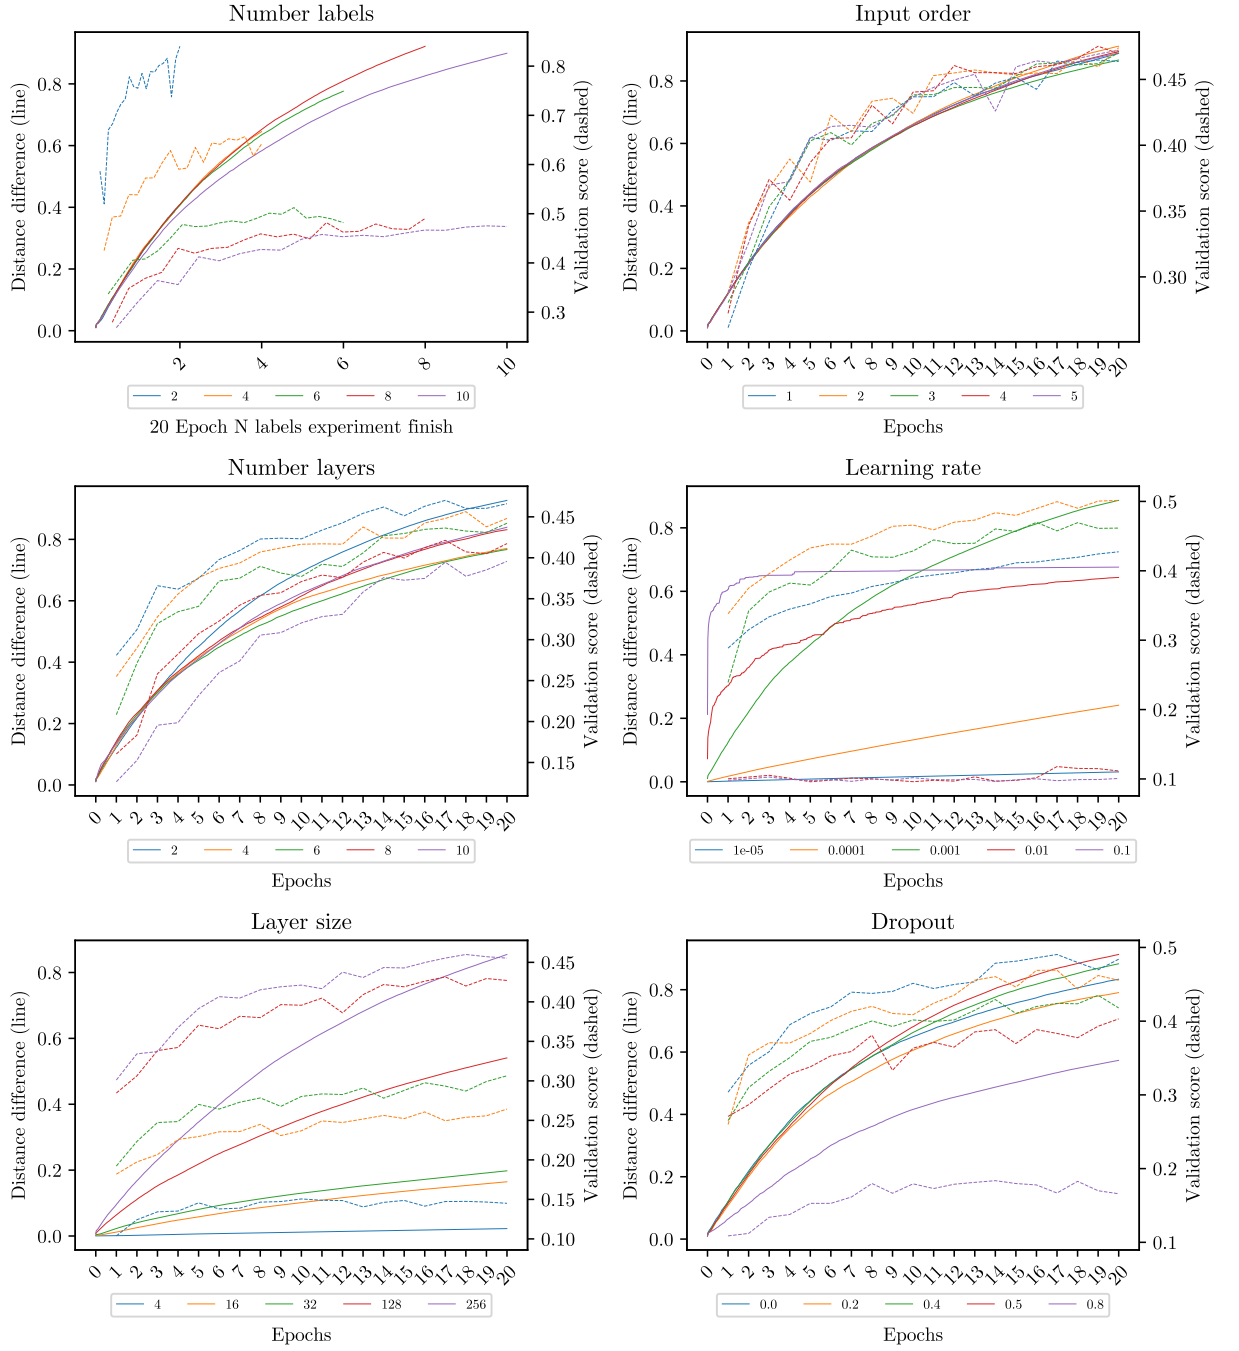

Figure 25: CIFAR-10 MLP cumulative no normalized using Silhouette discretization.

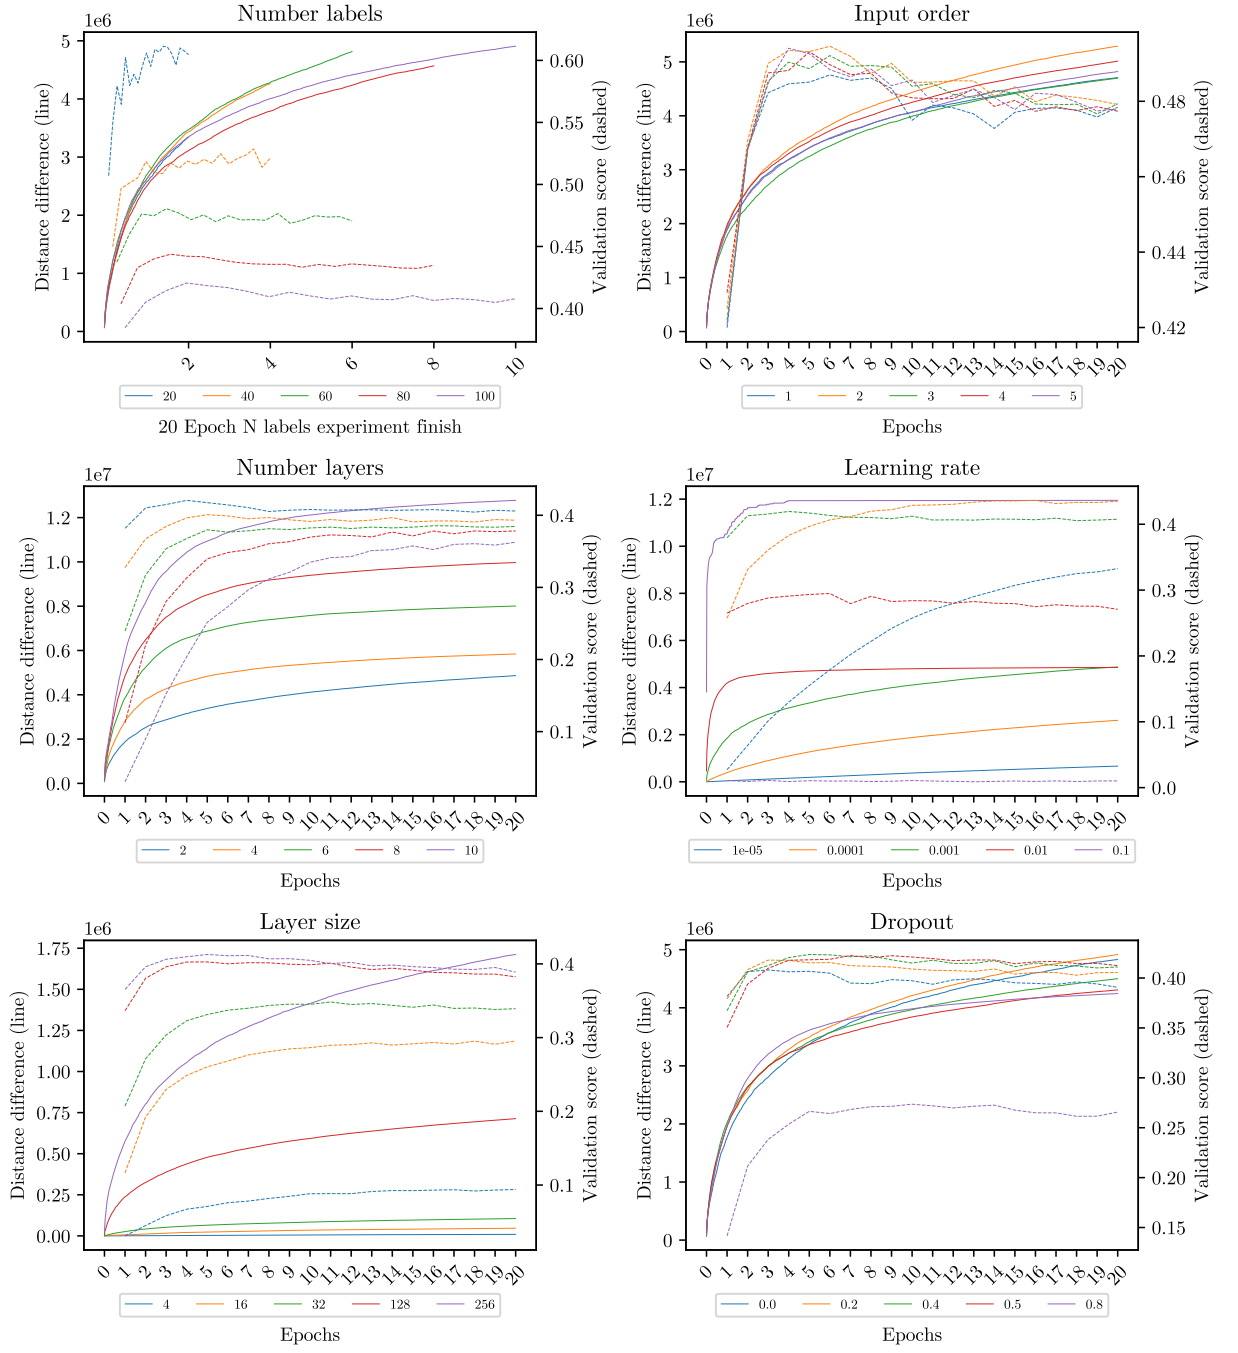

Figure 26: CIFAR-100 CNN cumulative no normalized using Heat discretization.

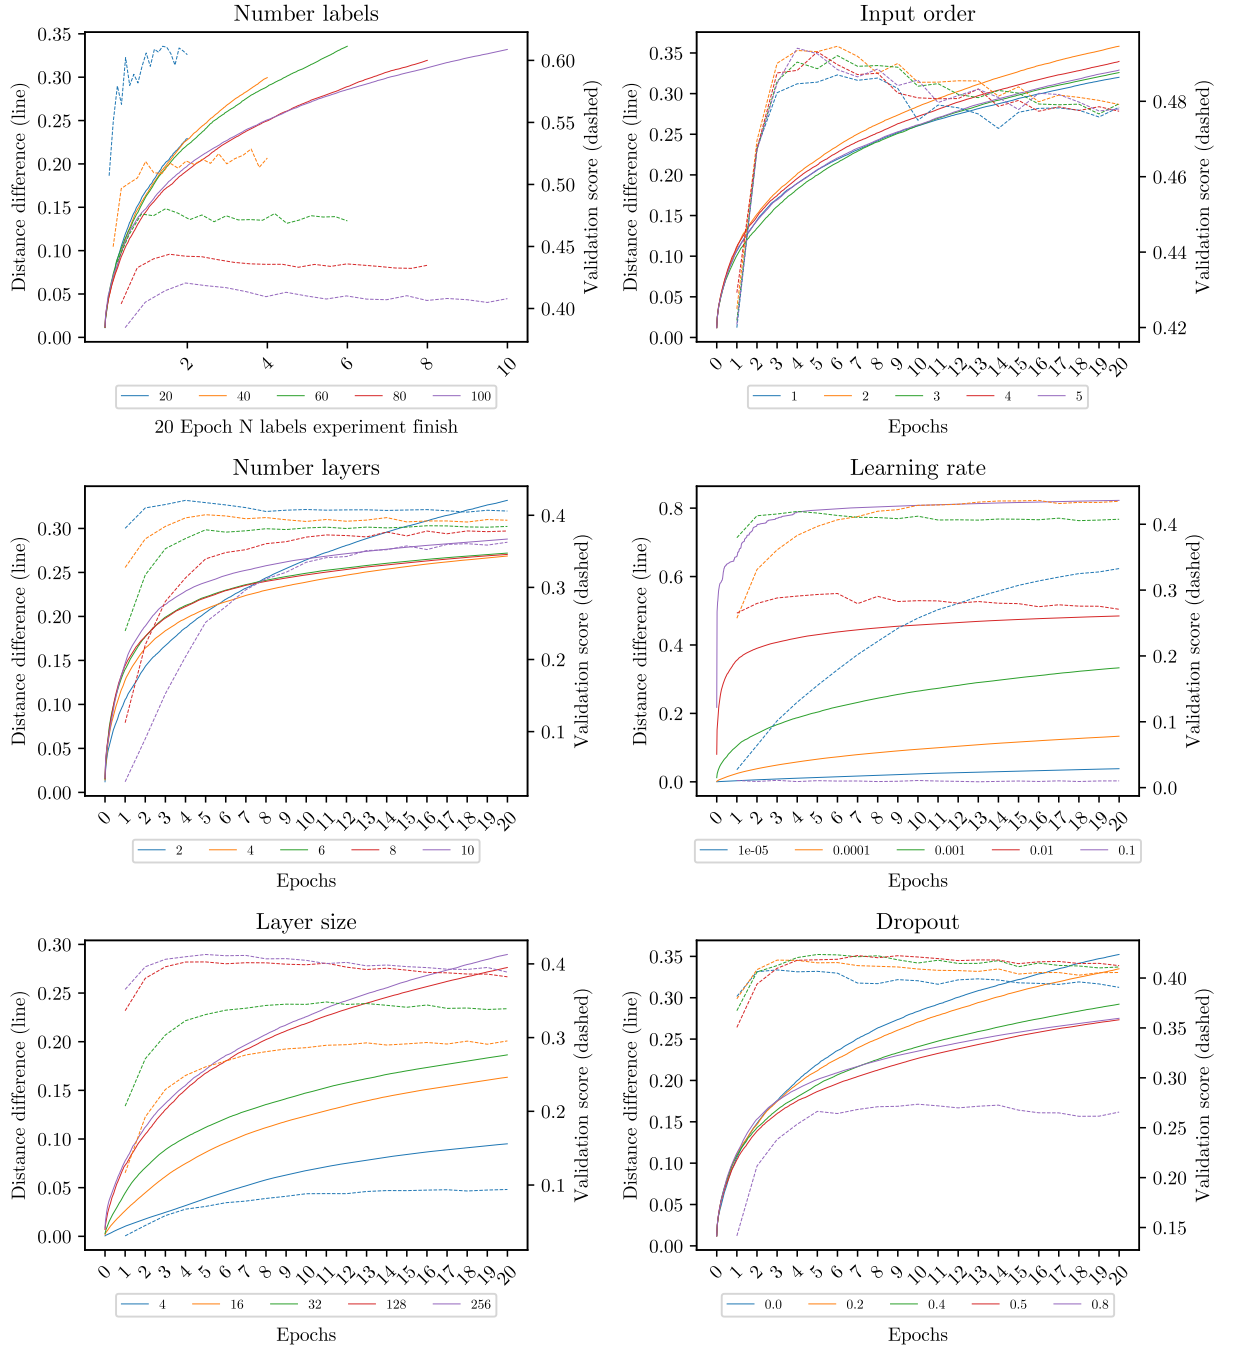

Figure 27: CIFAR-100 CNN cumulative no normalized using Silhouette discretization.

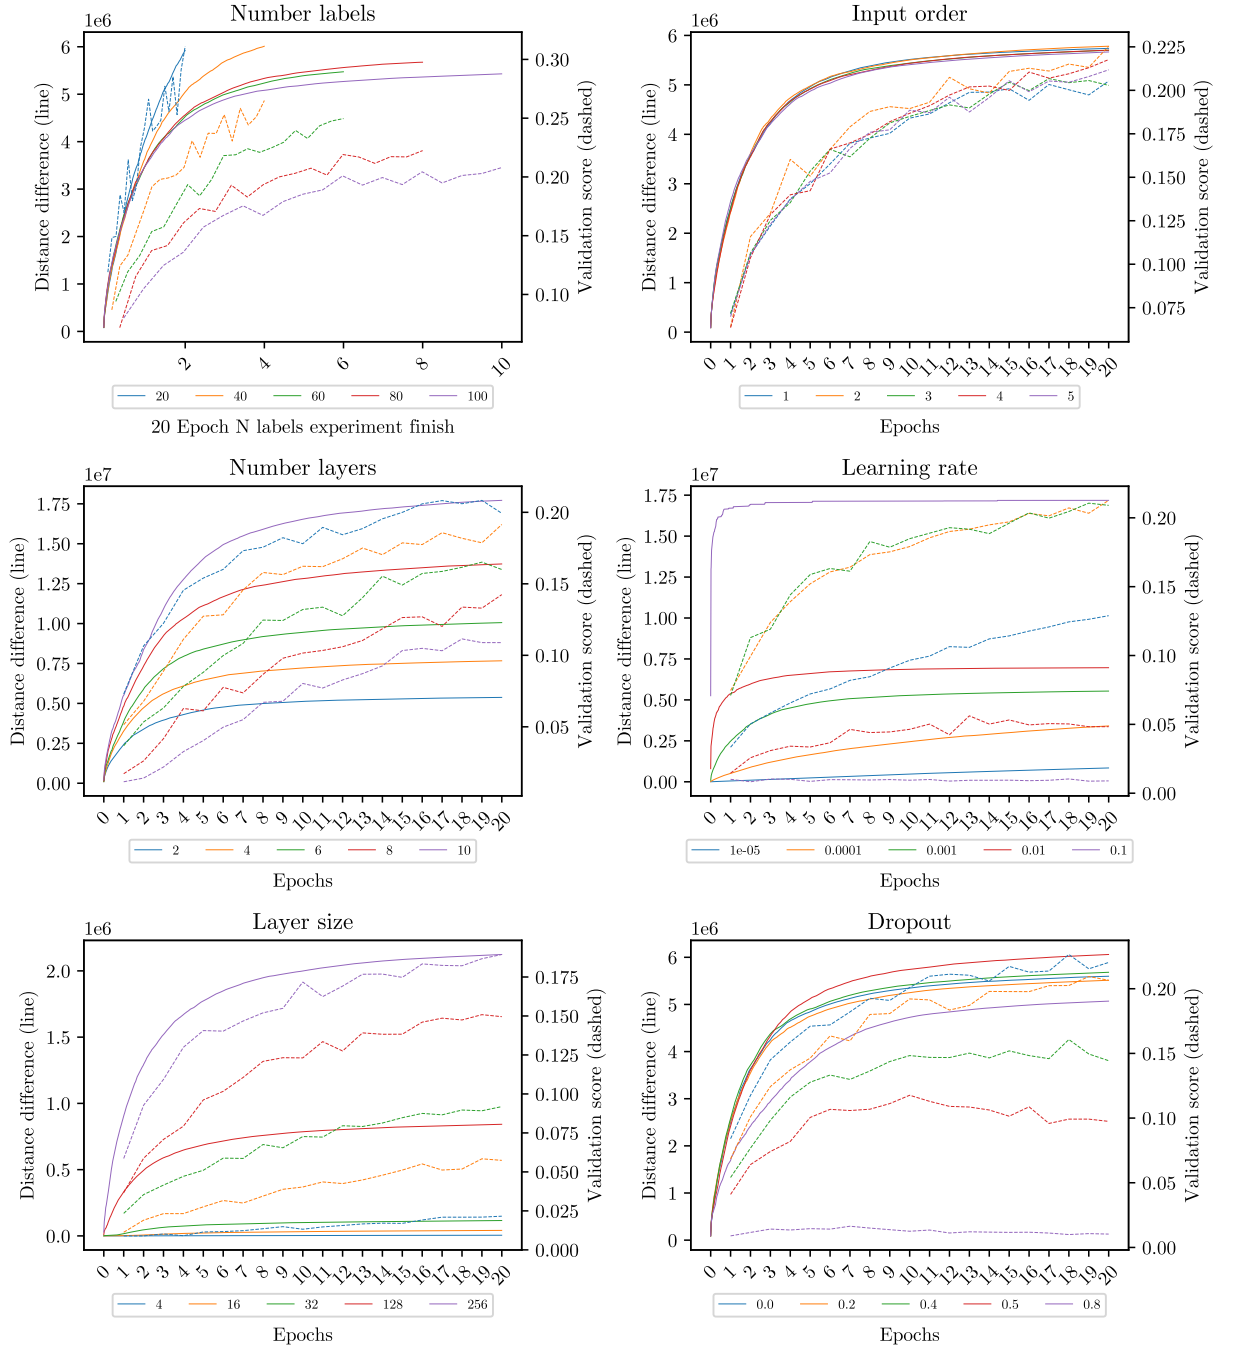

Figure 28: CIFAR-100 MLP cumulative no normalized using Heat discretization.



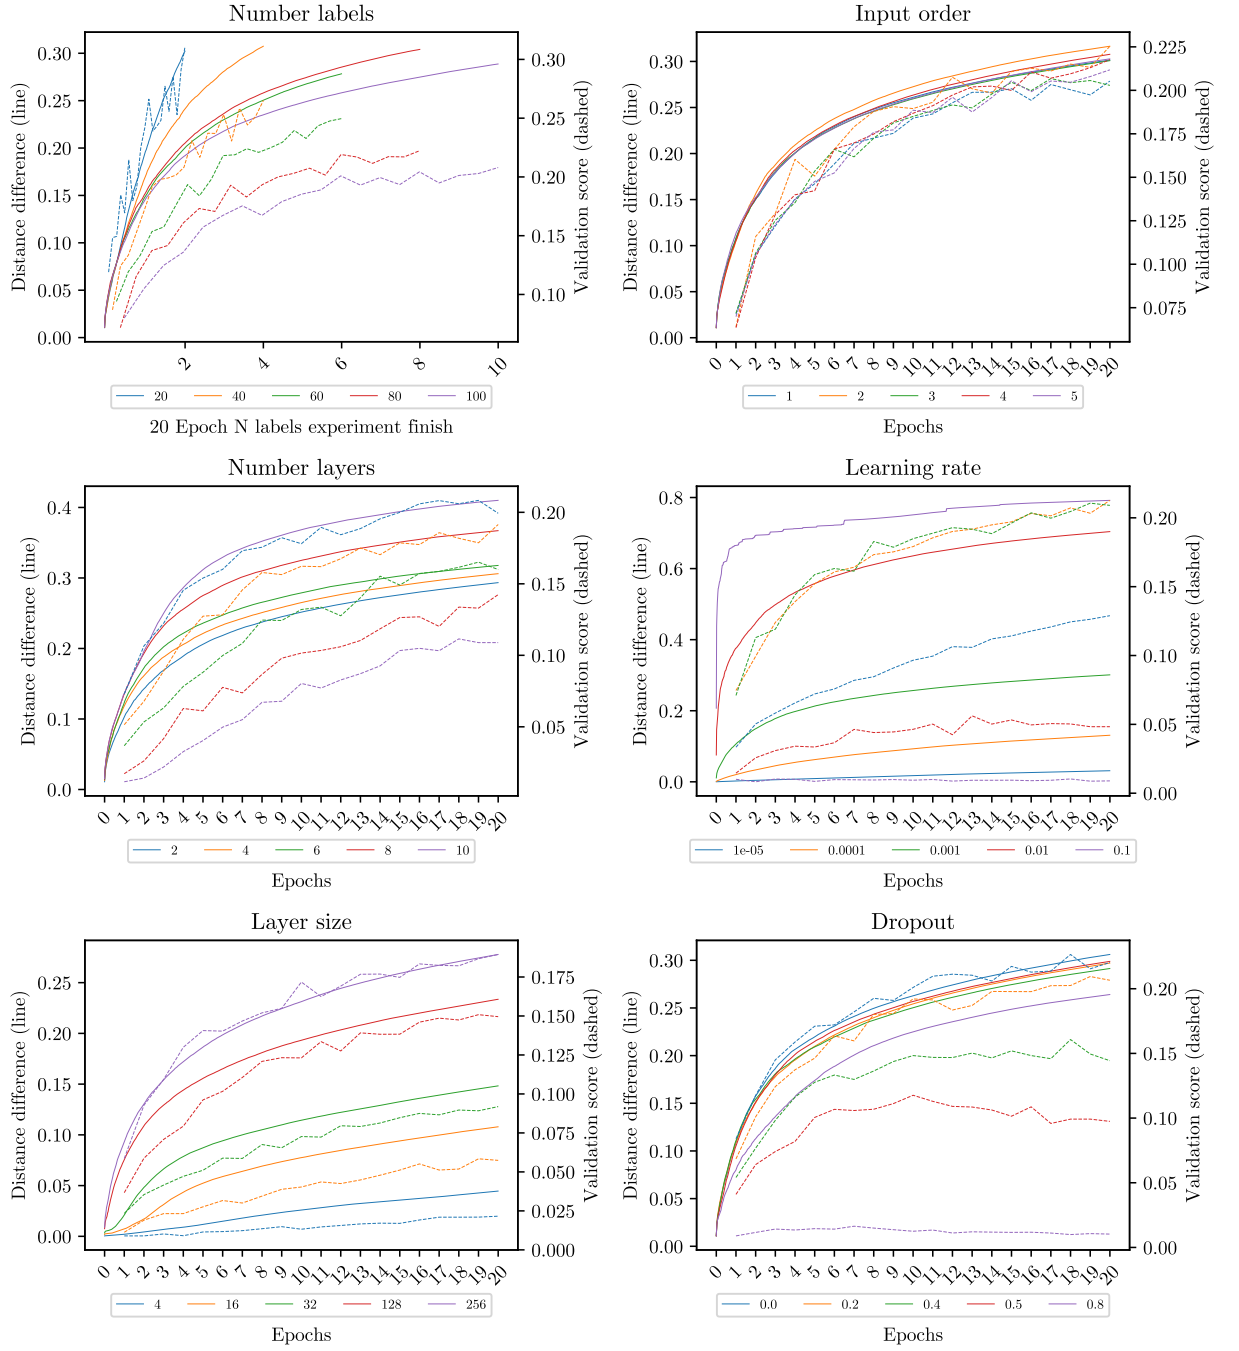

Figure 29: CIFAR-100 MLP cumulative no normalized using Silhouette discretization.

## NON-CUMULATIVE PLOTS

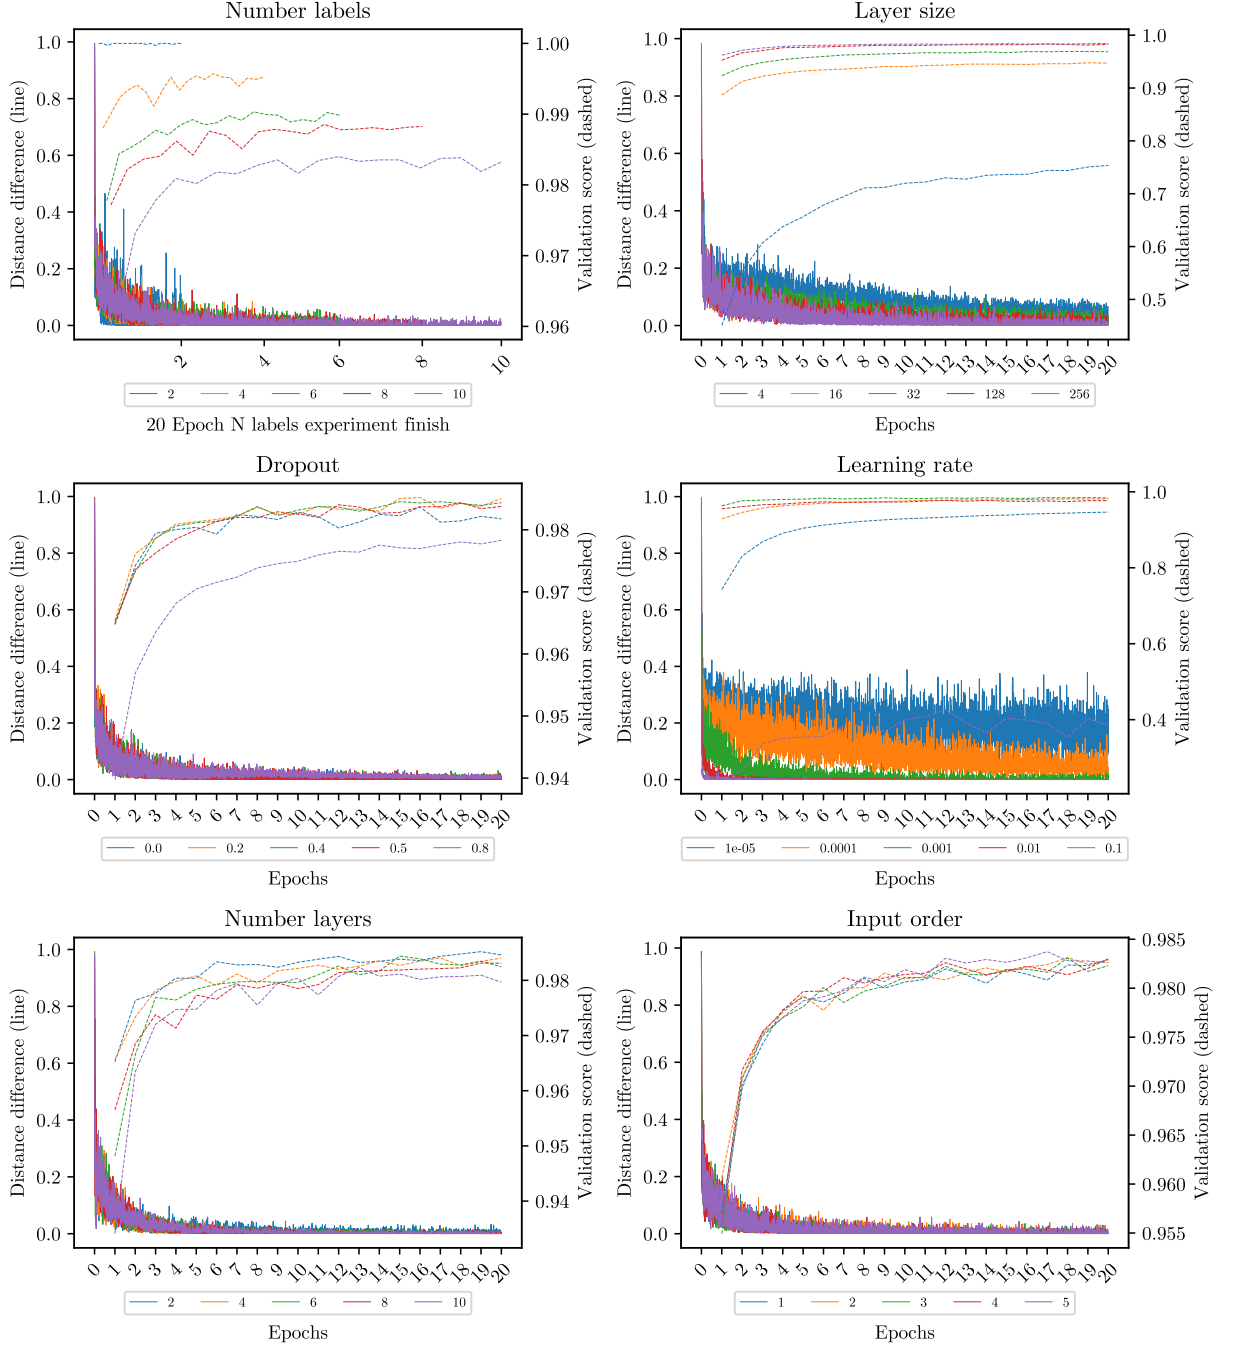

Figure 30: MNIST non-cumulative using Heat discretization.

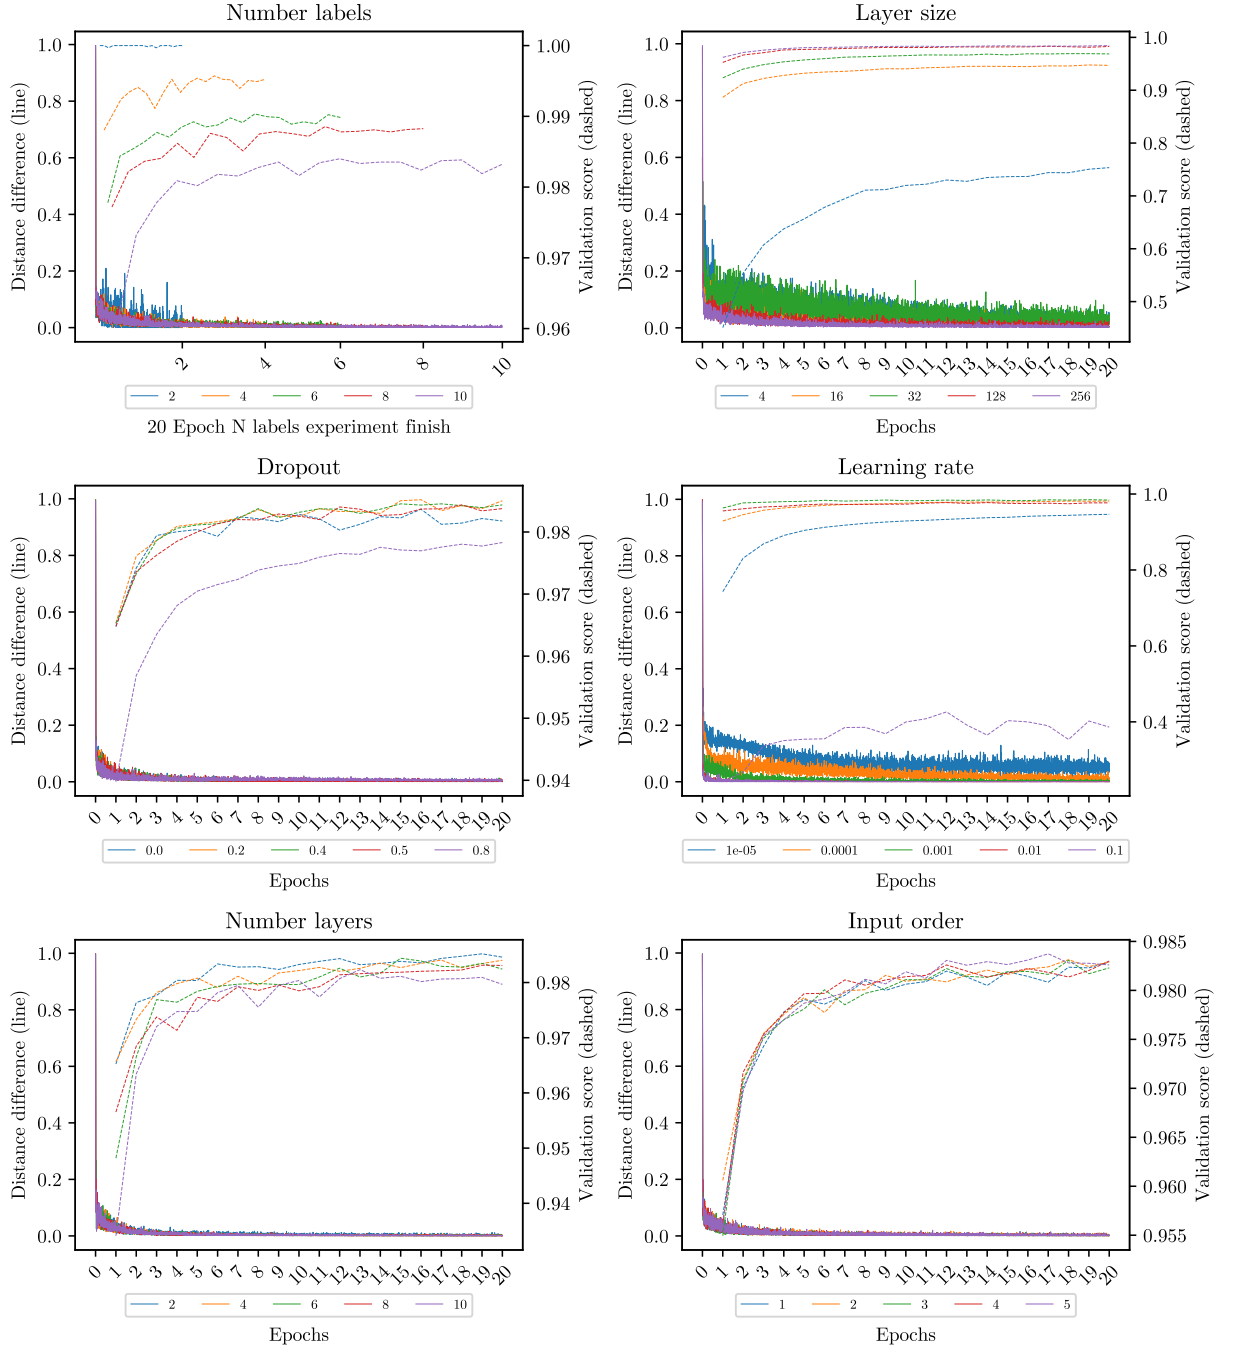

Figure 31: MNIST non-cumulative using Silhouette discretization.

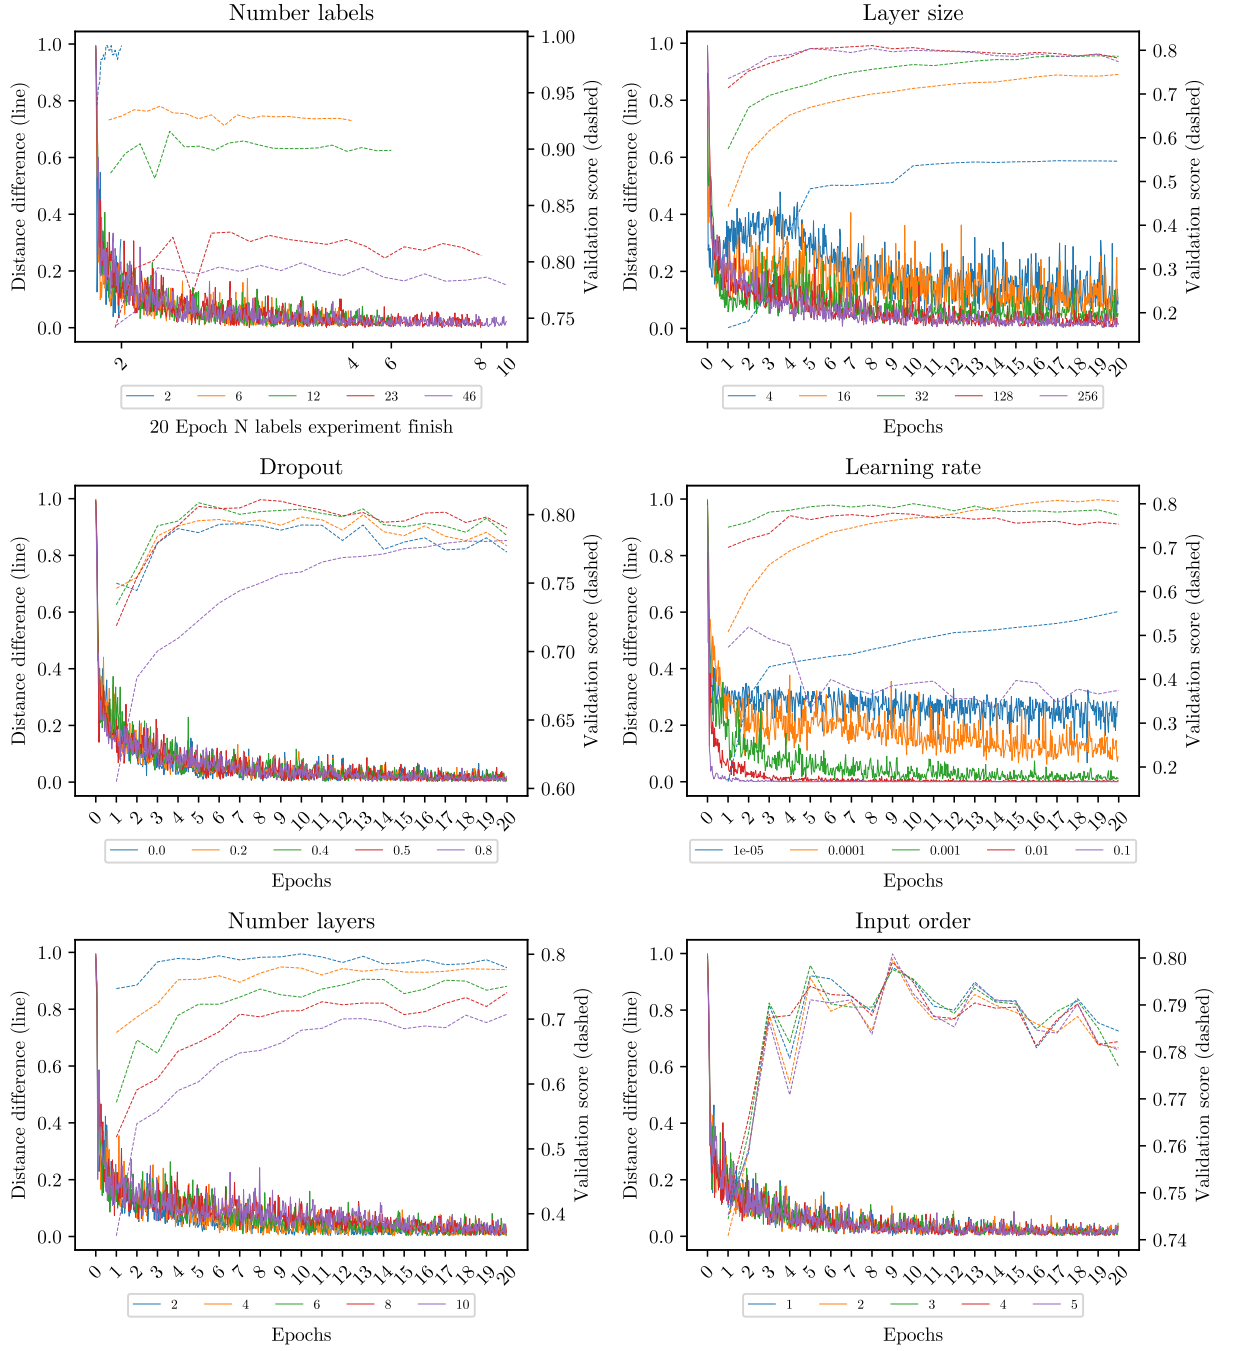

Figure 32: Reuters non-cumulative using Heat discretization.

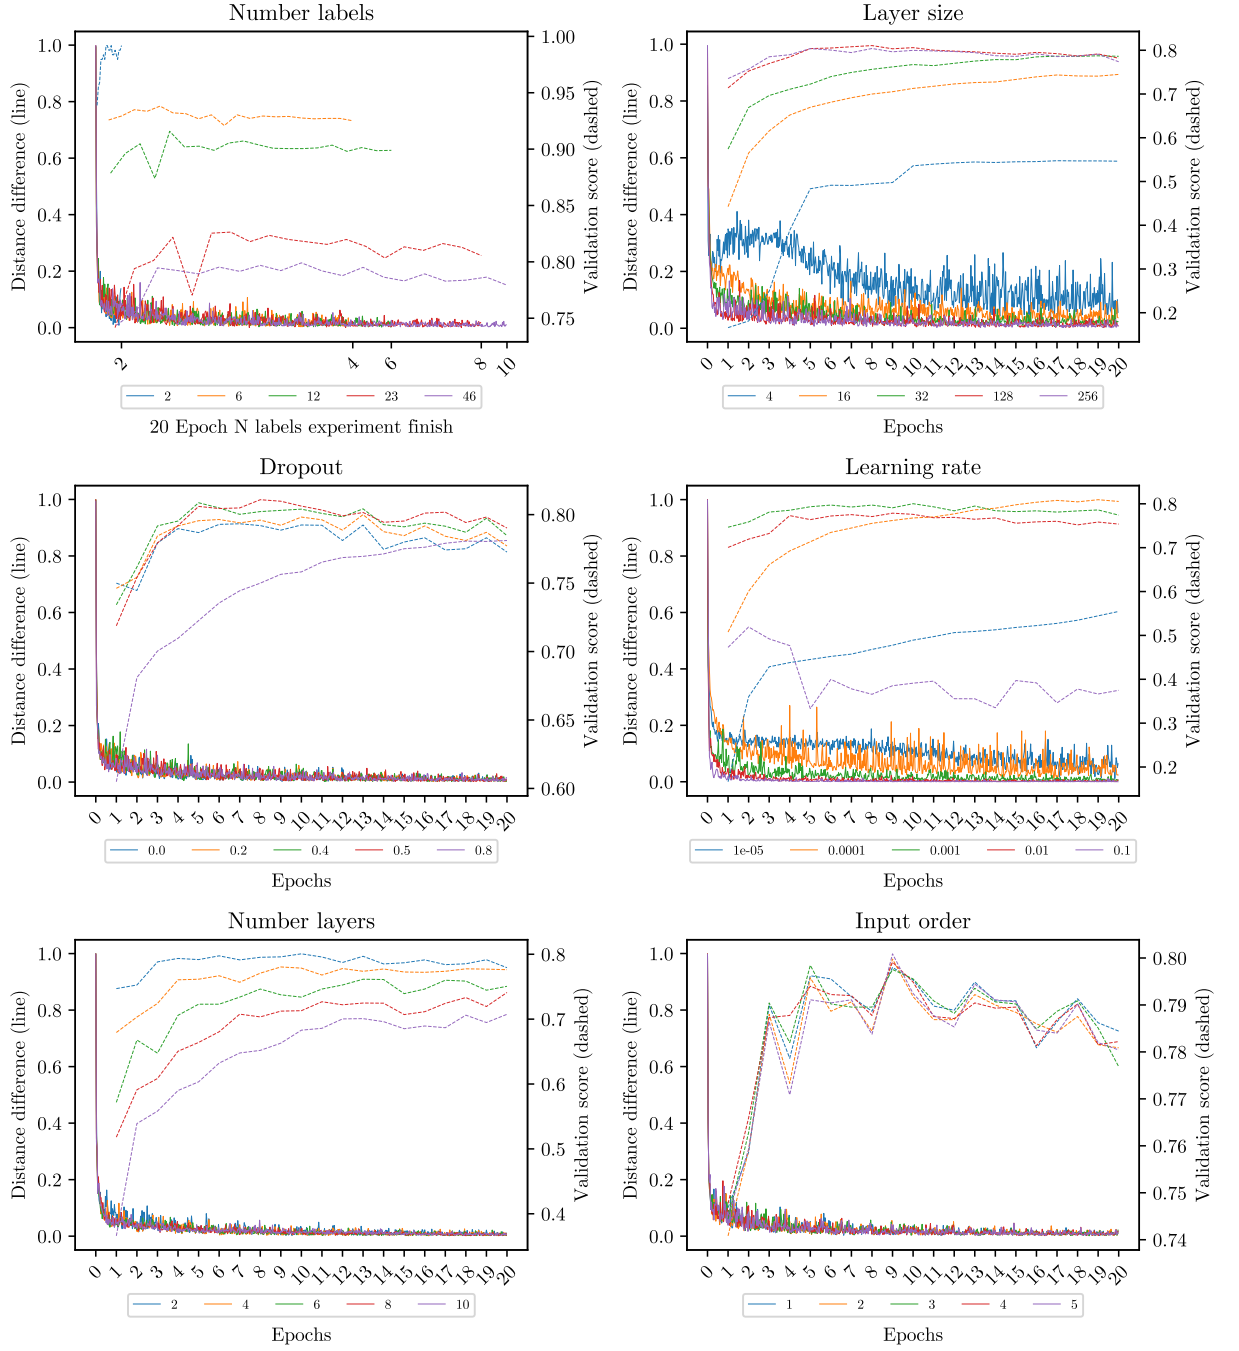

Figure 33: Reuters non-cumulative using Silhouette discretization.

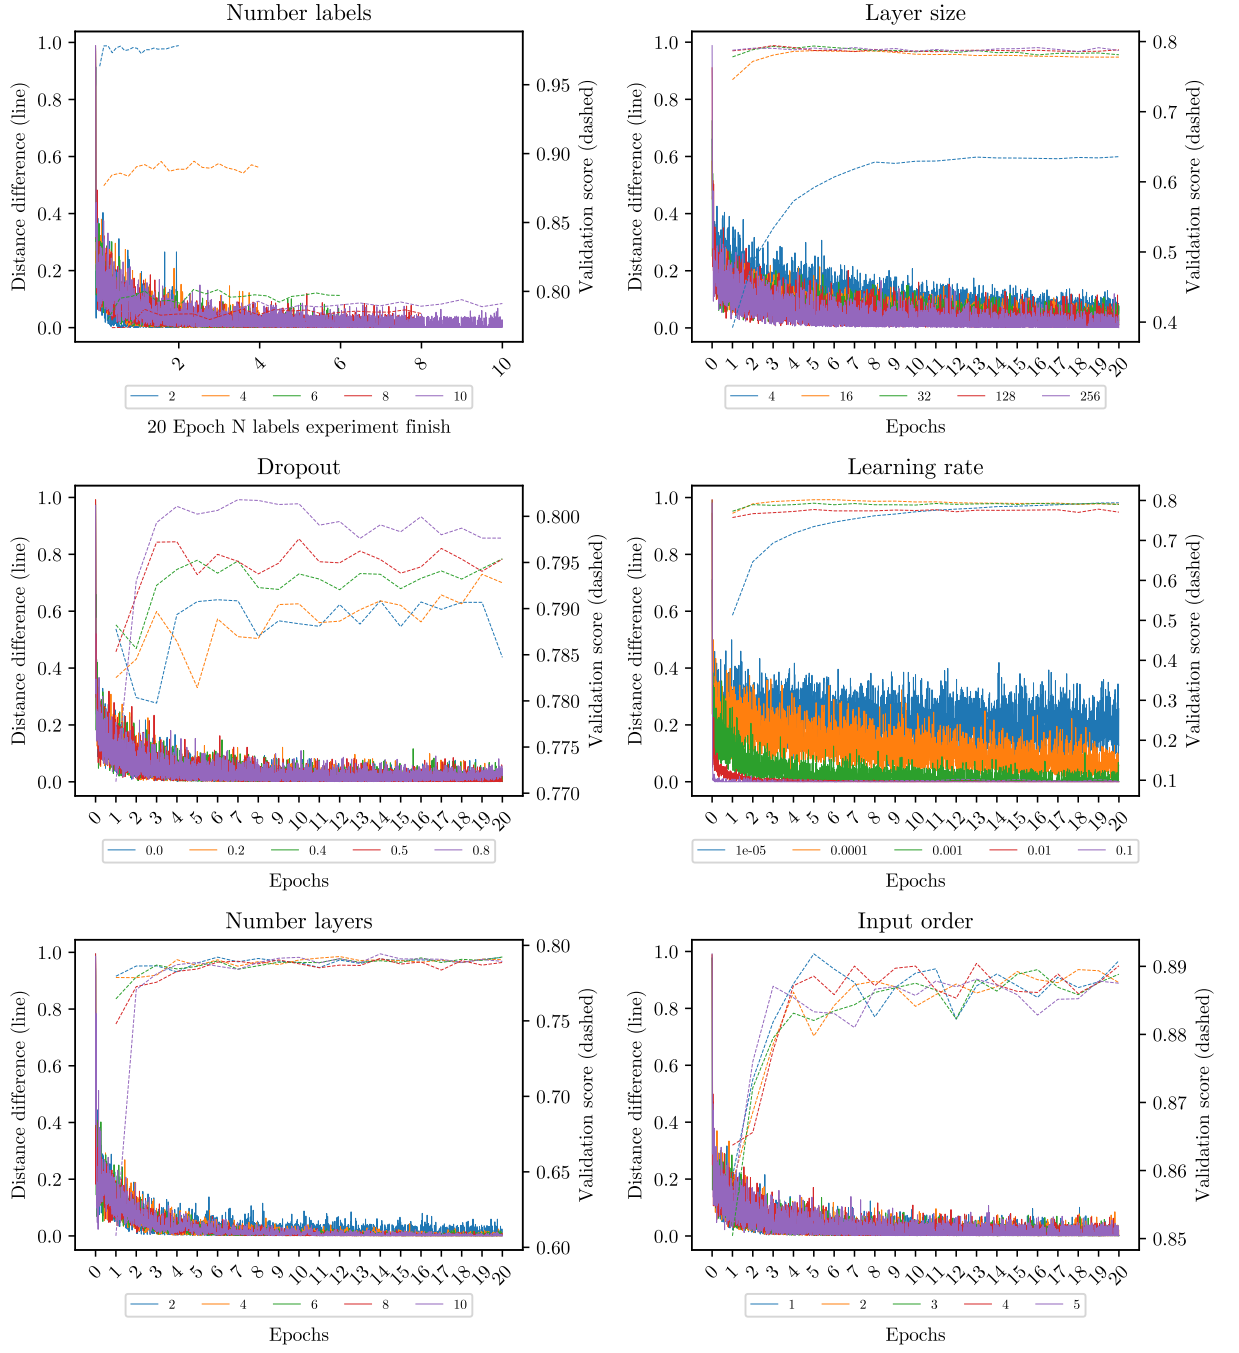

Figure 34: CIFAR-10 CNN non-cumulative using Heat discretization.

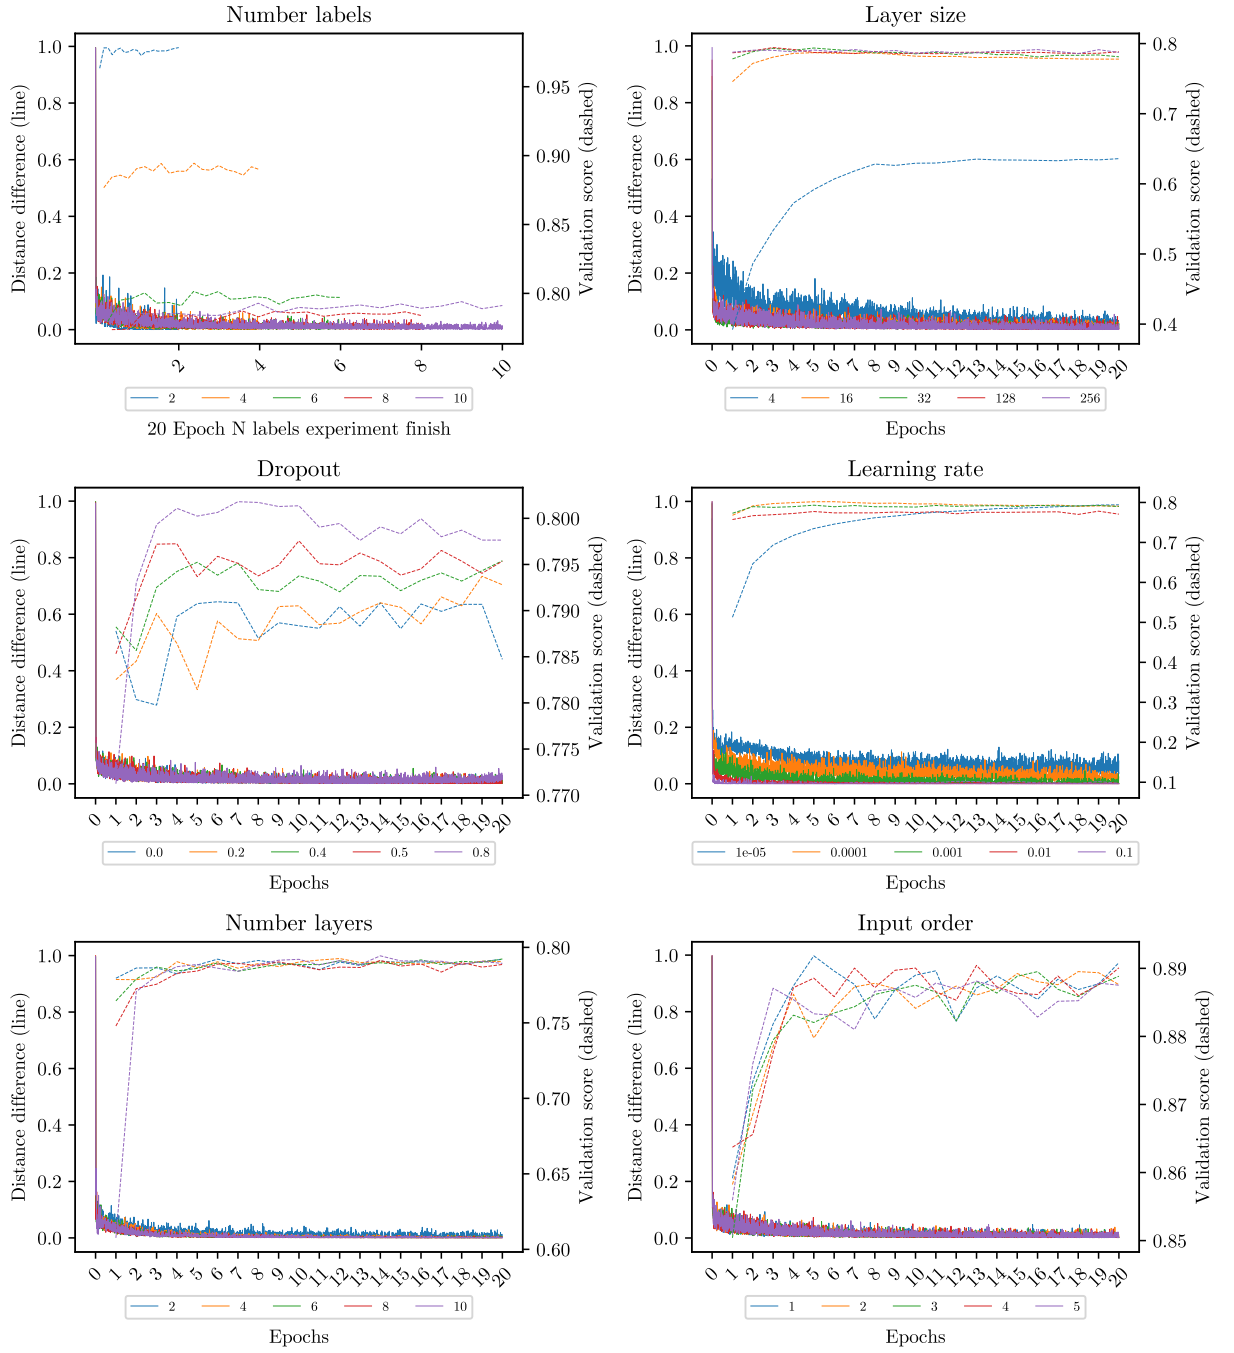

Figure 35: CIFAR-10 CNN non-cumulative using Silhouette discretization.

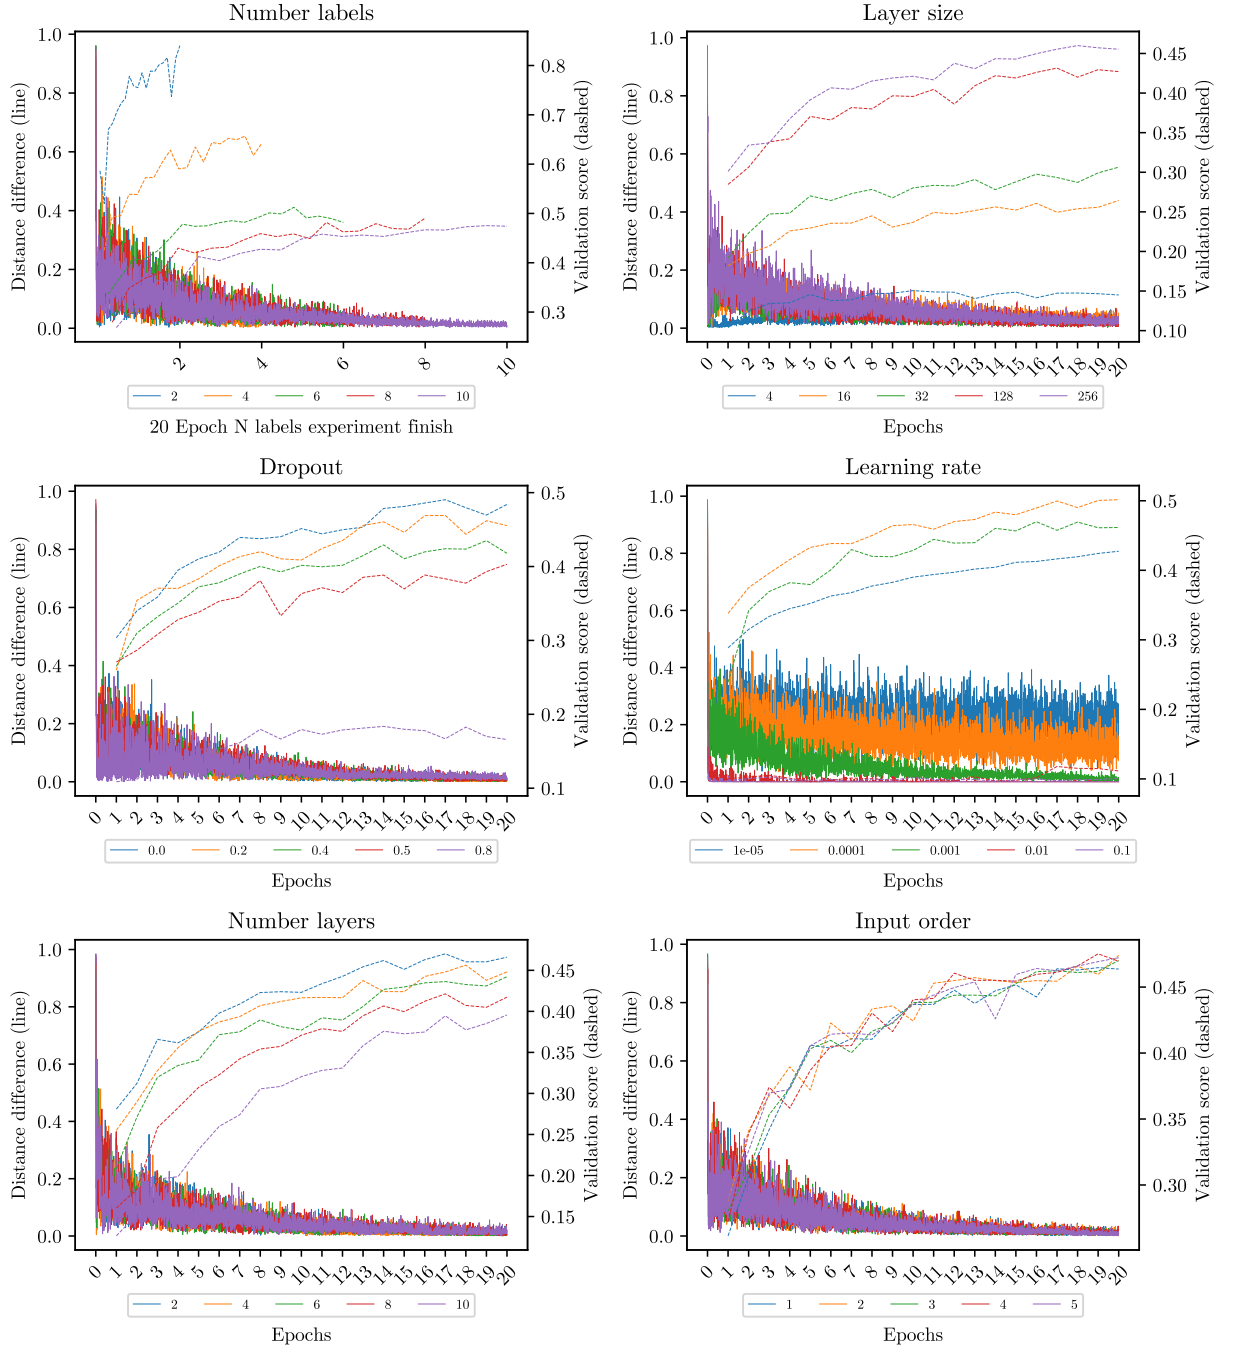

Figure 36: CIFAR-10 MLP non-cumulative using Heat discretization.



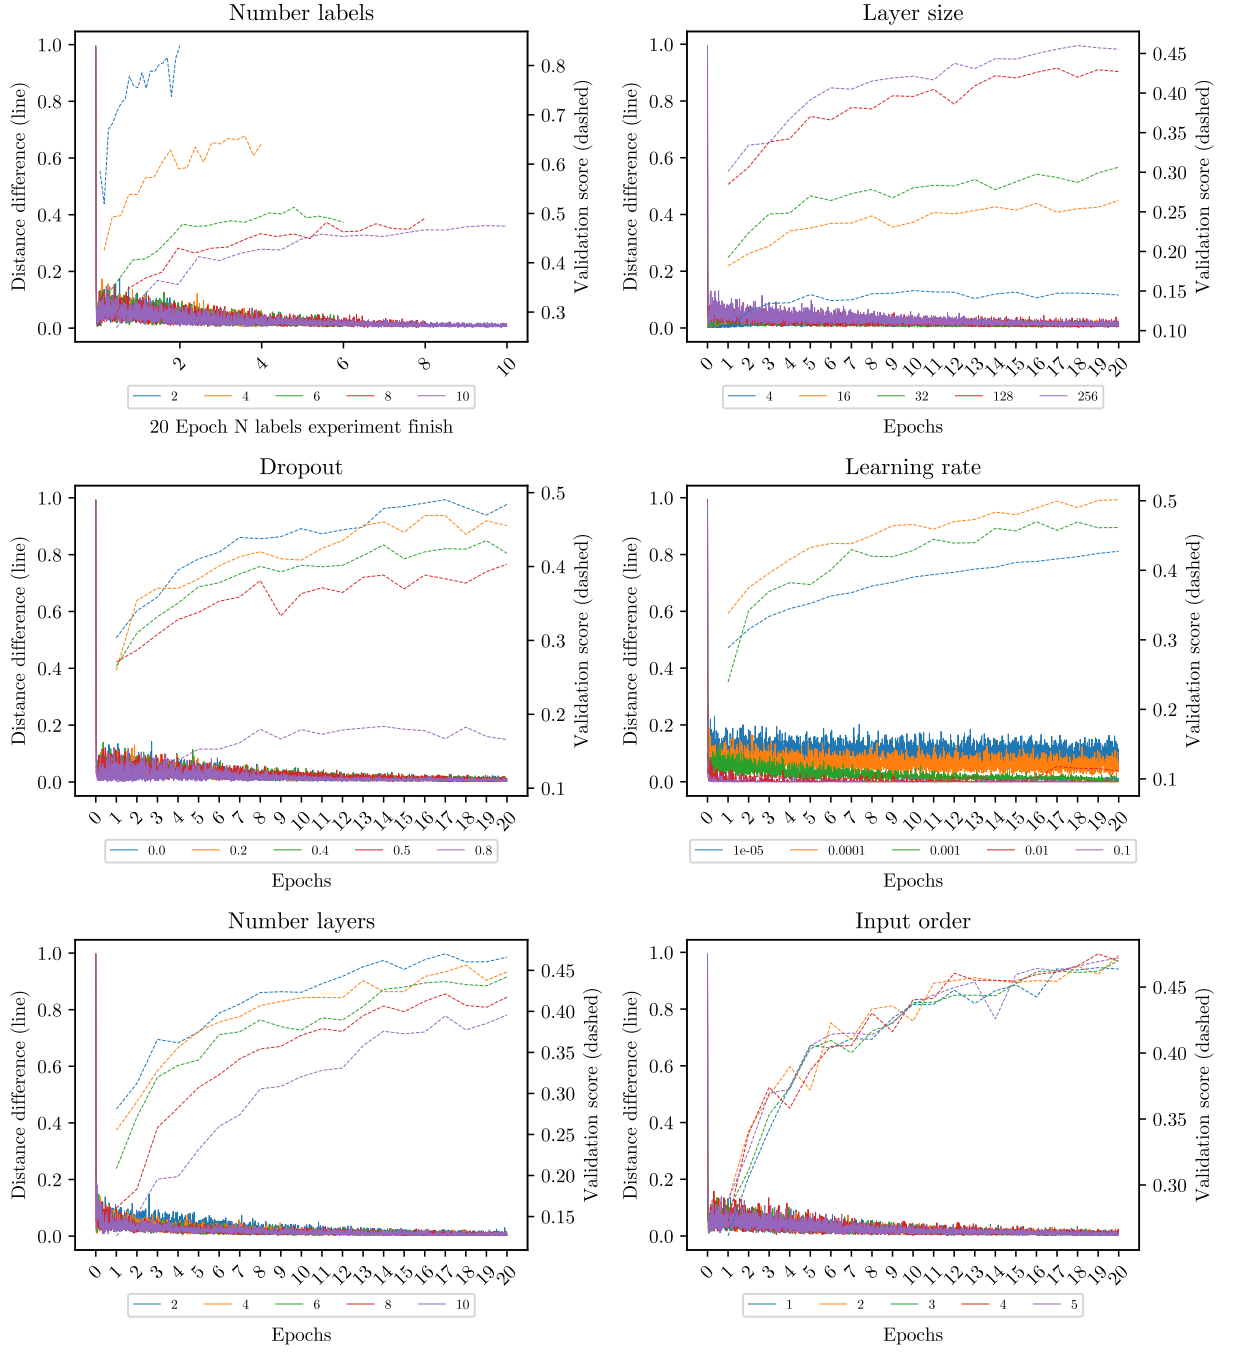

Figure 37: CIFAR-10 MLP non-cumulative using Silhouette discretization.

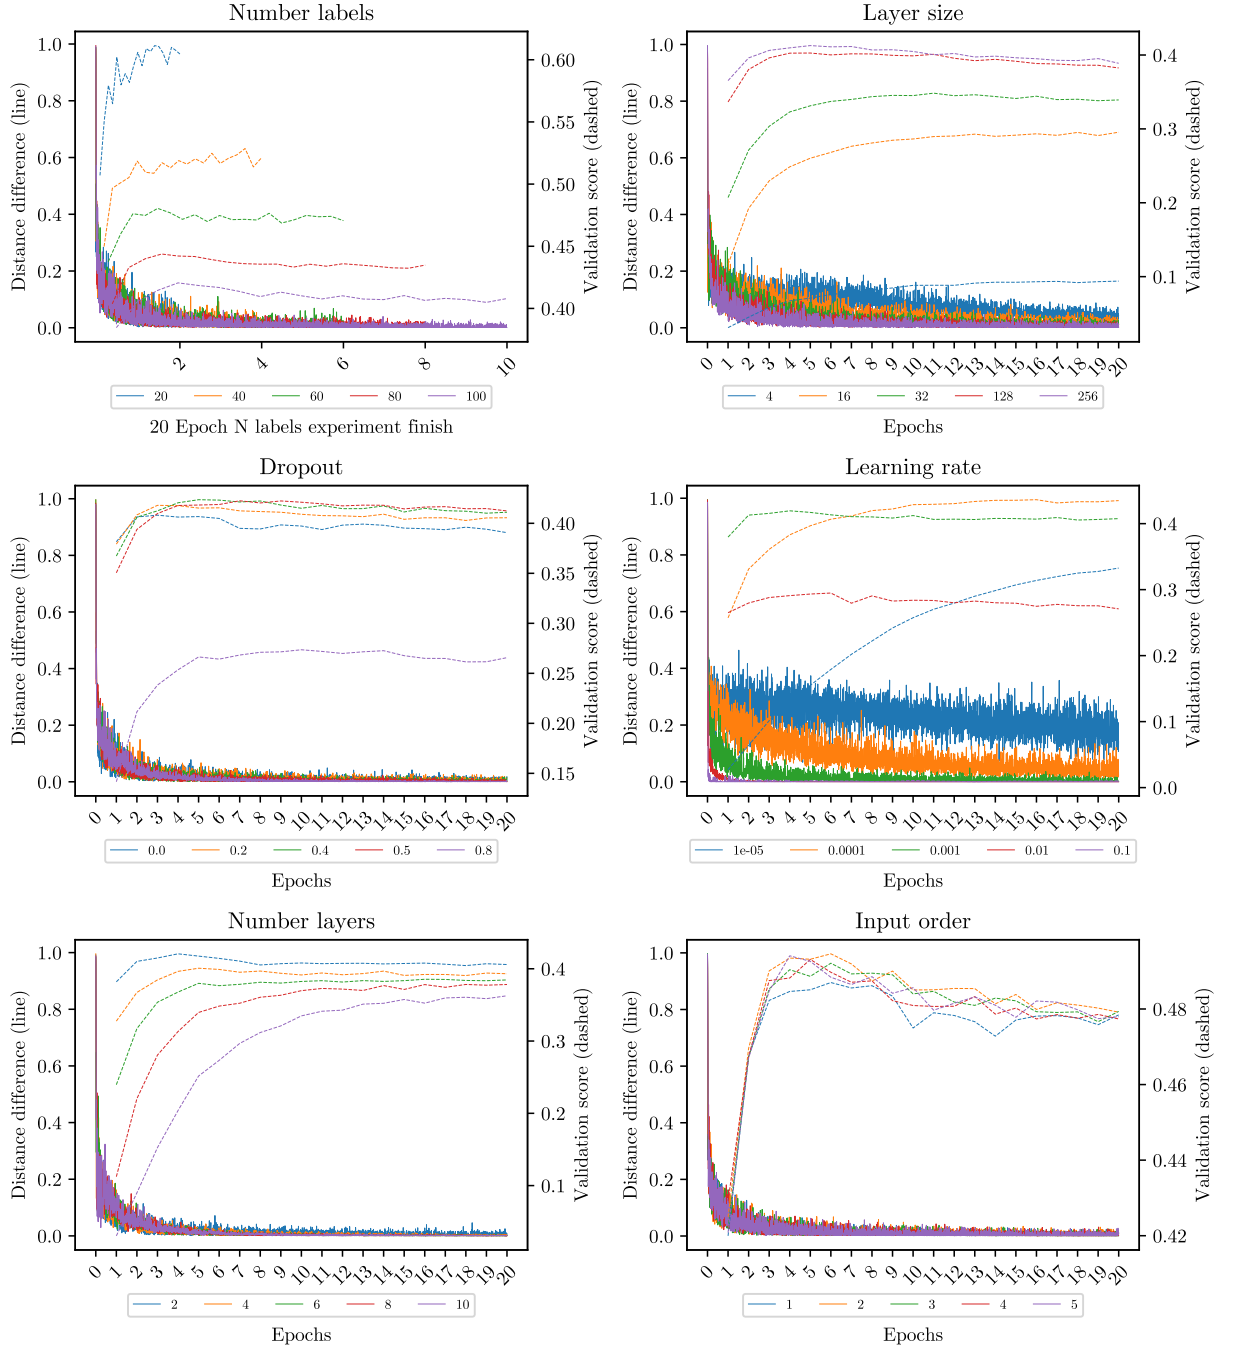

Figure 38: CIFAR-100 CNN non-cumulative using Heat discretization.

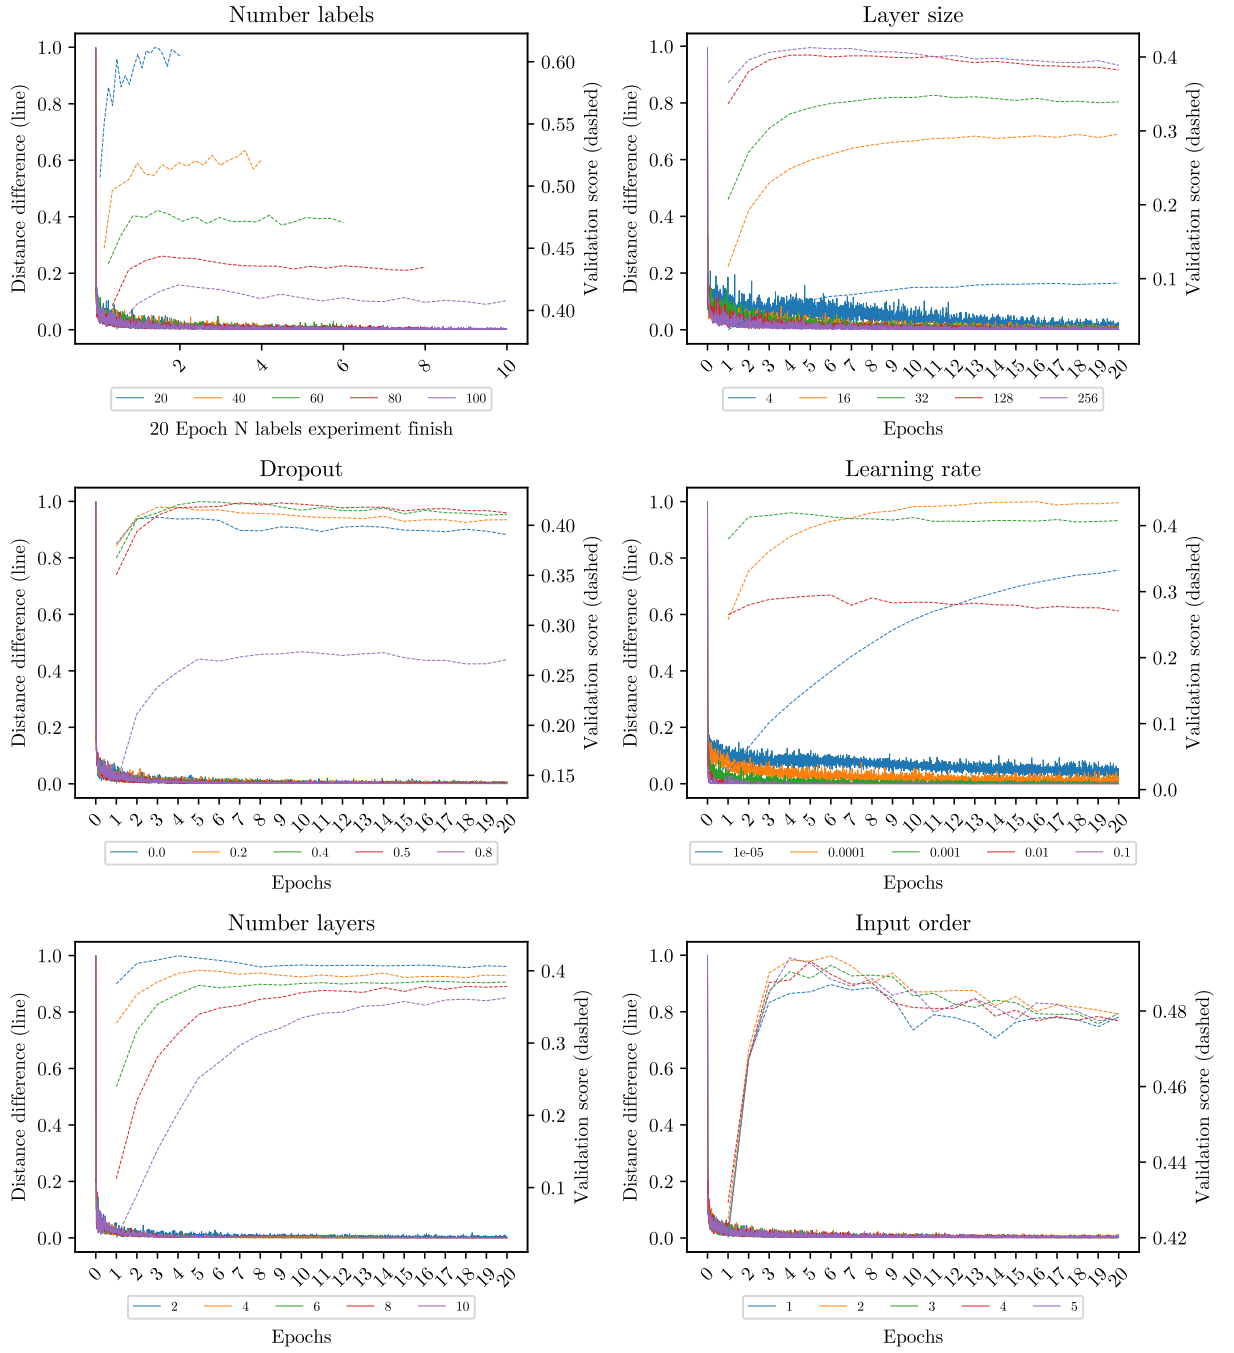

Figure 39: CIFAR-100 CNN non-cumulative using Silhouette discretization.

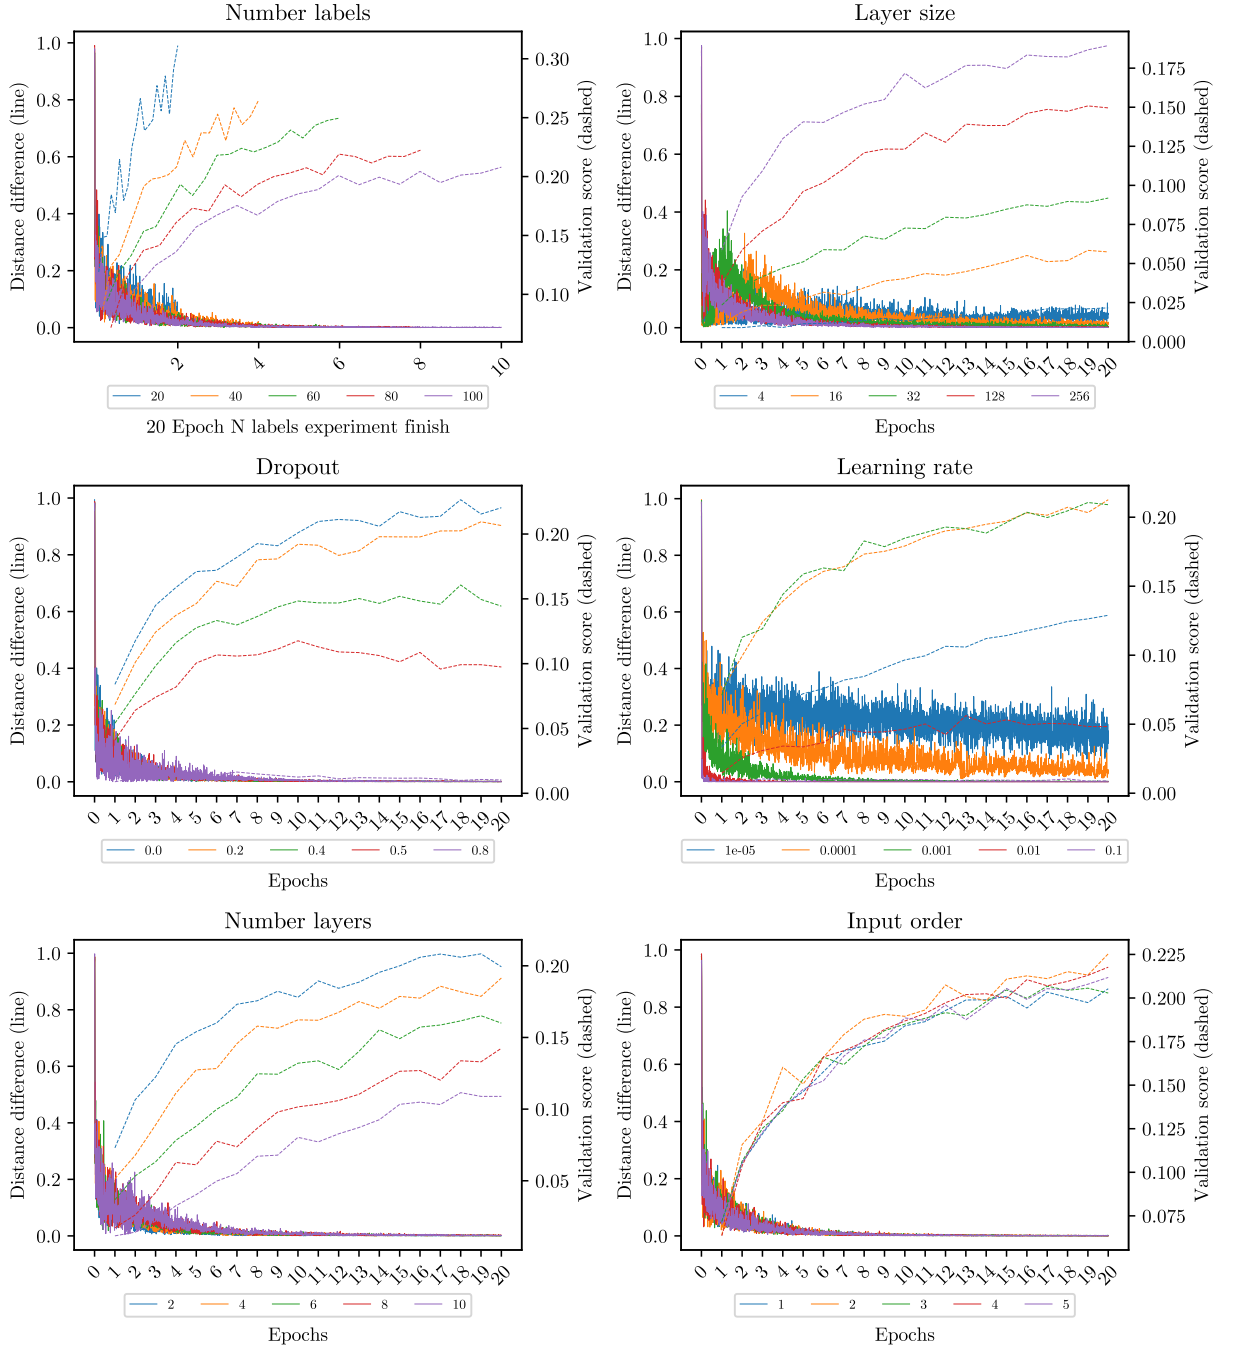

Figure 40: CIFAR-100 MLP non-cumulative using Heat discretization.

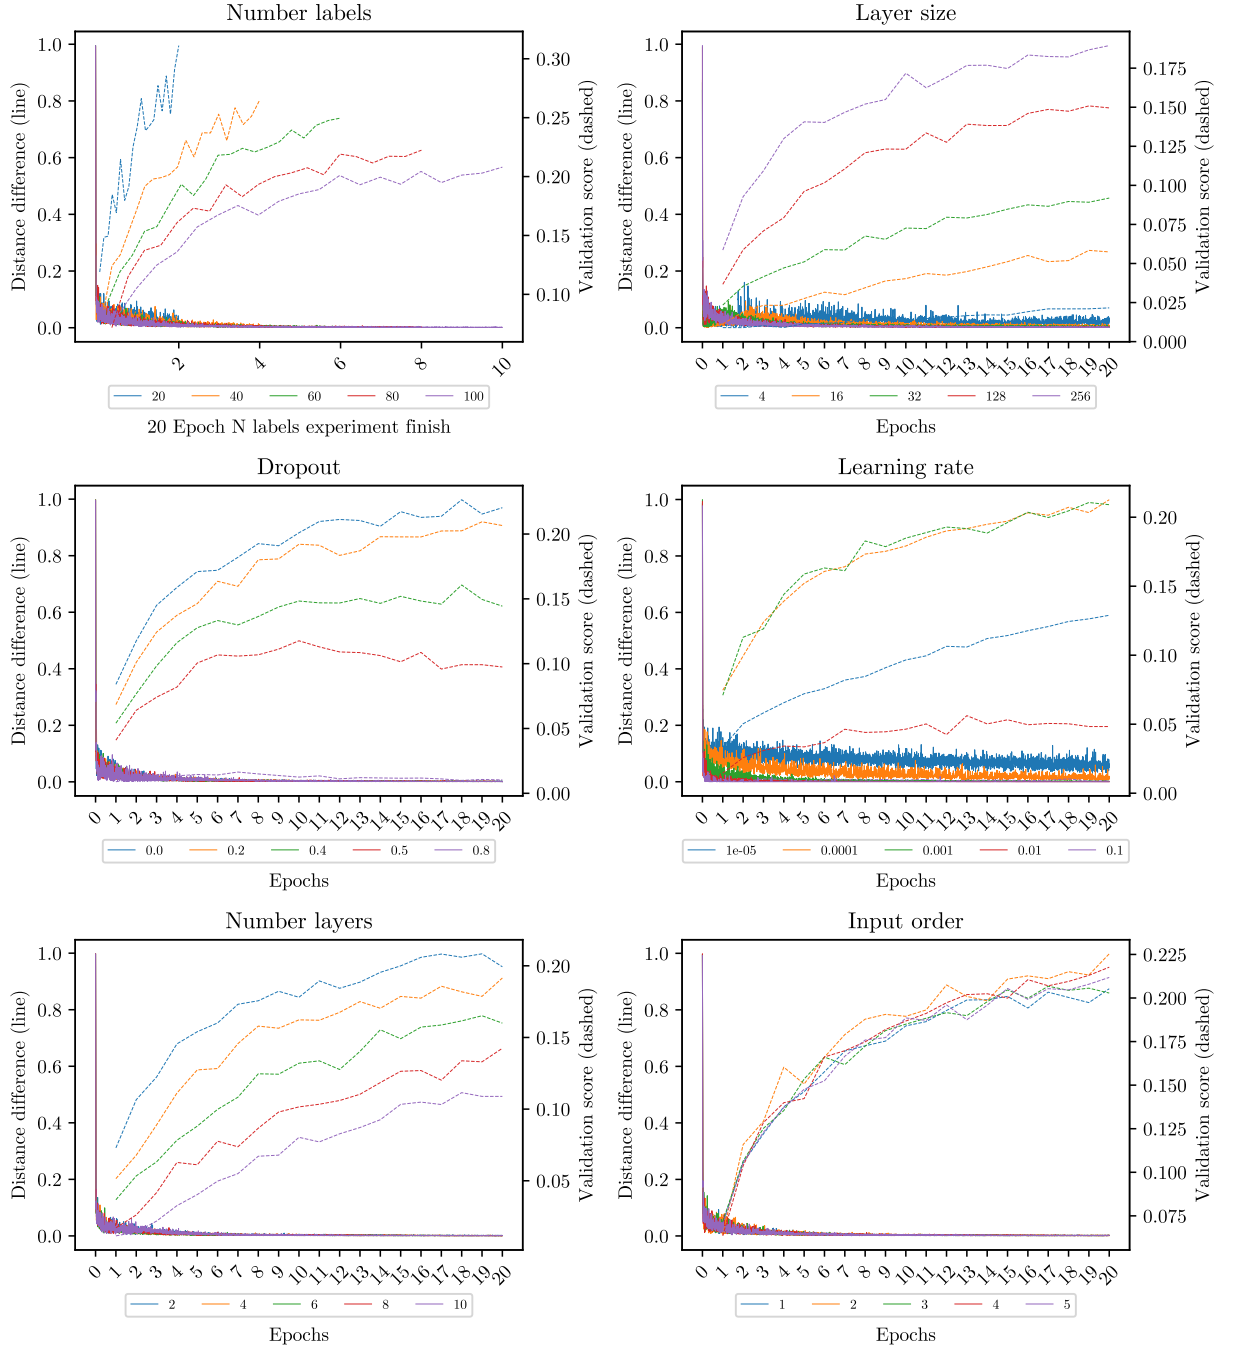

Figure 41: CIFAR-100 MLP non-cumulative using Silhouette discretization.

## CORRELATION TABLES

| Analysis type | Analysis Value | Pearson's r mean | Pearson's r standard deviation |
|---------------|----------------|------------------|--------------------------------|
| Layer size    | 4              | 0.8080           | 0.1270                         |
| Layer size    | 16             | 0.9120           | 0.0416                         |
| Layer size    | 32             | 0.9182           | 0.0327                         |
| Layer size    | 128            | 0.9224           | 0.0234                         |
| Layer size    | 256            | 0.9302           | 0.0328                         |
| Number labels | 2              | ERROR            | ERROR                          |
| Number labels | 4              | 0.6805           | 0.1218                         |
| Number labels | 6              | 0.8525           | 0.0394                         |
| Number labels | 8              | 0.8081           | 0.0835                         |
| Number labels | 10             | 0.9197           | 0.0235                         |
| Learning rate | 1e-05          | 0.8035           | 0.0158                         |
| Learning rate | 0.0001         | 0.9165           | 0.0136                         |
| Learning rate | 0.001          | 0.9106           | 0.0283                         |
| Learning rate | 0.01           | 0.8258           | 0.0615                         |
| Learning rate | 0.1            | 0.6516           | 0.2004                         |
| Dropout       | 0.0            | 0.8855           | 0.0251                         |
| Dropout       | 0.2            | 0.9399           | 0.0344                         |
| Dropout       | 0.4            | 0.9567           | 0.0097                         |
| Dropout       | 0.5            | 0.9487           | 0.0057                         |
| Dropout       | 0.8            | 0.9085           | 0.0494                         |
| Input order   | 1              | 0.9416           | 0.0212                         |
| Input order   | 2              | 0.9376           | 0.0233                         |
| Input order   | 3              | 0.9461           | 0.0290                         |
| Input order   | 4              | 0.9401           | 0.0190                         |
| Input order   | 5              | 0.9517           | 0.0124                         |
| Number layers | 2              | 0.9244           | 0.0307                         |
| Number layers | 4              | 0.8943           | 0.0431                         |
| Number layers | 6              | 0.9428           | 0.0131                         |
| Number layers | 8              | 0.9322           | 0.0360                         |
| Number layers | 10             | 0.9290           | 0.0313                         |

Table 1: MNIST Pearson's correlation using Heat distance.

| Analysis type | Analysis Value | Pearson's r mean | Pearson's r standard deviation |
|---------------|----------------|------------------|--------------------------------|
| Layer size    | 4              | 0.8232           | 0.1269                         |
| Layer size    | 16             | 0.8992           | 0.0428                         |
| Layer size    | 32             | 0.8976           | 0.0403                         |
| Layer size    | 128            | 0.8866           | 0.0246                         |
| Layer size    | 256            | 0.8882           | 0.0417                         |
| Number labels | 2              | ERROR            | ERROR                          |
| Number labels | 4              | 0.6691           | 0.1120                         |
| Number labels | 6              | 0.8039           | 0.0325                         |
| Number labels | 8              | 0.7982           | 0.0716                         |
| Number labels | 10             | 0.8668           | 0.0179                         |
| Learning rate | 1e-05          | 0.8542           | 0.0125                         |
| Learning rate | 0.0001         | 0.9309           | 0.0117                         |
| Learning rate | 0.001          | 0.8701           | 0.0496                         |
| Learning rate | 0.01           | 0.8666           | 0.0283                         |
| Learning rate | 0.1            | 0.6576           | 0.2068                         |
| Dropout       | 0.0            | 0.8172           | 0.0247                         |
| Dropout       | 0.2            | 0.9073           | 0.0483                         |
| Dropout       | 0.4            | 0.9274           | 0.0160                         |
| Dropout       | 0.5            | 0.9237           | 0.0148                         |
| Dropout       | 0.8            | 0.8574           | 0.0575                         |
| Input order   | 1              | 0.9039           | 0.0268                         |
| Input order   | 2              | 0.9000           | 0.0320                         |
| Input order   | 3              | 0.9018           | 0.0492                         |
| Input order   | 4              | 0.8907           | 0.0262                         |
| Input order   | 5              | 0.9159           | 0.0209                         |
| Number layers | 2              | 0.8903           | 0.0445                         |
| Number layers | 4              | 0.8872           | 0.0303                         |
| Number layers | 6              | 0.9236           | 0.0169                         |
| Number layers | 8              | 0.9384           | 0.0318                         |
| Number layers | 10             | 0.9057           | 0.0348                         |

Table 2: MNIST Pearson's correlation using Silhouette distance.

| Analysis type | Analysis Value | Pearson's r mean | Pearson's r standard deviation |
|---------------|----------------|------------------|--------------------------------|
| Layer size    | 4              | 0.8322           | 0.0319                         |
| Layer size    | 16             | 0.8581           | 0.0788                         |
| Layer size    | 32             | 0.9122           | 0.0252                         |
| Layer size    | 128            | 0.6472           | 0.0350                         |
| Layer size    | 256            | 0.5612           | 0.0534                         |
| Number labels | 2              | 0.7383           | 0.0774                         |
| Number labels | 6              | -0.2842          | 0.2590                         |
| Number labels | 12             | 0.3378           | 0.0808                         |
| Number labels | 23             | 0.5743           | 0.0610                         |
| Number labels | 46             | 0.5203           | 0.0883                         |
| Learning rate | 1e-05          | 0.7949           | 0.1165                         |
| Learning rate | 0.0001         | 0.8973           | 0.0077                         |
| Learning rate | 0.001          | 0.5292           | 0.1114                         |
| Learning rate | 0.01           | 0.7052           | 0.0696                         |
| Learning rate | 0.1            | -0.4898          | 0.1535                         |
| Dropout       | 0.0            | 0.4508           | 0.0532                         |
| Dropout       | 0.2            | 0.5700           | 0.0740                         |
| Dropout       | 0.4            | 0.6080           | 0.0378                         |
| Dropout       | 0.5            | 0.7262           | 0.0242                         |
| Dropout       | 0.8            | 0.9752           | 0.0076                         |
| Input order   | 1              | 0.6251           | 0.1389                         |
| Input order   | 2              | 0.6323           | 0.0630                         |
| Input order   | 3              | 0.6109           | 0.1181                         |
| Input order   | 4              | 0.5771           | 0.1141                         |
| Input order   | 5              | 0.6703           | 0.0275                         |
| Number layers | 2              | 0.5752           | 0.0677                         |
| Number layers | 4              | 0.8567           | 0.0320                         |
| Number layers | 6              | 0.8669           | 0.0235                         |
| Number layers | 8              | 0.8962           | 0.0155                         |
| Number layers | 10             | 0.8843           | 0.0548                         |

Table 3: REUTERS Pearson's correlation using Heat distance.



| Analysis type | Analysis Value | Pearson's r mean | Pearson's r standard deviation |
|---------------|----------------|------------------|--------------------------------|
| Layer size    | 4              | 0.8443           | 0.0372                         |
| Layer size    | 16             | 0.9011           | 0.0668                         |
| Layer size    | 32             | 0.9353           | 0.0222                         |
| Layer size    | 128            | 0.5695           | 0.0463                         |
| Layer size    | 256            | 0.4760           | 0.0581                         |
| Number labels | 2              | 0.7434           | 0.0785                         |
| Number labels | 6              | -0.3016          | 0.2553                         |
| Number labels | 12             | 0.3083           | 0.0873                         |
| Number labels | 23             | 0.5370           | 0.0666                         |
| Number labels | 46             | 0.4552           | 0.0830                         |
| Learning rate | 1e-05          | 0.8071           | 0.1153                         |
| Learning rate | 0.0001         | 0.9187           | 0.0073                         |
| Learning rate | 0.001          | 0.4635           | 0.1232                         |
| Learning rate | 0.01           | 0.6082           | 0.0751                         |
| Learning rate | 0.1            | -0.5837          | 0.1366                         |
| Dropout       | 0.0            | 0.3854           | 0.0561                         |
| Dropout       | 0.2            | 0.5108           | 0.0767                         |
| Dropout       | 0.4            | 0.5380           | 0.0508                         |
| Dropout       | 0.5            | 0.6617           | 0.0143                         |
| Dropout       | 0.8            | 0.9554           | 0.0112                         |
| Input order   | 1              | 0.5739           | 0.1468                         |
| Input order   | 2              | 0.5711           | 0.0738                         |
| Input order   | 3              | 0.5591           | 0.1282                         |
| Input order   | 4              | 0.5220           | 0.1145                         |
| Input order   | 5              | 0.6216           | 0.0352                         |
| Number layers | 2              | 0.5207           | 0.0712                         |
| Number layers | 4              | 0.8503           | 0.0348                         |
| Number layers | 6              | 0.8823           | 0.0234                         |
| Number layers | 8              | 0.9220           | 0.0110                         |
| Number layers | 10             | 0.9068           | 0.0409                         |

Table 4: REUTERS Pearson's correlation using Silhouette distance.

| Analysis type | Analysis Value | Pearson's r mean | Pearson's r standard deviation |
|---------------|----------------|------------------|--------------------------------|
| Layer size    | 4              | 0.8066           | 0.0480                         |
| Layer size    | 16             | 0.2882           | 0.3050                         |
| Layer size    | 32             | -0.3713          | 0.2989                         |
| Layer size    | 128            | -0.2872          | 0.1714                         |
| Layer size    | 256            | -0.1035          | 0.2905                         |
| Number labels | 2              | 0.2517           | 0.2946                         |
| Number labels | 4              | 0.3307           | 0.3197                         |
| Number labels | 6              | 0.2712           | 0.3099                         |
| Number labels | 8              | 0.5009           | 0.2813                         |
| Number labels | 10             | 0.3501           | 0.1339                         |
| Learning rate | 1e-05          | 0.7876           | 0.0099                         |
| Learning rate | 0.0001         | 0.1131           | 0.0572                         |
| Learning rate | 0.001          | 0.5346           | 0.2875                         |
| Learning rate | 0.01           | 0.4672           | 0.1593                         |
| Learning rate | 0.1            | -0.1287          | 0.3295                         |
| Dropout       | 0.0            | 0.2901           | 0.2357                         |
| Dropout       | 0.2            | 0.5089           | 0.2655                         |
| Dropout       | 0.4            | 0.3915           | 0.2252                         |
| Dropout       | 0.5            | 0.3815           | 0.2564                         |
| Dropout       | 0.8            | 0.5608           | 0.1693                         |
| Input order   | 1              | 0.6134           | 0.1403                         |
| Input order   | 2              | 0.7551           | 0.1070                         |
| Input order   | 3              | 0.7949           | 0.0424                         |
| Input order   | 4              | 0.7134           | 0.1470                         |
| Input order   | 5              | 0.6552           | 0.1582                         |
| Number layers | 2              | 0.3803           | 0.2913                         |
| Number layers | 4              | 0.5976           | 0.0911                         |
| Number layers | 6              | 0.6576           | 0.1912                         |
| Number layers | 8              | 0.8081           | 0.0917                         |
| Number layers | 10             | 0.8050           | 0.0364                         |

Table 5: CIFAR10CNN Pearson's correlation using Heat distance.

| Analysis type | Analysis Value | Pearson's r mean | Pearson's r standard deviation |
|---------------|----------------|------------------|--------------------------------|
| Layer size    | 4              | 0.8365           | 0.0410                         |
| Layer size    | 16             | 0.2859           | 0.3022                         |
| Layer size    | 32             | -0.3900          | 0.2913                         |
| Layer size    | 128            | -0.2940          | 0.1659                         |
| Layer size    | 256            | -0.1073          | 0.2823                         |
| Number labels | 2              | 0.2326           | 0.2877                         |
| Number labels | 4              | 0.2942           | 0.3251                         |
| Number labels | 6              | 0.2448           | 0.2918                         |
| Number labels | 8              | 0.4721           | 0.2600                         |
| Number labels | 10             | 0.3736           | 0.0926                         |
| Learning rate | 1e-05          | 0.8300           | 0.0094                         |
| Learning rate | 0.0001         | 0.1090           | 0.0606                         |
| Learning rate | 0.001          | 0.4838           | 0.2909                         |
| Learning rate | 0.01           | 0.4343           | 0.1867                         |
| Learning rate | 0.1            | -0.1287          | 0.3343                         |
| Dropout       | 0.0            | 0.2839           | 0.2095                         |
| Dropout       | 0.2            | 0.5217           | 0.2303                         |
| Dropout       | 0.4            | 0.3686           | 0.2129                         |
| Dropout       | 0.5            | 0.3344           | 0.2336                         |
| Dropout       | 0.8            | 0.4527           | 0.1747                         |
| Input order   | 1              | 0.5628           | 0.1471                         |
| Input order   | 2              | 0.7108           | 0.1276                         |
| Input order   | 3              | 0.7470           | 0.0569                         |
| Input order   | 4              | 0.6606           | 0.1529                         |
| Input order   | 5              | 0.5970           | 0.1521                         |
| Number layers | 2              | 0.3759           | 0.2634                         |
| Number layers | 4              | 0.5952           | 0.0978                         |
| Number layers | 6              | 0.6525           | 0.1865                         |
| Number layers | 8              | 0.7839           | 0.0942                         |
| Number layers | 10             | 0.7738           | 0.0317                         |

Table 6: CIFAR10CNN Pearson's correlation using Silhouette distance.

| Analysis type | Analysis Value | Pearson's r mean | Pearson's r standard deviation |
|---------------|----------------|------------------|--------------------------------|
| Layer size    | 4              | 0.2950           | 0.3612                         |
| Layer size    | 16             | 0.7703           | 0.2399                         |
| Layer size    | 32             | 0.8268           | 0.1422                         |
| Layer size    | 128            | 0.9307           | 0.0079                         |
| Layer size    | 256            | 0.9245           | 0.0157                         |
| Number labels | 2              | 0.7327           | 0.0660                         |
| Number labels | 4              | 0.8480           | 0.0572                         |
| Number labels | 6              | 0.8443           | 0.0502                         |
| Number labels | 8              | 0.8792           | 0.0411                         |
| Number labels | 10             | 0.9536           | 0.0217                         |
| Learning rate | 1e-05          | 0.9596           | 0.0051                         |
| Learning rate | 0.0001         | 0.9317           | 0.0198                         |
| Learning rate | 0.001          | 0.9270           | 0.0250                         |
| Learning rate | 0.01           | -0.0373          | 0.2588                         |
| Learning rate | 0.1            | 0.0838           | 0.2118                         |
| Dropout       | 0.0            | 0.9411           | 0.0264                         |
| Dropout       | 0.2            | 0.9144           | 0.0229                         |
| Dropout       | 0.4            | 0.9365           | 0.0154                         |
| Dropout       | 0.5            | 0.8564           | 0.0743                         |
| Dropout       | 0.8            | 0.7389           | 0.0910                         |
| Input order   | 1              | 0.9468           | 0.0101                         |
| Input order   | 2              | 0.9232           | 0.0301                         |
| Input order   | 3              | 0.9482           | 0.0099                         |
| Input order   | 4              | 0.9168           | 0.0415                         |
| Input order   | 5              | 0.9327           | 0.0282                         |
| Number layers | 2              | 0.9425           | 0.0178                         |
| Number layers | 4              | 0.9511           | 0.0151                         |
| Number layers | 6              | 0.9466           | 0.0150                         |
| Number layers | 8              | 0.9613           | 0.0139                         |
| Number layers | 10             | 0.9741           | 0.0119                         |

Table 7: CIFAR10MLP Pearson's correlation using Heat distance.

| Analysis type | Analysis Value | Pearson's r mean | Pearson's r standard deviation |
|---------------|----------------|------------------|--------------------------------|
| Layer size    | 4              | 0.3302           | 0.3375                         |
| Layer size    | 16             | 0.7520           | 0.2474                         |
| Layer size    | 32             | 0.8016           | 0.1655                         |
| Layer size    | 128            | 0.9163           | 0.0208                         |
| Layer size    | 256            | 0.9124           | 0.0205                         |
| Number labels | 2              | 0.7272           | 0.0622                         |
| Number labels | 4              | 0.8307           | 0.0630                         |
| Number labels | 6              | 0.8269           | 0.0517                         |
| Number labels | 8              | 0.8627           | 0.0425                         |
| Number labels | 10             | 0.9403           | 0.0262                         |
| Learning rate | 1e-05          | 0.9611           | 0.0041                         |
| Learning rate | 0.0001         | 0.9235           | 0.0213                         |
| Learning rate | 0.001          | 0.9088           | 0.0284                         |
| Learning rate | 0.01           | -0.0310          | 0.2815                         |
| Learning rate | 0.1            | 0.0566           | 0.2259                         |
| Dropout       | 0.0            | 0.9342           | 0.0274                         |
| Dropout       | 0.2            | 0.9082           | 0.0165                         |
| Dropout       | 0.4            | 0.9213           | 0.0247                         |
| Dropout       | 0.5            | 0.8486           | 0.0679                         |
| Dropout       | 0.8            | 0.7399           | 0.0910                         |
| Input order   | 1              | 0.9312           | 0.0117                         |
| Input order   | 2              | 0.9080           | 0.0294                         |
| Input order   | 3              | 0.9395           | 0.0071                         |
| Input order   | 4              | 0.9077           | 0.0343                         |
| Input order   | 5              | 0.9267           | 0.0272                         |
| Number layers | 2              | 0.9351           | 0.0172                         |
| Number layers | 4              | 0.9427           | 0.0178                         |
| Number layers | 6              | 0.9419           | 0.0147                         |
| Number layers | 8              | 0.9593           | 0.0135                         |
| Number layers | 10             | 0.9788           | 0.0069                         |

Table 8: CIFAR10MLP Pearson's correlation using Silhouette distance.

| Analysis type | Analysis Value | Pearson's r mean | Pearson's r standard deviation |
|---------------|----------------|------------------|--------------------------------|
| Layer size    | 4              | 0.8908           | 0.0707                         |
| Layer size    | 16             | 0.8926           | 0.0230                         |
| Layer size    | 32             | 0.8653           | 0.0332                         |
| Layer size    | 128            | 0.5020           | 0.1325                         |
| Layer size    | 256            | 0.2174           | 0.1214                         |
| Number labels | 20             | 0.7607           | 0.0742                         |
| Number labels | 40             | 0.7704           | 0.0761                         |
| Number labels | 60             | 0.5372           | 0.2043                         |
| Number labels | 80             | 0.4041           | 0.1317                         |
| Number labels | 100            | 0.3615           | 0.1028                         |
| Learning rate | 1e-05          | 0.9694           | 0.0067                         |
| Learning rate | 0.0001         | 0.8980           | 0.0166                         |
| Learning rate | 0.001          | 0.3175           | 0.0993                         |
| Learning rate | 0.01           | 0.3461           | 0.2098                         |
| Learning rate | 0.1            | -0.1318          | 0.1987                         |
| Dropout       | 0.0            | -0.0528          | 0.1971                         |
| Dropout       | 0.2            | 0.3034           | 0.0576                         |
| Dropout       | 0.4            | 0.6674           | 0.0835                         |
| Dropout       | 0.5            | 0.8462           | 0.0514                         |
| Dropout       | 0.8            | 0.9509           | 0.0168                         |
| Input order   | 1              | 0.6445           | 0.0834                         |
| Input order   | 2              | 0.5699           | 0.0830                         |
| Input order   | 3              | 0.6100           | 0.0477                         |
| Input order   | 4              | 0.5651           | 0.0729                         |
| Input order   | 5              | 0.6246           | 0.0409                         |
| Number layers | 2              | 0.2756           | 0.1057                         |
| Number layers | 4              | 0.8624           | 0.0419                         |
| Number layers | 6              | 0.9706           | 0.0089                         |
| Number layers | 8              | 0.9931           | 0.0020                         |
| Number layers | 10             | 0.9572           | 0.0063                         |

Table 9: CIFAR100CNN Pearson's correlation using Heat distance.

| Analysis type | Analysis Value | Pearson's r mean | Pearson's r standard deviation |
|---------------|----------------|------------------|--------------------------------|
| Layer size    | 4              | 0.9129           | 0.0642                         |
| Layer size    | 16             | 0.8940           | 0.0274                         |
| Layer size    | 32             | 0.8530           | 0.0325                         |
| Layer size    | 128            | 0.4209           | 0.1335                         |
| Layer size    | 256            | 0.1129           | 0.1202                         |
| Number labels | 20             | 0.7450           | 0.0777                         |
| Number labels | 40             | 0.7361           | 0.0734                         |
| Number labels | 60             | 0.4762           | 0.2142                         |
| Number labels | 80             | 0.3103           | 0.1319                         |
| Number labels | 100            | 0.2614           | 0.0929                         |
| Learning rate | 1e-05          | 0.9806           | 0.0052                         |
| Learning rate | 0.0001         | 0.9015           | 0.0188                         |
| Learning rate | 0.001          | 0.2212           | 0.1084                         |
| Learning rate | 0.01           | 0.2032           | 0.2316                         |
| Learning rate | 0.1            | -0.1386          | 0.2254                         |
| Dropout       | 0.0            | -0.1262          | 0.1812                         |
| Dropout       | 0.2            | 0.1994           | 0.0553                         |
| Dropout       | 0.4            | 0.5566           | 0.0944                         |
| Dropout       | 0.5            | 0.7549           | 0.0621                         |
| Dropout       | 0.8            | 0.8843           | 0.0347                         |
| Input order   | 1              | 0.5514           | 0.0865                         |
| Input order   | 2              | 0.4804           | 0.0842                         |
| Input order   | 3              | 0.5161           | 0.0472                         |
| Input order   | 4              | 0.4686           | 0.0772                         |
| Input order   | 5              | 0.5282           | 0.0374                         |
| Number layers | 2              | 0.1789           | 0.1113                         |
| Number layers | 4              | 0.8221           | 0.0507                         |
| Number layers | 6              | 0.9577           | 0.0124                         |
| Number layers | 8              | 0.9850           | 0.0032                         |
| Number layers | 10             | 0.9531           | 0.0066                         |

Table 10: CIFAR100CNN Pearson's correlation using Silhouette distance.

| Analysis type | Analysis Value | Pearson's r mean | Pearson's r standard deviation |
|---------------|----------------|------------------|--------------------------------|
| Layer size    | 4              | 0.5640           | 0.6287                         |
| Layer size    | 16             | 0.9096           | 0.0500                         |
| Layer size    | 32             | 0.9275           | 0.0152                         |
| Layer size    | 128            | 0.9253           | 0.0191                         |
| Layer size    | 256            | 0.9348           | 0.0208                         |
| Number labels | 20             | 0.8612           | 0.0283                         |
| Number labels | 40             | 0.9361           | 0.0188                         |
| Number labels | 60             | 0.9233           | 0.0178                         |
| Number labels | 80             | 0.9515           | 0.0120                         |
| Number labels | 100            | 0.9314           | 0.0204                         |
| Learning rate | 1e-05          | 0.9864           | 0.0056                         |
| Learning rate | 0.0001         | 0.9813           | 0.0046                         |
| Learning rate | 0.001          | 0.9385           | 0.0084                         |
| Learning rate | 0.01           | 0.7182           | 0.0230                         |
| Learning rate | 0.1            | -0.1033          | 0.1915                         |
| Dropout       | 0.0            | 0.9298           | 0.0307                         |
| Dropout       | 0.2            | 0.9274           | 0.0101                         |
| Dropout       | 0.4            | 0.9372           | 0.0133                         |
| Dropout       | 0.5            | 0.8675           | 0.0518                         |
| Dropout       | 0.8            | 0.0635           | 0.3428                         |
| Input order   | 1              | 0.9278           | 0.0135                         |
| Input order   | 2              | 0.9425           | 0.0066                         |
| Input order   | 3              | 0.9315           | 0.0251                         |
| Input order   | 4              | 0.9221           | 0.0259                         |
| Input order   | 5              | 0.9172           | 0.0133                         |
| Number layers | 2              | 0.9346           | 0.0112                         |
| Number layers | 4              | 0.9135           | 0.0315                         |
| Number layers | 6              | 0.8876           | 0.0143                         |
| Number layers | 8              | 0.8980           | 0.0140                         |
| Number layers | 10             | 0.8733           | 0.0297                         |

Table 11: CIFAR100MLP Pearson's correlation using Heat distance.



| Analysis type | Analysis Value | Pearson's r mean | Pearson's r standard deviation |
|---------------|----------------|------------------|--------------------------------|
| Layer size    | 4              | 0.5423           | 0.6368                         |
| Layer size    | 16             | 0.9261           | 0.0409                         |
| Layer size    | 32             | 0.9602           | 0.0092                         |
| Layer size    | 128            | 0.9689           | 0.0162                         |
| Layer size    | 256            | 0.9669           | 0.0103                         |
| Number labels | 20             | 0.8617           | 0.0284                         |
| Number labels | 40             | 0.9375           | 0.0194                         |
| Number labels | 60             | 0.9484           | 0.0095                         |
| Number labels | 80             | 0.9697           | 0.0048                         |
| Number labels | 100            | 0.9706           | 0.0076                         |
| Learning rate | 1e-05          | 0.9882           | 0.0053                         |
| Learning rate | 0.0001         | 0.9792           | 0.0047                         |
| Learning rate | 0.001          | 0.9754           | 0.0065                         |
| Learning rate | 0.01           | 0.7968           | 0.0622                         |
| Learning rate | 0.1            | -0.0751          | 0.2187                         |
| Dropout       | 0.0            | 0.9635           | 0.0155                         |
| Dropout       | 0.2            | 0.9689           | 0.0056                         |
| Dropout       | 0.4            | 0.9405           | 0.0117                         |
| Dropout       | 0.5            | 0.8099           | 0.0619                         |
| Dropout       | 0.8            | -0.0034          | 0.3426                         |
| Input order   | 1              | 0.9659           | 0.0147                         |
| Input order   | 2              | 0.9740           | 0.0051                         |
| Input order   | 3              | 0.9722           | 0.0131                         |
| Input order   | 4              | 0.9652           | 0.0135                         |
| Input order   | 5              | 0.9656           | 0.0068                         |
| Number layers | 2              | 0.9708           | 0.0090                         |
| Number layers | 4              | 0.9512           | 0.0235                         |
| Number layers | 6              | 0.9330           | 0.0079                         |
| Number layers | 8              | 0.9272           | 0.0122                         |
| Number layers | 10             | 0.8917           | 0.0236                         |

Table 12: CIFAR100MLP Pearson's correlation using Silhouette distance.

## 0.1 CORRELATION POINTS

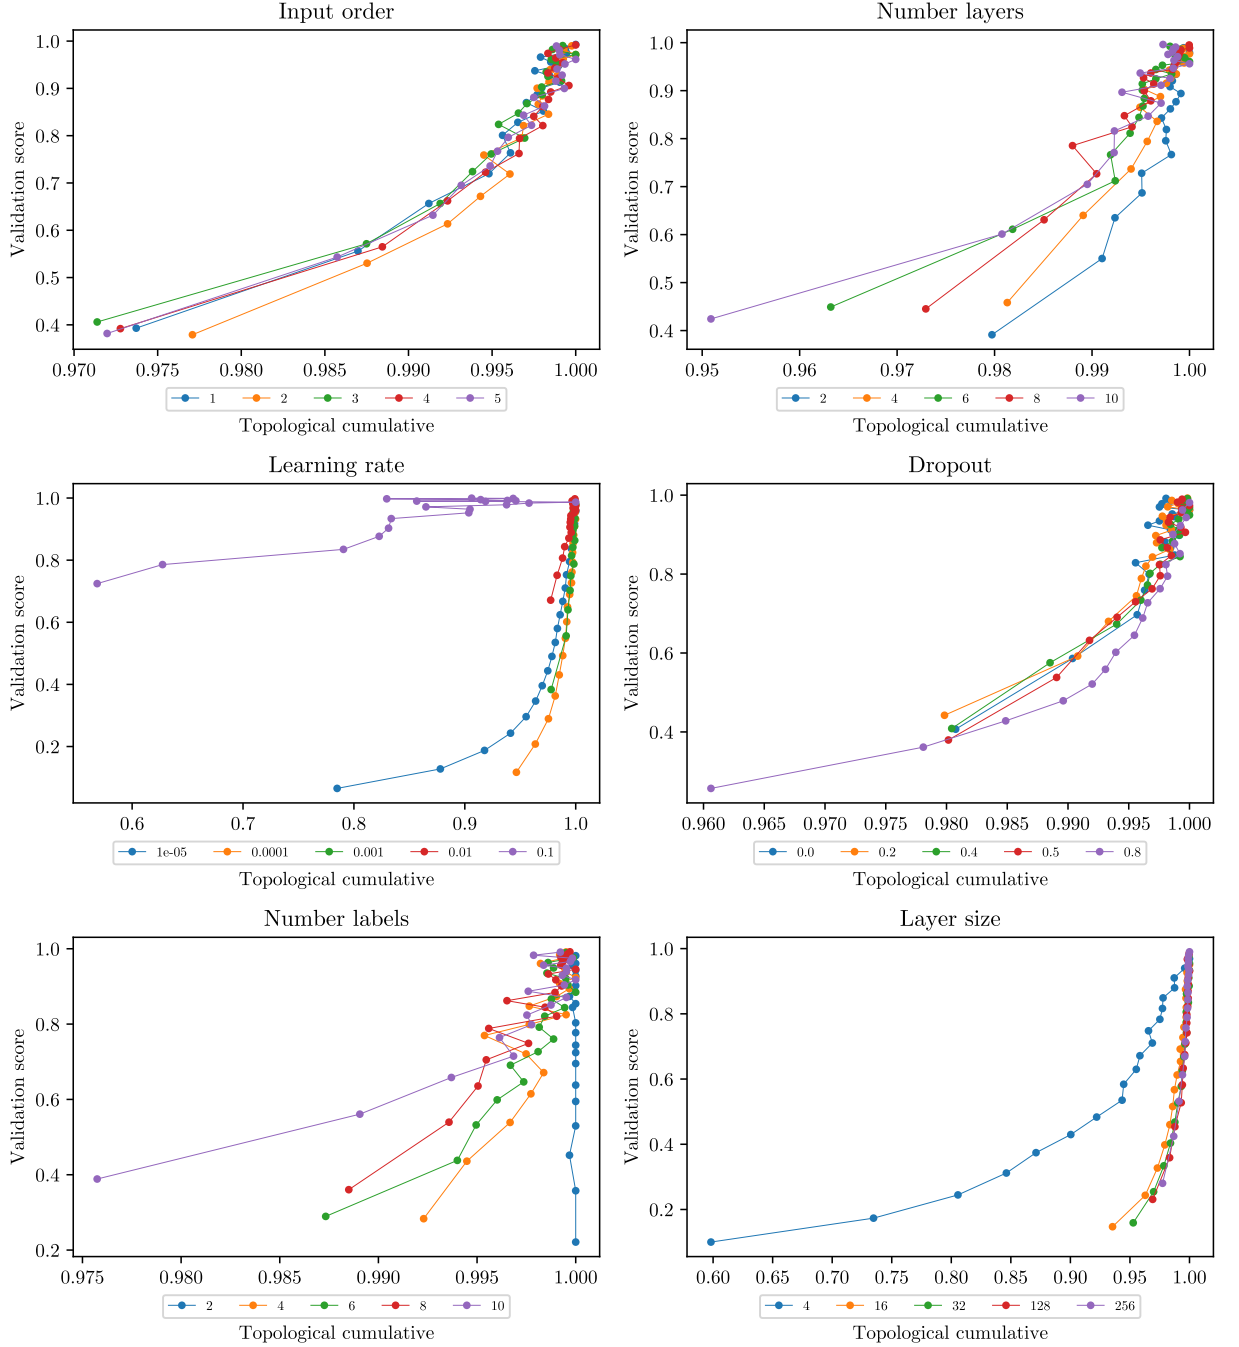

Figure 42: MNIST points relationship across epochs using Heat discretization.

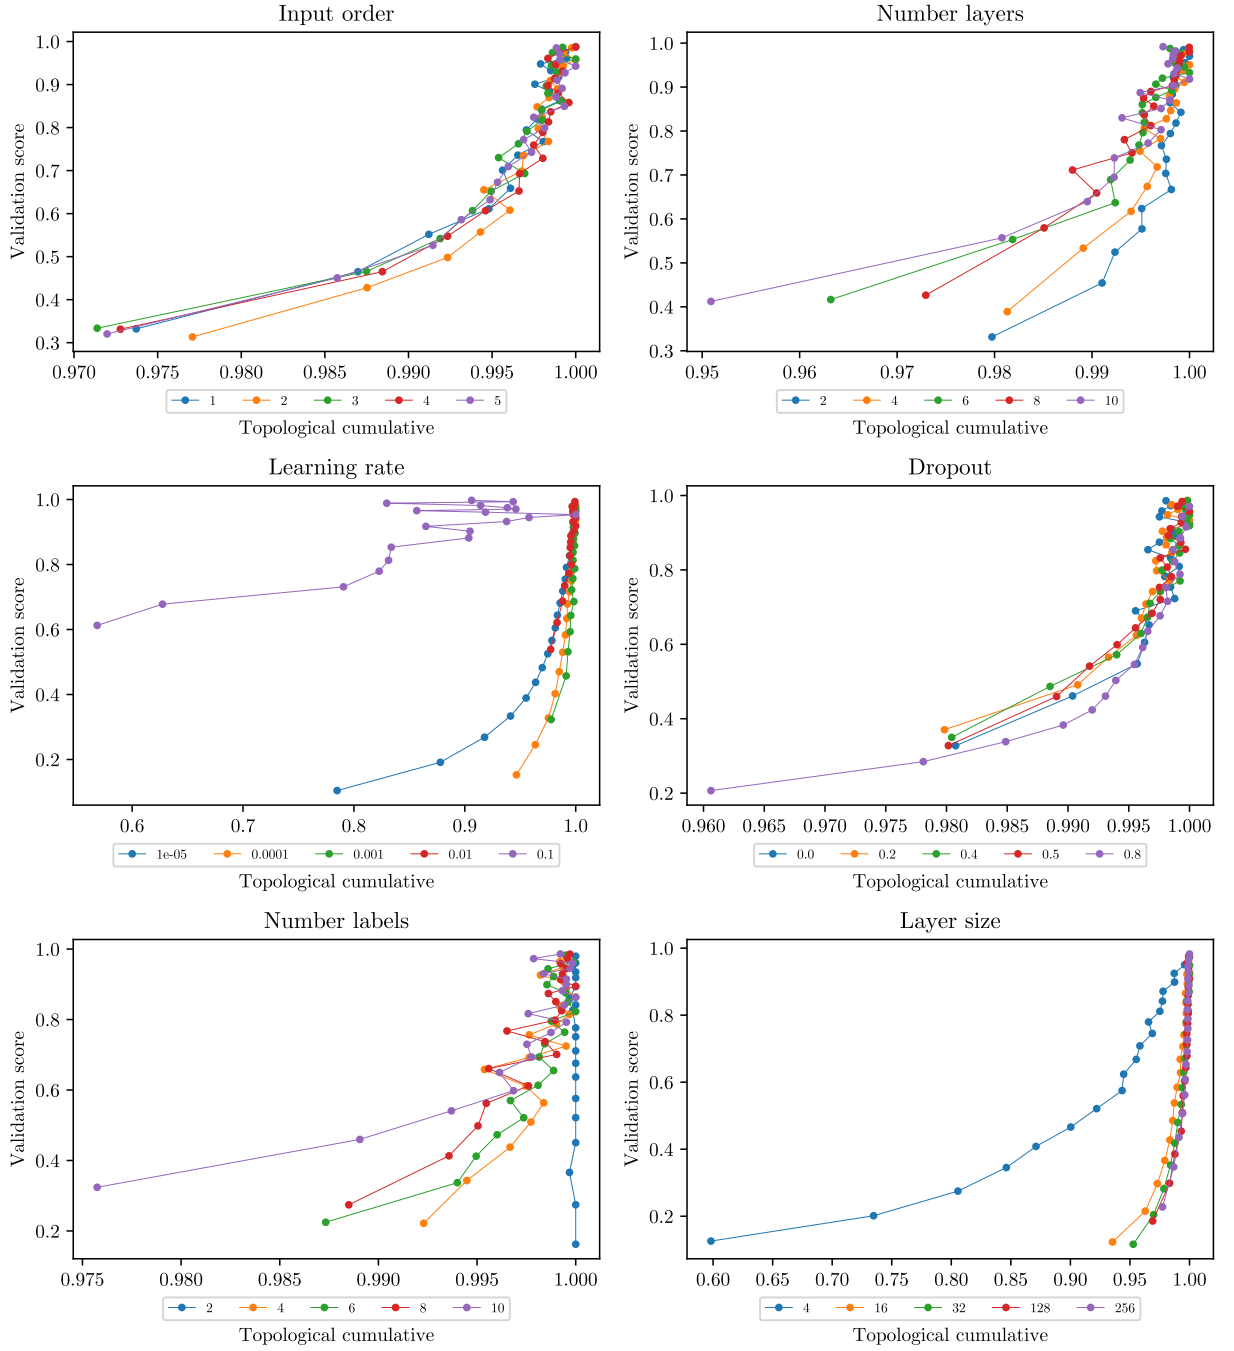

Figure 43: MNIST points relationship across epochs using Silhouette discretization.

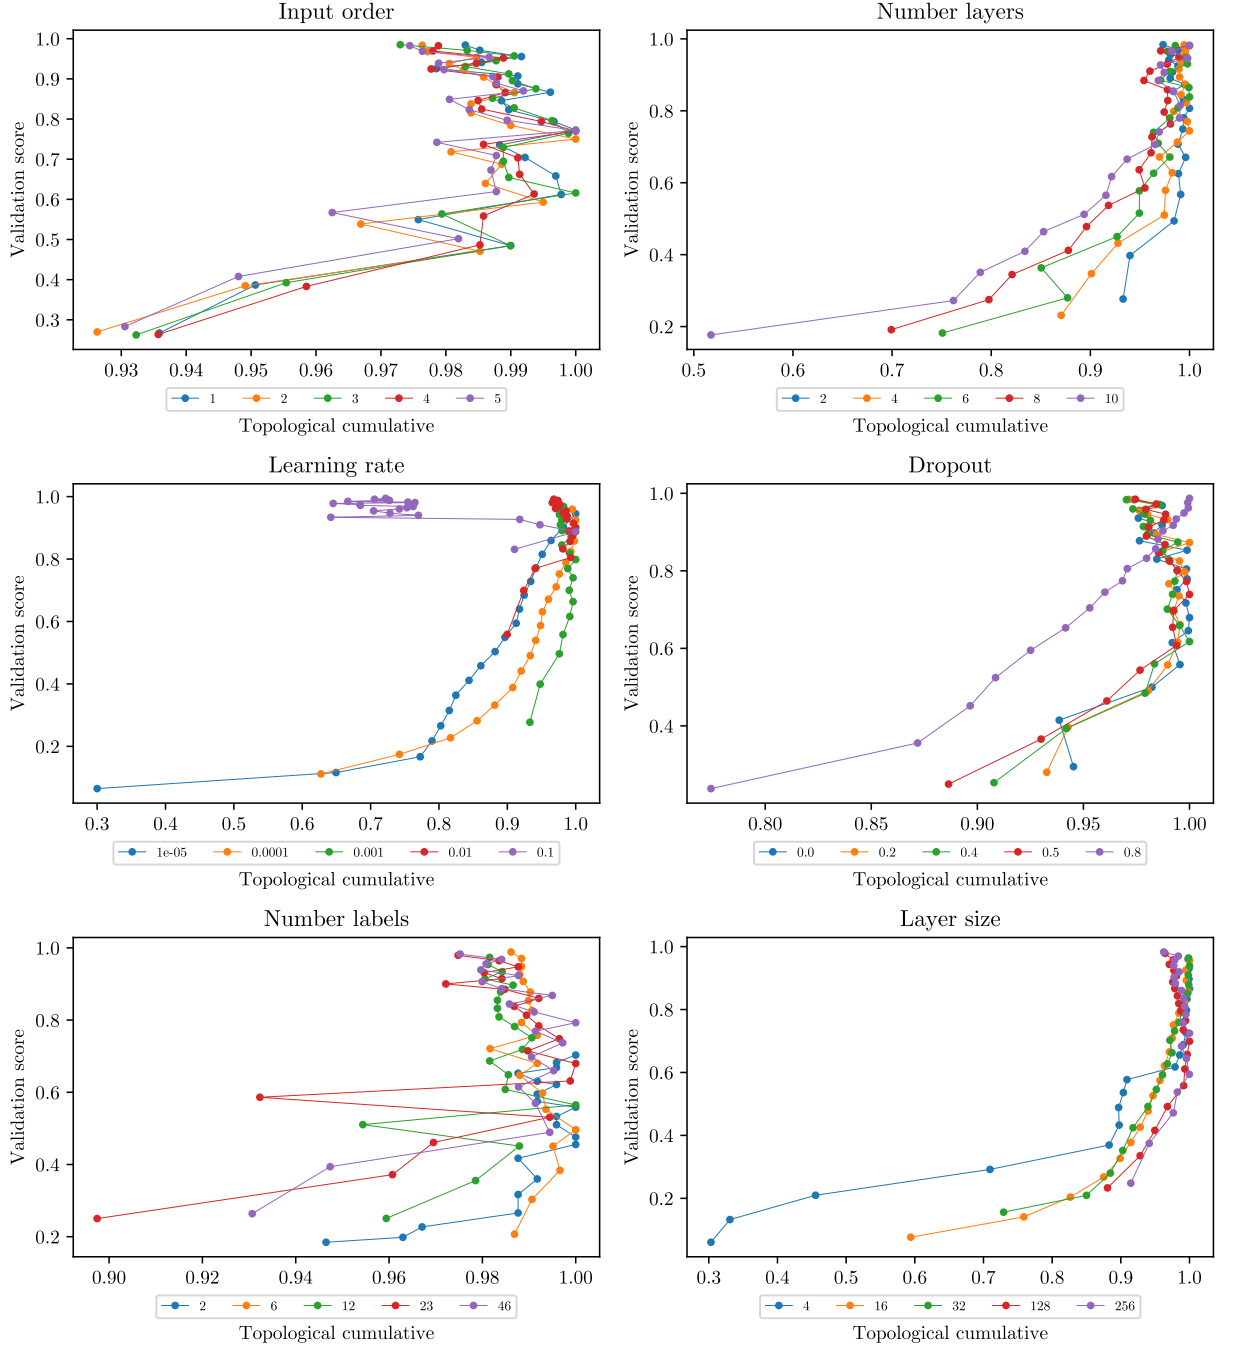

Figure 44: Reuters points relationship across epochs using Heat discretization.

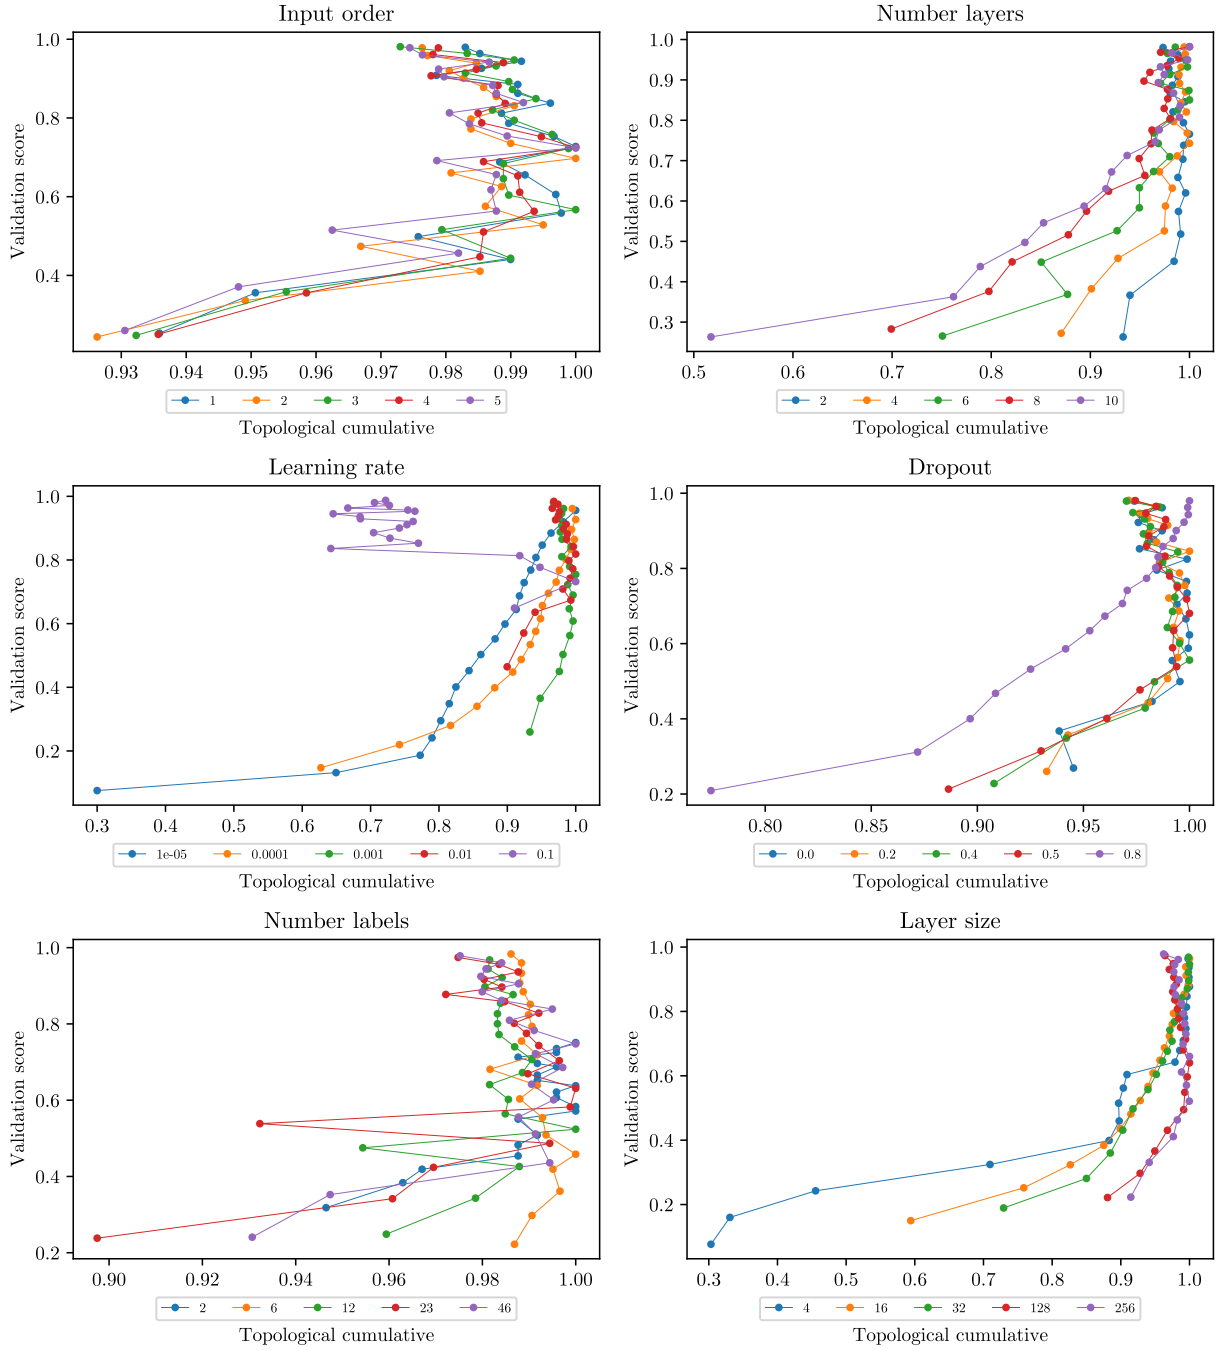

Figure 45: Reuters points relationship across epochs using Silhouette discretization.

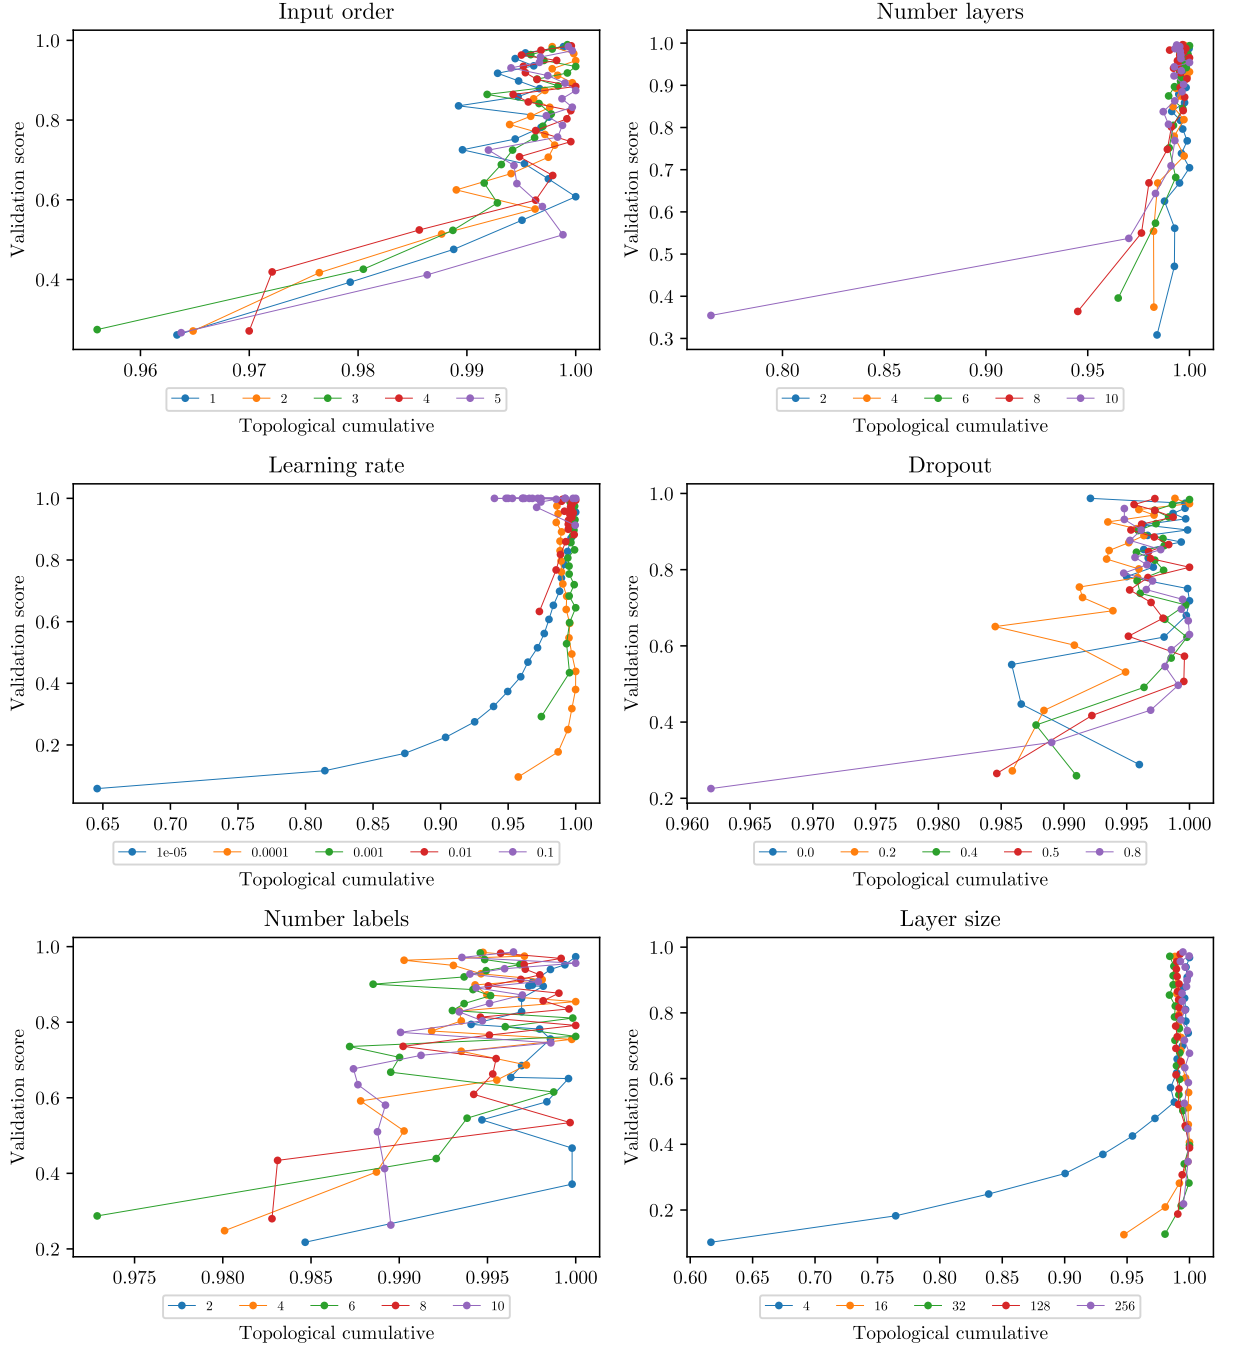

Figure 46: CIFAR-10 CNN points relationship across epochs using Heat discretization.

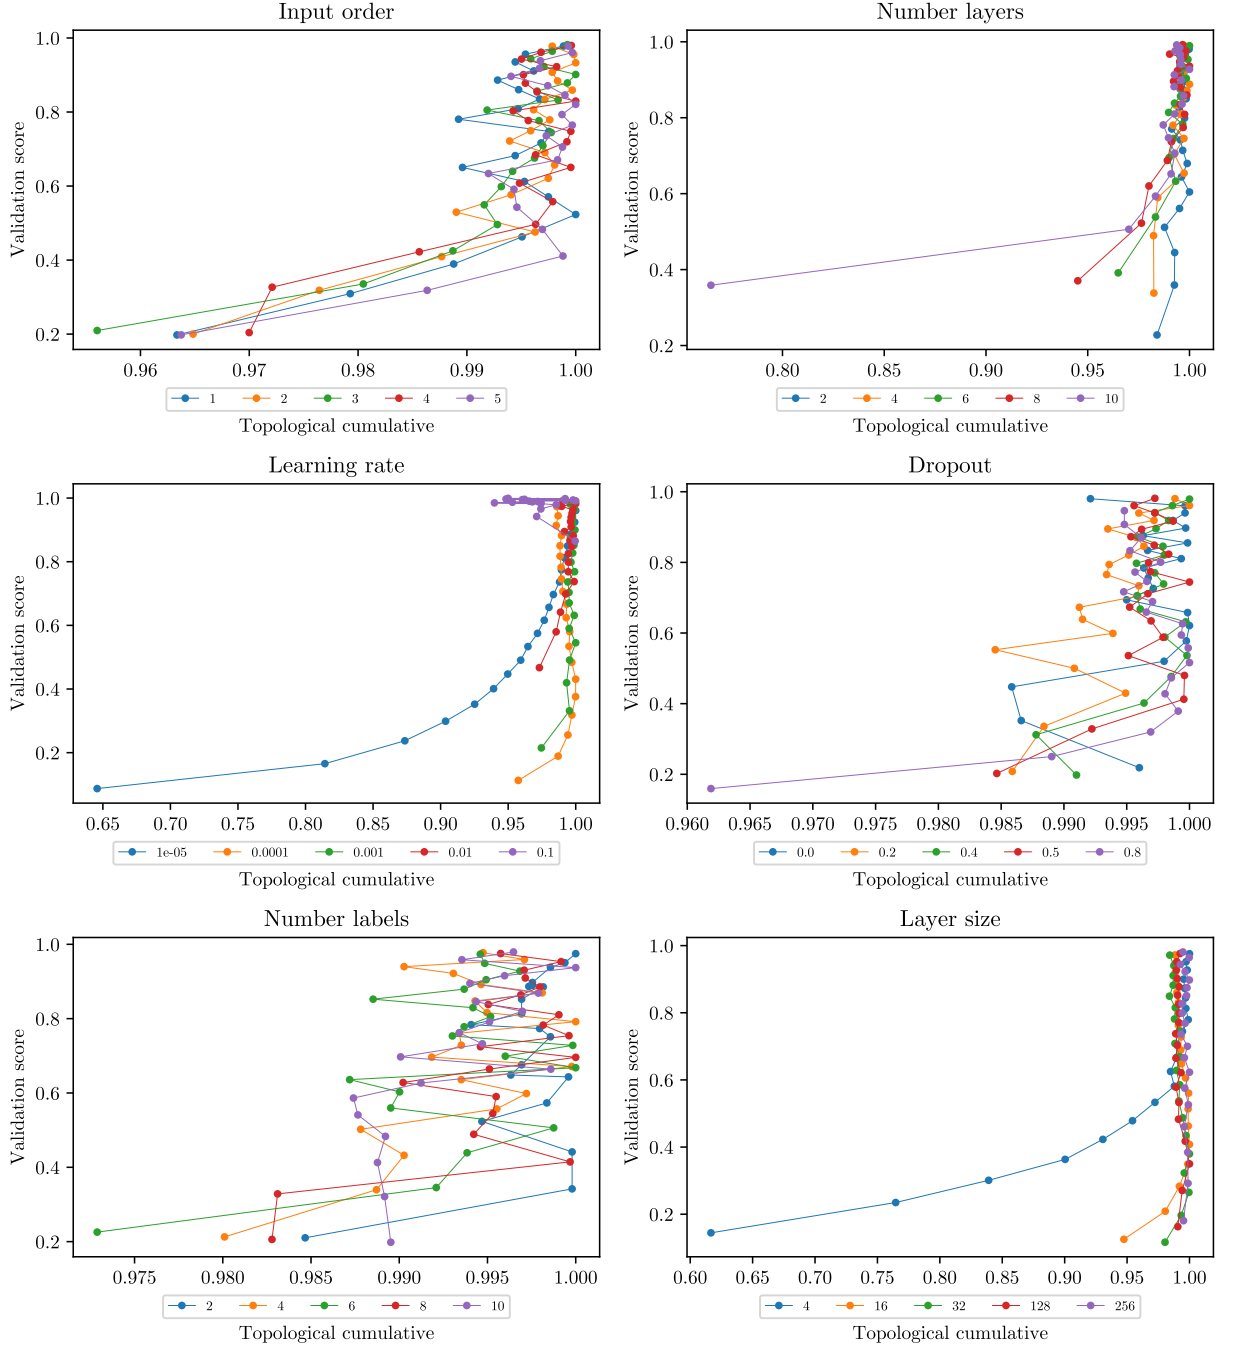

Figure 47: CIFAR-10 CNN points relationship across epochs using Silhouette discretization.

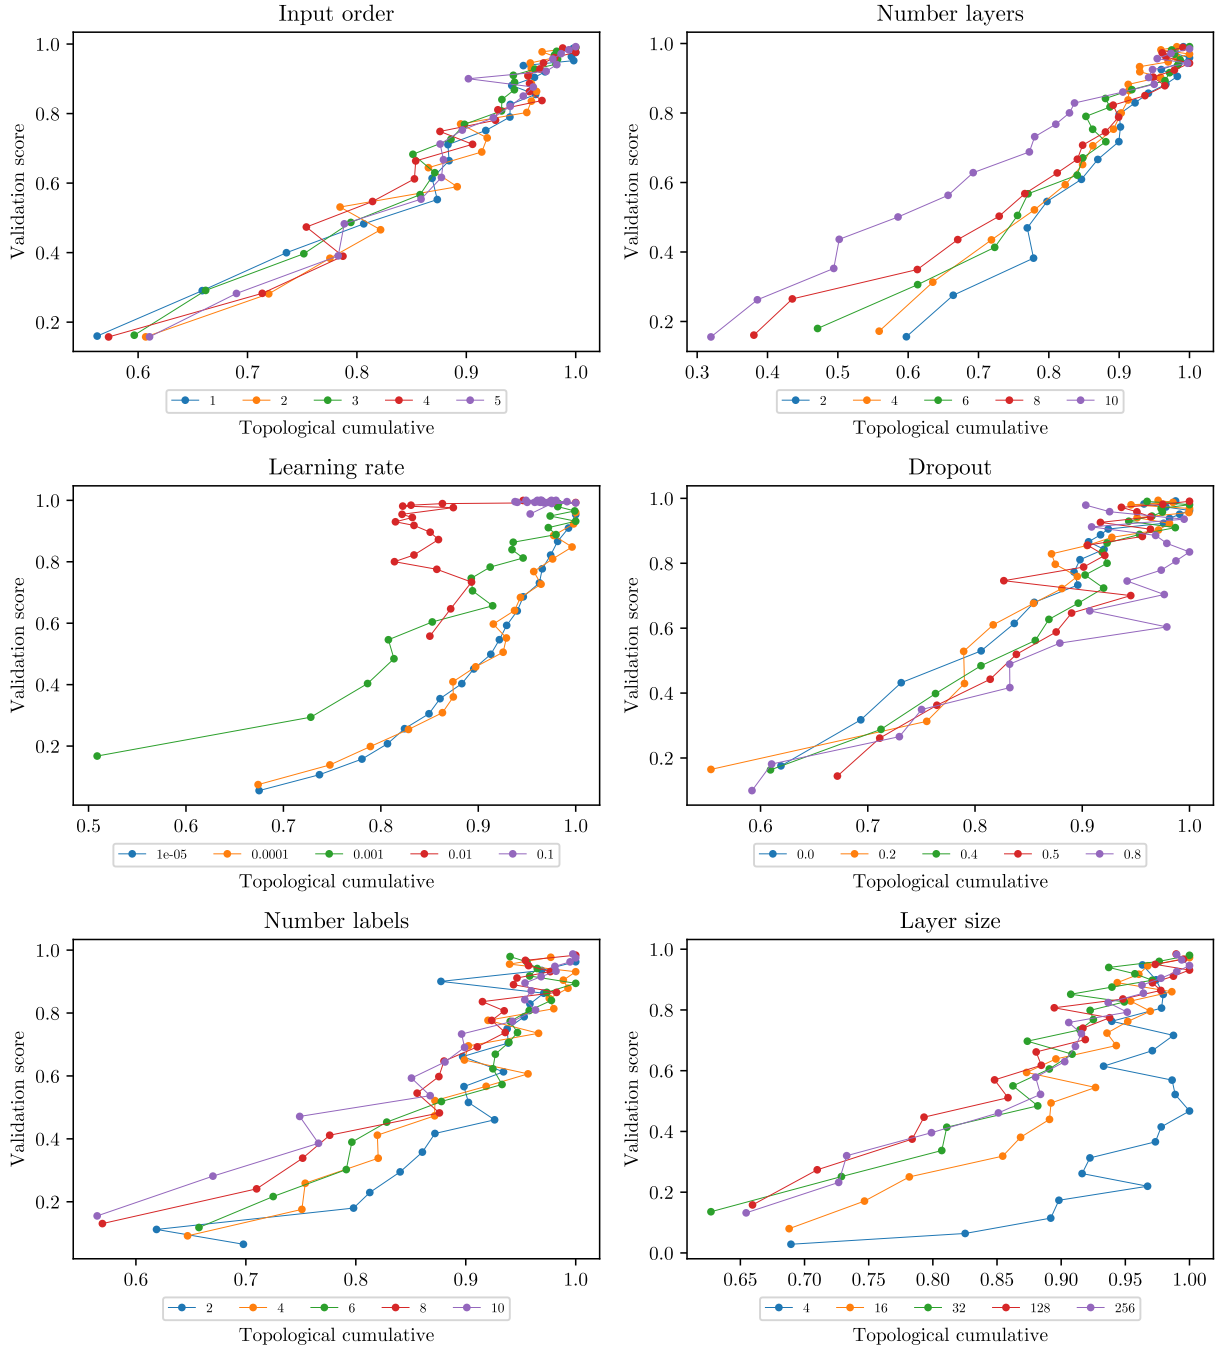

Figure 48: CIFAR-10 MLP points relationship across epochs using Heat discretization.



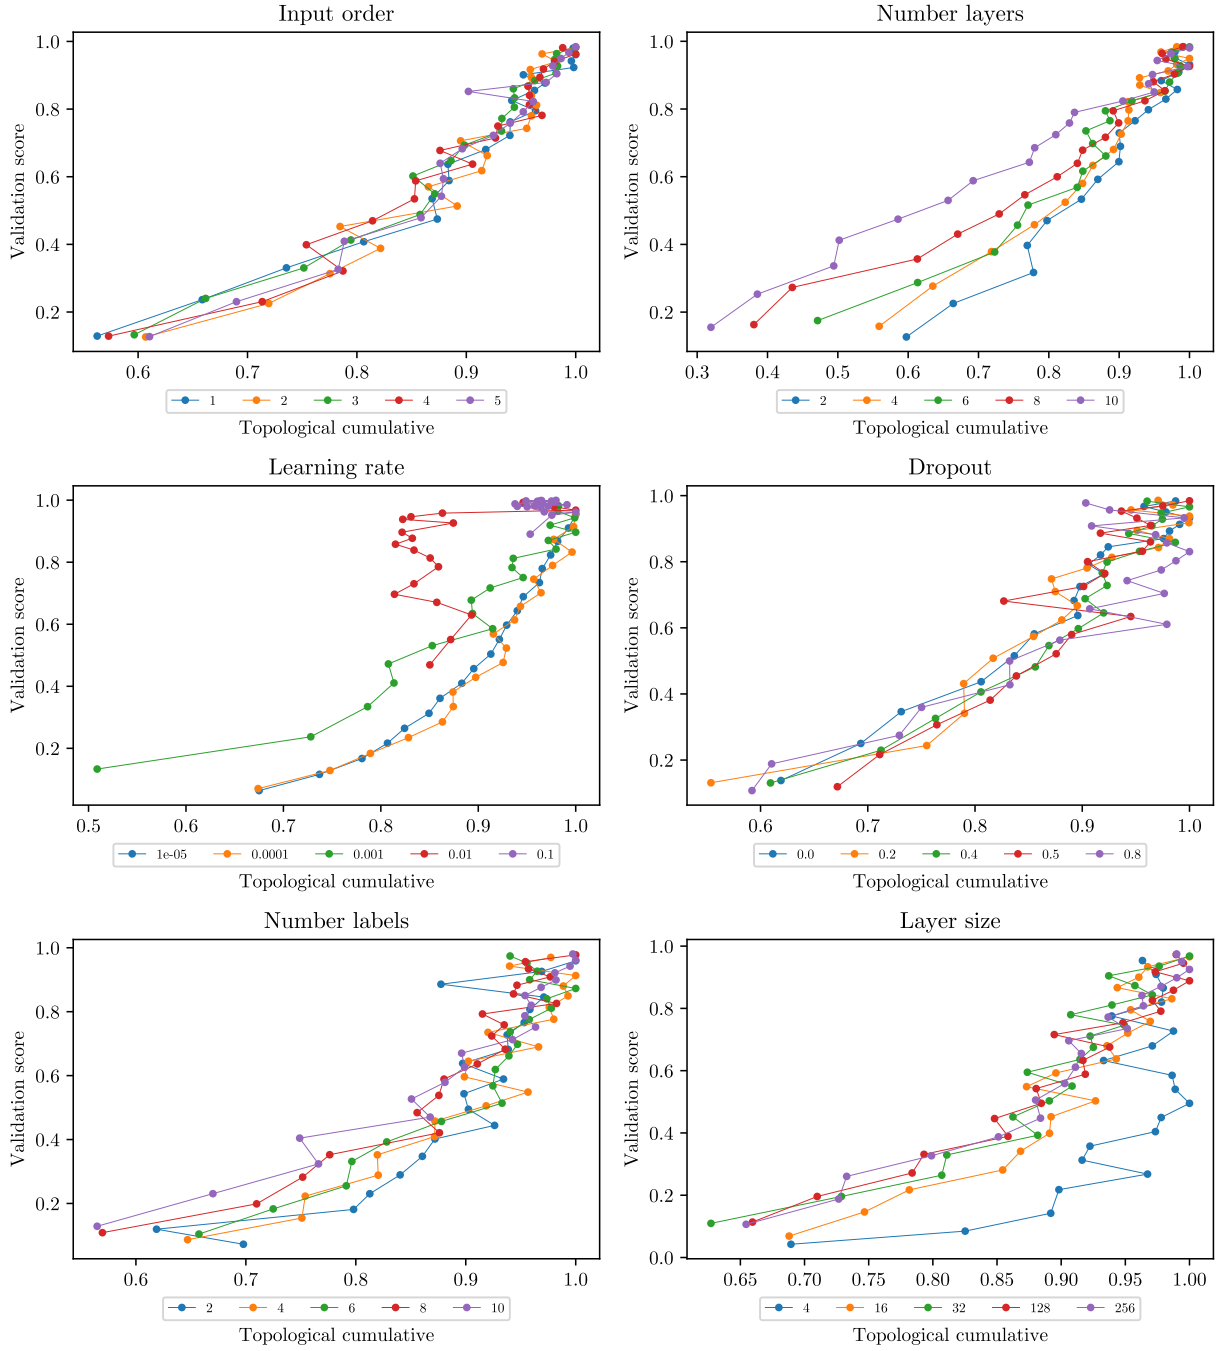

Figure 49: CIFAR-10 MLP points relationship across epochs using Silhouette discretization.

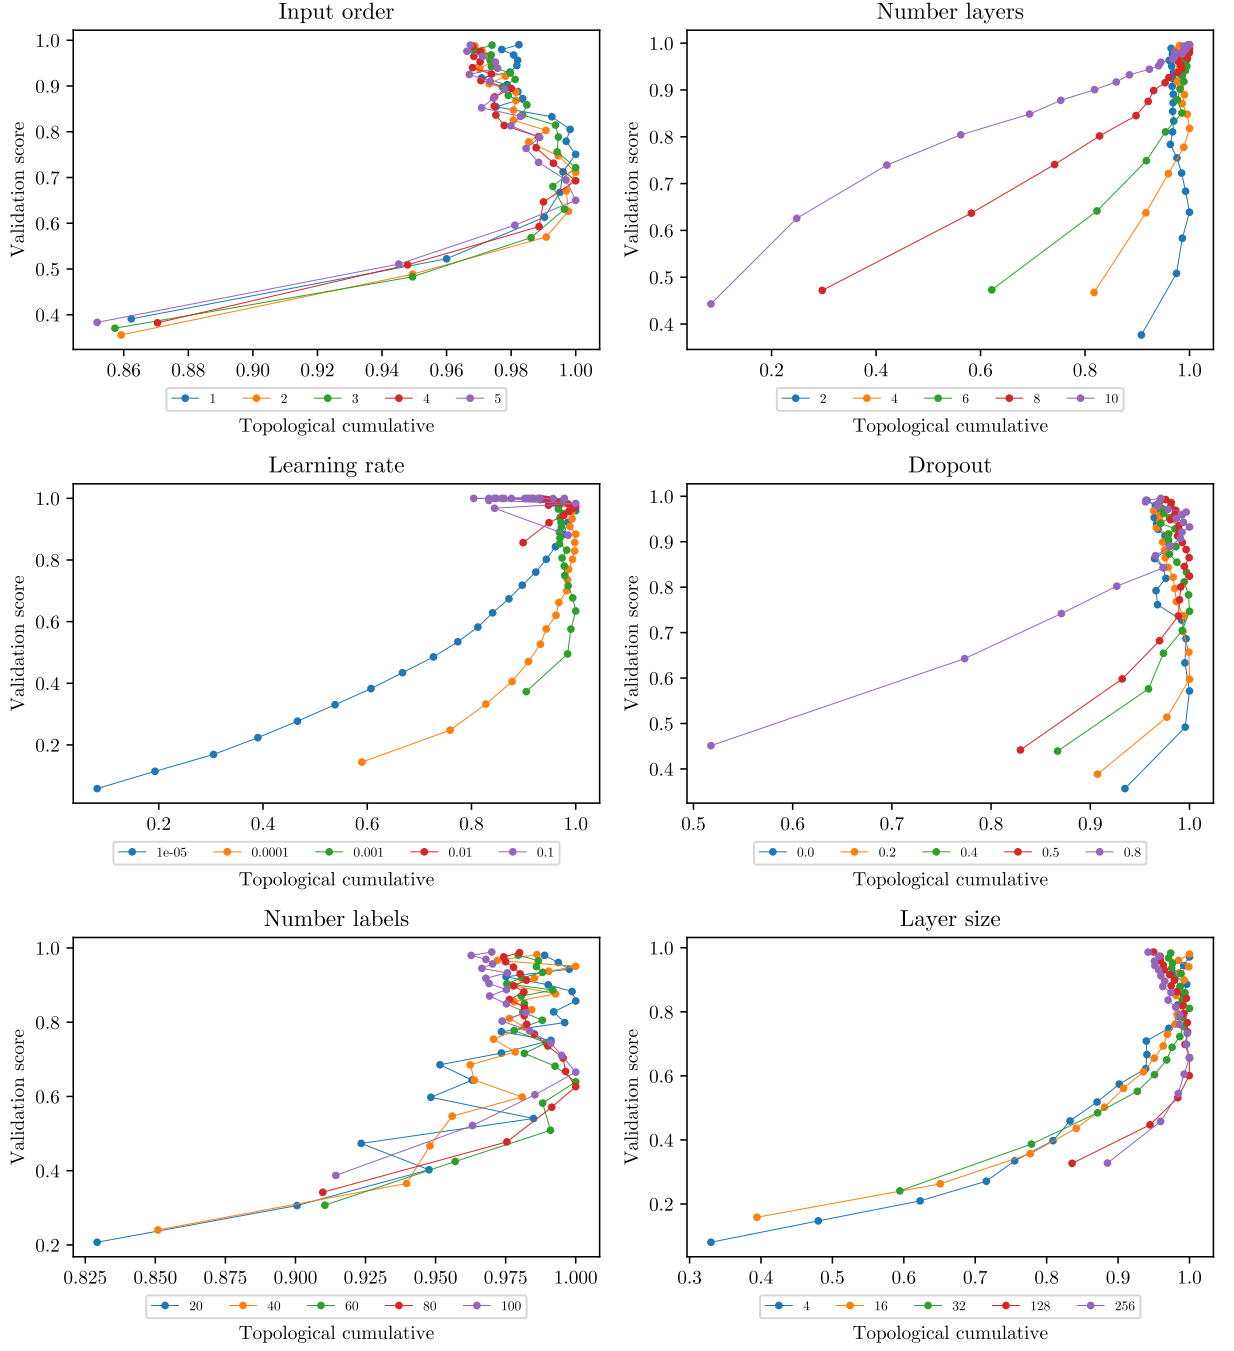

Figure 50: CIFAR-100 CNN points relationship across epochs using Heat discretization.

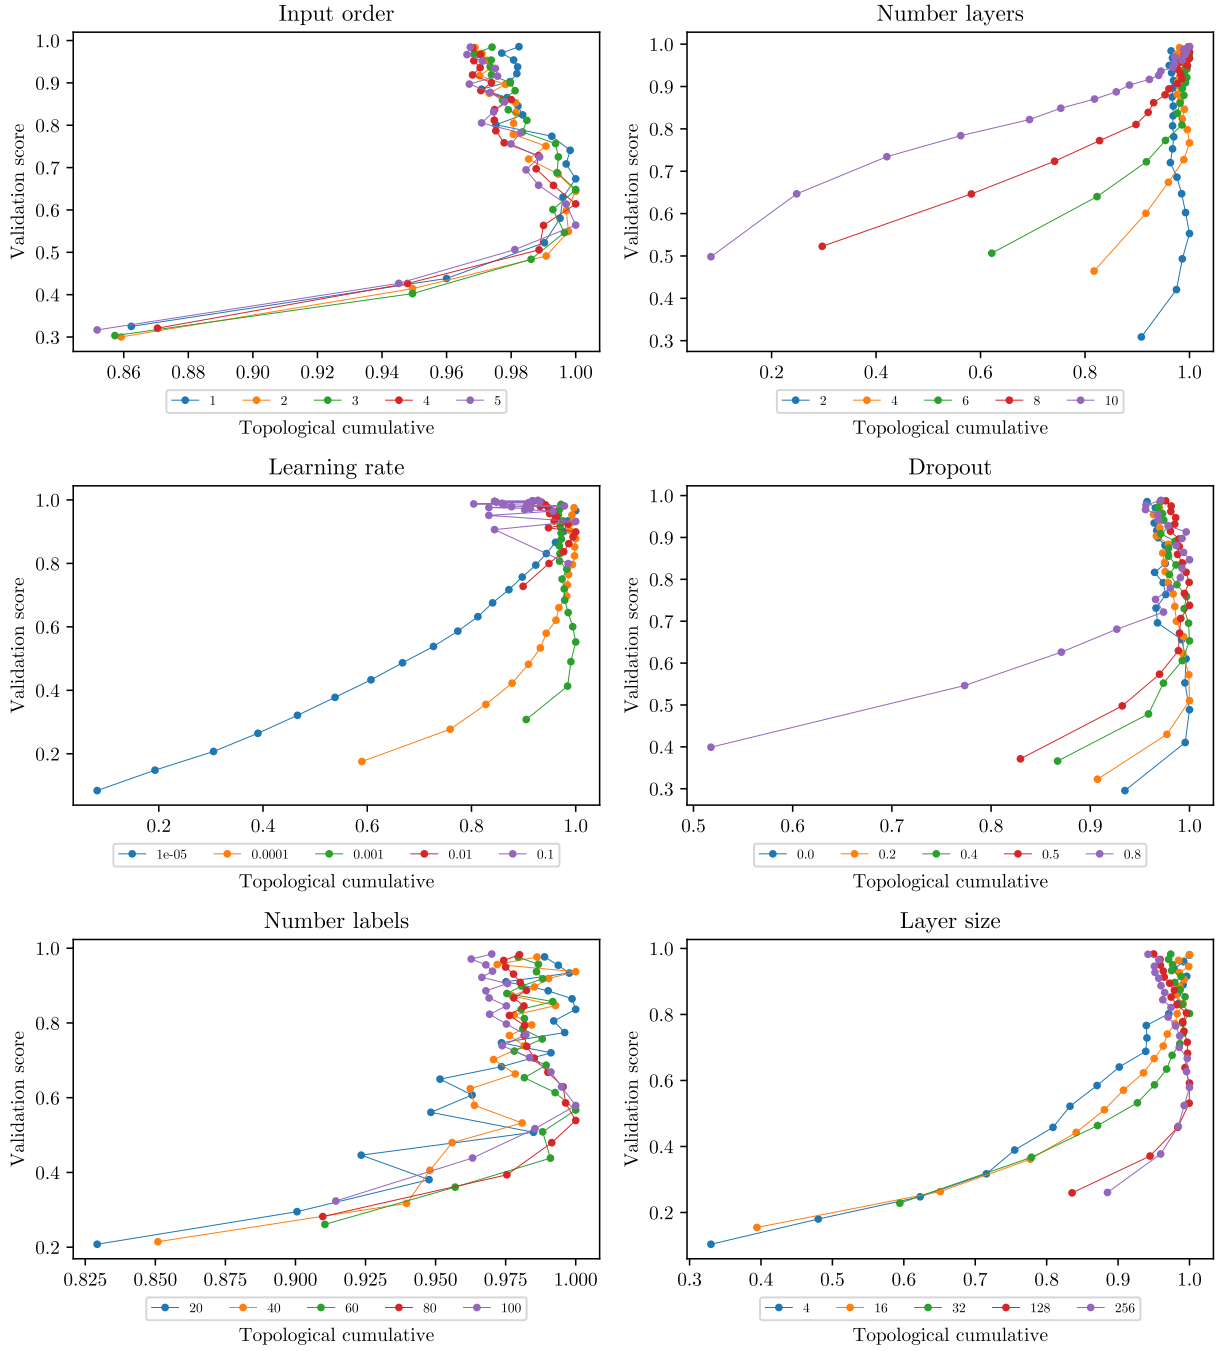

Figure 51: CIFAR-100 CNN points relationship across epochs using Silhouette discretization.

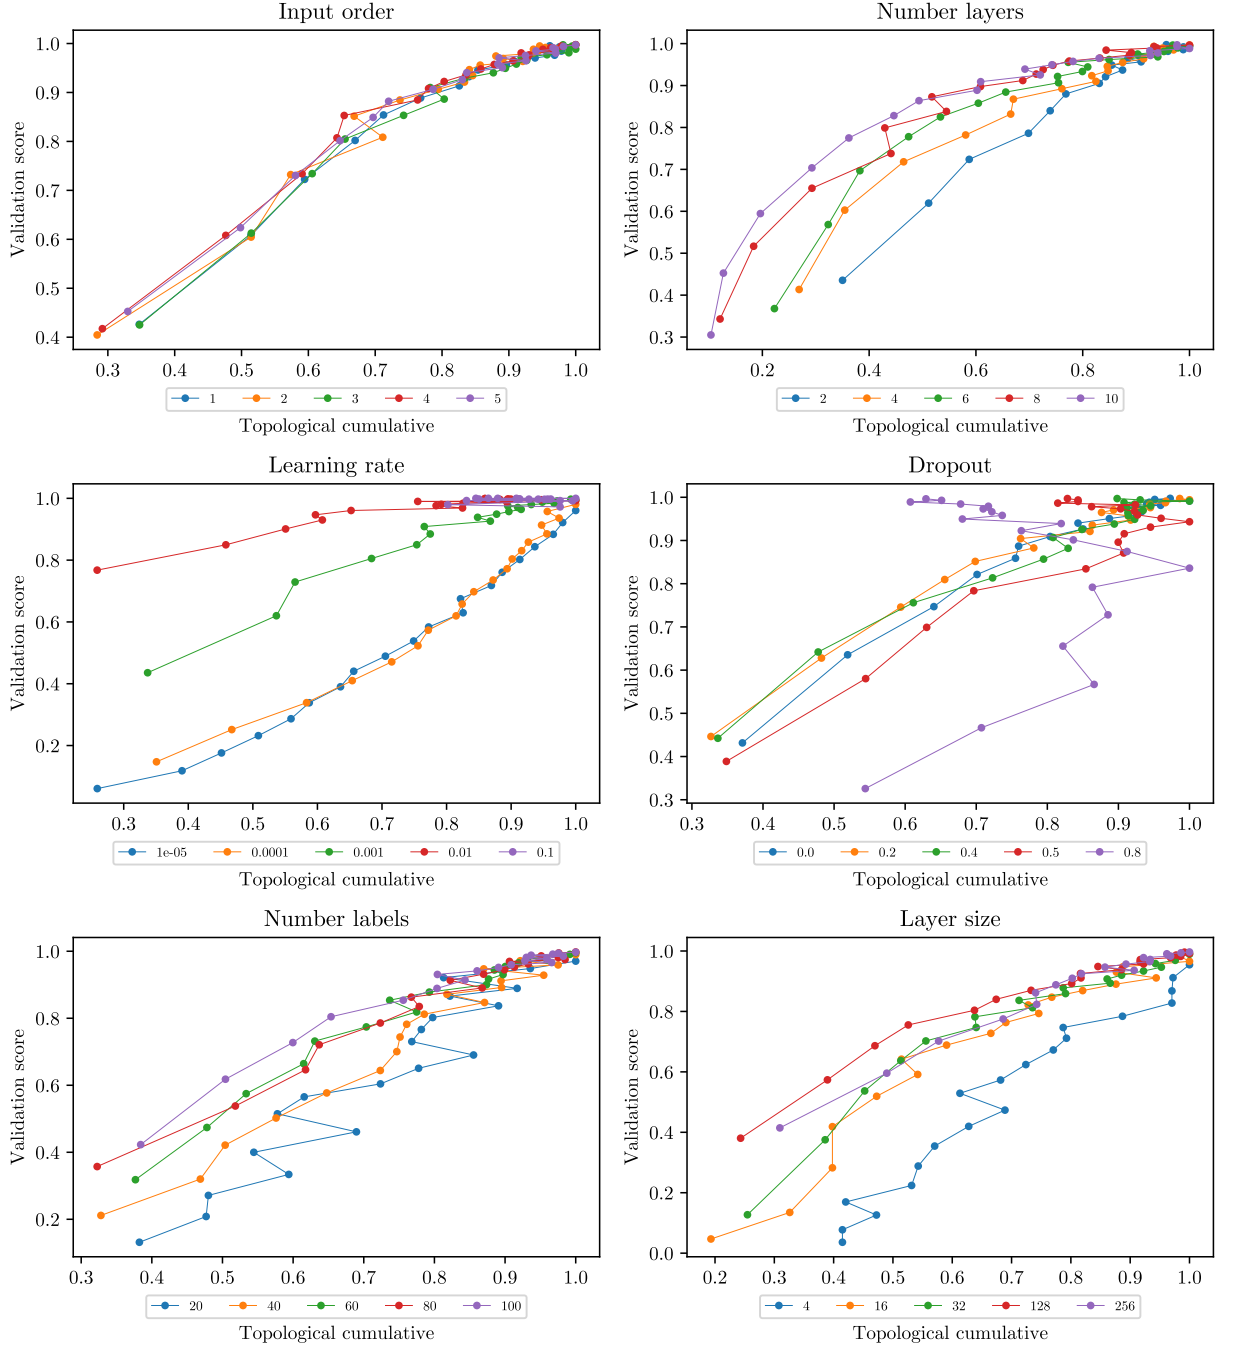

Figure 52: CIFAR-100 MLP points relationship across epochs using Heat discretization.

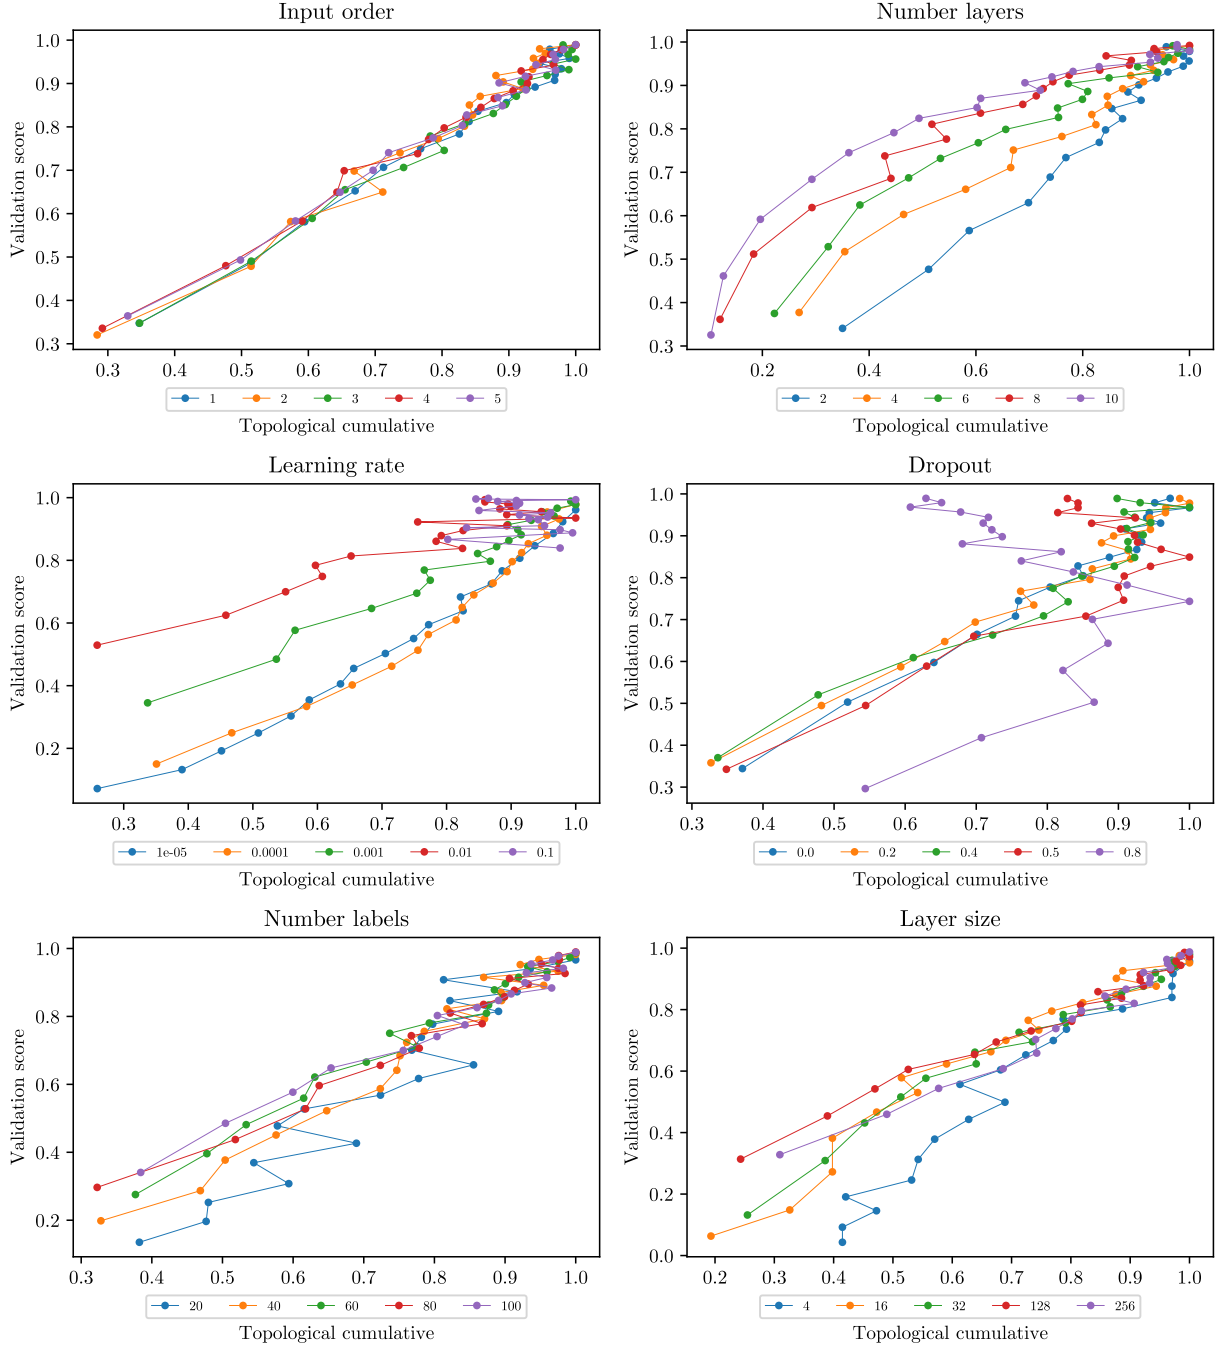

Figure 53: CIFAR-100 MLP points relationship across epochs using Silhouette discretization.

## REFERENCES

- E. Berry, Yen-Chi Chen, J. Cisewski-Kehe, and Brittany Terese Fasy. Functional summaries of persistence diagrams. *Journal of Applied and Computational Topology*, 4:211–262, 2020.
- Guillaume Tausin, Umberto Lupo, Lewis Tunstall, Julian Burella Pérez, Matteo Caorsi, Anibal Medina-Mardones, Alberto Dassatti, and Kathryn Hess. giotto-tda: A topological data analysis toolkit for machine learning and data exploration, 2020.
